# Supplementary material for: Analysis of the Cancer Genome Atlas Data Reveals Novel Putative ncRNAs Targets in Hepatocellular Carcinoma
Source: Biomed Res Int. 2018 Jun 26;2018:2864120. doi: 10.1155/2018/2864120 (PMC6038674; doi:10.1155/2018/2864120)
Supplement: Supplementary Materials — Figure S1: volcano plot representing differentially expressed transcripts (primary solid tumor x normal tissues). (A.) Total RNA. (B.) MicroRNA. Blue dots: upregulated transcripts in tumor samples. Red dots: downregulated transcripts in tumor samples. Black dots: statistically nonsignificant expressed transcripts. logFC: log2 fold change. Vertical gray lines: cut-off of logFC < -1 and logFC > 1. Horizontal purple line: FDR cut-off of 0.01. Table S1: differentially expressed data from total RNA. logFC: log2 fold change. Table S2: differentially expressed miRNAs. logFC: log2 fold change. [file 2864120.f1.xls]

## Sheet: Table_S1
Table S1. Differentially expressed data from total RNA. logFC: log2 fold change.
Ensembl ID	logFC	FDR	Tumor	Normal	Delta	entrezgene	external_gene_name
ENSG00000173226	1.1836	5.37509e-07	4.68931e+08	1.99739e+08	5.55026e+08	9657	IQCB1
ENSG00000082701	1.01374	0.000435588	5.40107e+08	2.63172e+08	5.47529e+08	2932	GSK3B
ENSG00000156689	2.52864	5.93427e-12	6.25502e+07	1.0576e+07	1.58167e+08	219970	GLYATL2
ENSG00000122971	4.42892	1.8847e-10	2.45916e+07	1.11464e+06	1.08914e+08	35	ACADS
ENSG00000102098	-2.51616	2.64545e-05	3.17027e+07	1.78382e+08	7.97692e+07	10389	SCML2
ENSG00000180233	3.99564	4.78321e-09	1.84781e+07	1.11025e+06	7.38319e+07	223082	ZNRF2
ENSG00000175054	2.90466	1.54298e-08	1.45717e+07	1.79781e+06	4.23259e+07	545	ATR
ENSG00000187664	1.82676	0.0026301	2.29358e+07	6.37379e+06	4.1898e+07	404037	HAPLN4
ENSG00000169629	1.00043	6.714e-07	3.93907e+07	1.91772e+07	3.94075e+07	727851	RGPD8
ENSG00000198915	1.67597	8.4213e-09	2.31329e+07	7157950	3.87701e+07	221002	RASGEF1A
ENSG00000102984	6.63967	1.32746e-19	5.40689e+06	50430.8	3.59e+07	55565	ZNF821
ENSG00000136319	1.40632	3.74568e-05	2.2784e+07	8.56298e+06	3.20416e+07	91875	TTC5
ENSG00000123171	-1.61014	0.000145652	1.7886e+07	5.59103e+07	2.8799e+07	83446	CCDC70
ENSG00000224924	1.16792	2.37564e-11	2.23964e+07	9.76145e+06	2.61571e+07	387486	LINC00320
ENSG00000163848	1.3074	2.17065e-13	1.94226e+07	7.63155e+06	2.53931e+07	7707	ZNF148
ENSG00000136155	1.50849	5.38549e-23	1.4545e+07	5.01027e+06	2.1941e+07	8796	SCEL
ENSG00000182134	1.37795	0.00411709	1.48338e+07	5.56913e+06	2.04402e+07	11022	TDRKH
ENSG00000106714	5.40929	6.95939e-18	3.40619e+06	77967.2	1.8425e+07	79937	CNTNAP3
ENSG00000214102	1.2887	0.00199665	1.21065e+07	4.788e+06	1.56017e+07	494551	WEE2
ENSG00000178913	6.35839	2.24883e-22	2.4227e+06	29561.9	1.54045e+07	6879	TAF7
ENSG00000186119	1.00724	4.77034e-12	14733868	7.30395e+06	1.48405e+07	219438	OR5D18
ENSG00000167987	1.50321	3.18558e-16	9.70916e+06	3.31336e+06	1.45949e+07	55048	VPS37C
ENSG00000166508	1.97643	1.32246e-07	7.31177e+06	1.78842e+06	1.44512e+07	4176	MCM7
ENSG00000119408	-1.05525	0.000507919	1.36632e+07	2.8684e+07	1.44181e+07	10783	NEK6
ENSG00000196890	2.25267	3.32701e-07	5.37954e+06	1.04806e+06	1.21184e+07	128312	HIST3H2BB
ENSG00000026950	1.04375	5.25058e-08	1.14989e+07	5.43445e+06	1.2002e+07	11119	BTN3A1
ENSG00000260456	1.54398	2.38505e-14	7.69764e+06	2.64476e+06	1.1885e+07	100506581	C16orf95
ENSG00000174444	1.03873	1.78897e-10	1.13818e+07	5.4351e+06	1.18226e+07	6124	RPL4
ENSG00000167302	2.63561	6.77863e-09	4.40784e+06	676335	1.16173e+07	146705	TEPSIN
ENSG00000189376	1.05453	7.65663e-11	1.07994e+07	5.10627e+06	1.13883e+07	84933	C8orf76
ENSG00000141026	4.61506	4.1312e-12	2.3086e+06	94085.2	1.06543e+07	55090	MED9
ENSG00000263746	2.24786	3.04549e-21	4.69157e+06	969873	1.0546e+07	100422966	MIR4277
ENSG00000169245	1.06413	7.82941e-09	9.58572e+06	4.44766e+06	1.02005e+07	3627	CXCL10
ENSG00000186283	-1.89048	2.26839e-06	5.324e+06	1.89324e+07	1.00649e+07	64222	TOR3A
ENSG00000087053	-1.1181	7.66811e-09	8.16984e+06	1.77239e+07	9.13469e+06	8898	MTMR2
ENSG00000119698	1.50201	7.27621e-10	6.01772e+06	2.07386e+06	9.03869e+06	57718	PPP4R4
ENSG00000182896	-1.61717	1.70865e-08	5.49497e+06	1.71505e+07	8.8863e+06	339168	TMEM95
ENSG00000120948	1.85548	2.55539e-10	4.75618e+06	1.28206e+06	8.82502e+06	23435	TARDBP
ENSG00000206107	1.55211	8.04237e-05	5.61854e+06	1951244	8.72061e+06	643812	KRTAP27-1
ENSG00000176476	1.80454	2.33787e-09	4.81873e+06	1348412	8.69558e+06	112869	SGF29
ENSG00000095739	8.69157	1.3283e-19	974377	2238.8	8.46887e+06	25805	BAMBI
ENSG00000251562	7.7771	7.26758e-13	1.05046e+06	4618.29	8.16956e+06	378938	MALAT1
ENSG00000081026	1.22663	1.21474e-09	6.6248e+06	2.78458e+06	8.12619e+06	260425	MAGI3
ENSG00000204859	-1.44264	6.52956e-07	4.96671e+06	1.36309e+07	7.16518e+06	3104	ZBTB48
ENSG00000189134	2.73402	4.83902e-07	2.53997e+06	387172	6.94431e+06	222698	NKAPL
ENSG00000198732	1.71974	7.32731e-08	3.91919e+06	1.22836e+06	6.73997e+06	64093	SMOC1
ENSG00000117153	1.53269	2.59329e-06	4.3246e+06	1.45601e+06	6.62826e+06	59349	KLHL12
ENSG00000122359	1.71519	5.91698e-06	3.82659e+06	1.11895e+06	6.56335e+06	311	ANXA11
ENSG00000176732	1.6563	2.20587e-25	3.92297e+06	1.21706e+06	6.49761e+06	375189	PFN4
ENSG00000198740	-2.80995	7.42717e-10	2.26568e+06	1.61765e+07	6.36646e+06	22834	ZNF652
ENSG00000167535	10.7175	4.44949e-13	582182	351.732	6.23953e+06	784	CACNB3
ENSG00000116489	-1.45183	1.34302e-05	4.18446e+06	1.16146e+07	6.07512e+06	829	CAPZA1
ENSG00000171016	-1.19905	0.000324742	5.03438e+06	1.1878e+07	6.03649e+06	26108	PYGO1
ENSG00000086696	1.10365	4.42846e-16	5.42452e+06	2.48887e+06	5.98674e+06	3294	HSD17B2
ENSG00000201925	-1.06032	1.27688e-05	5.22499e+06	1.13576e+07	5.54016e+06	100169766	RNA5S15
ENSG00000163827	1.55804	4.29092e-10	3.5343e+06	1.16409e+06	5.50656e+06	79442	LRRC2
ENSG00000117411	-2.4967	2.22312e-08	2.19666e+06	1.26457e+07	5.4844e+06	8704	B4GALT2
ENSG00000116885	-1.5154	7.27297e-08	3.30035e+06	9.51215e+06	5.00134e+06	127700	OSCP1
ENSG00000157554	-1.04836	0.000175653	4.72839e+06	9.88517e+06	4.95704e+06	2078	ERG
ENSG00000107175	1.15596	5.72995e-14	4.19524e+06	1.84572e+06	4.84954e+06	10488	CREB3
ENSG00000121964	1.34298	9.08406e-09	3.56969e+06	1.37747e+06	4.79403e+06	79712	GTDC1
ENSG00000071462	-1.23343	3.95674e-07	3.88053e+06	9.21365e+06	4.78637e+06	114049	BUD23
ENSG00000207773	-2.05052	4.37575e-06	2.31119e+06	1.02571e+07	4.73916e+06	693227	MIR642A
ENSG00000201348	7.83299	4.77777e-16	603059	2585.68	4.72375e+06	26767	RNU105B
ENSG00000086548	1.4061	6.42156e-19	3293811	1.22012e+06	4.63141e+06	4680	CEACAM6
ENSG00000112619	1.04622	1.13221e-10	4.34765e+06	2053766	4.54861e+06	5961	PRPH2
ENSG00000081154	1.06485	5.67692e-08	4.23393e+06	1.99696e+06	4.50848e+06	57092	PCNP
ENSG00000143156	-1.10658	0.00230004	3.99508e+06	8.79495e+06	4.42087e+06	29922	NME7
ENSG00000249709	2.71042	1.0597e-06	1.56926e+06	234715	4.25337e+06	163050	ZNF564
ENSG00000099985	1.10487	8.69018e-11	3.77133e+06	1.74128e+06	4.16681e+06	5008	OSM
ENSG00000164695	3.04009	3.49093e-08	1.34716e+06	170825	4.09548e+06	92421	CHMP4C
ENSG00000198034	1.05019	3.48374e-06	3.79365e+06	1.80605e+06	3.98407e+06	6191	RPS4X
ENSG00000203441	10.1015	5.81478e-16	375445	366.707	3.79255e+06	106478991	LINC00449
ENSG00000121680	1.52243	1.67769e-21	2.35807e+06	808435	3.59e+06	9409	PEX16
ENSG00000163584	1.51277	1.20551e-10	2.2558e+06	792058	3.4125e+06	200916	RPL22L1
ENSG00000147145	2.02472	7.14888e-14	1.68498e+06	405243	3.41162e+06	2846	LPAR4
ENSG00000143401	1.09034	3.48248e-09	3.11405e+06	1.42235e+06	3.39536e+06	81611	ANP32E
ENSG00000168394	-1.24432	0.00421292	2.68563e+06	6.64523e+06	3.3418e+06	6890	TAP1
ENSG00000147274	1.06475	8.72743e-09	3.06915e+06	1.41888e+06	3.26788e+06	27316	RBMX
ENSG00000205642	8.38984	6.82852e-18	381519	1088.27	3.20089e+06	425054	VCX3B
ENSG00000105825	1.15272	2.56826e-06	2.72048e+06	1.1892e+06	3.13594e+06	7980	TFPI2
ENSG00000111052	-1.06113	0.000154894	2.92027e+06	6.09876e+06	3.0988e+06	8825	LIN7A
ENSG00000264139	1.00128	2.61086e-13	3.00743e+06	1.47821e+06	3.01129e+06	100500882	MIR3667
ENSG00000182324	1.00921	4.431e-08	2.92156e+06	1.42573e+06	2.94846e+06	3770	KCNJ14
ENSG00000163737	-1.92299	1.93779e-07	1.51535e+06	5.52732e+06	2.91399e+06	5196	PF4
ENSG00000136872	-1.57999	1.90267e-08	1.82099e+06	5.38667e+06	2.87714e+06	229	ALDOB
ENSG00000208037	-3.00615	1.20408e-15	953194	7.76432e+06	2.86544e+06	407037	MIR320A
ENSG00000091592	-1.5225	4.41405e-09	1.86539e+06	5.37927e+06	2.84006e+06	22861	NLRP1
ENSG00000207392	5.50739	8.23329e-19	495614	10932.1	2.72954e+06	677806	SNORA20
ENSG00000166925	1.20814	1.84218e-19	2.25261e+06	962799	2.72147e+06	81628	TSC22D4
ENSG00000108306	4.92177	5.00718e-14	544088	15758.4	2.67788e+06	84961	FBXL20
ENSG00000269113	-2.08081	1.87256e-08	1.28194e+06	5.67251e+06	2.66747e+06	388630	TRABD2B
ENSG00000136143	1.01057	4.89343e-08	2.59946e+06	1.28812e+06	2.62693e+06	8803	SUCLA2
ENSG00000117971	2.09298	5.57965e-20	1.24614e+06	290463	2.60815e+06	1143	CHRNB4
ENSG00000219073	-1.7753	2.3399e-11	1.42841e+06	4.75781e+06	2.53585e+06	23436	CELA3B
ENSG00000124370	1.90662	2.23889e-12	1.32187e+06	342613	2.5203e+06	84693	MCEE
ENSG00000108423	2.82266	3.81581e-06	856323	124065	2.41711e+06	51174	TUBD1
ENSG00000147601	2.09876	7.04272e-11	1.13684e+06	263092	2.38596e+06	7013	TERF1
ENSG00000204842	-1.30468	6.77373e-08	1.8058e+06	4395168	2.356e+06	6311	ATXN2
ENSG00000200959	-2.37263	1.26044e-10	926157	4.73417e+06	2.19743e+06	26821	SNORA74A
ENSG00000165370	1.75463	9.51958e-11	1.22967e+06	352649	2.15761e+06	83550	GPR101
ENSG00000213341	3.34222	5.66668e-10	640900	62006.8	2.14203e+06	1147	CHUK
ENSG00000163870	-1.30798	0.00013576	1.63345e+06	4.02164e+06	2.13653e+06	131601	TPRA1
ENSG00000165568	1.34507	1.77822e-16	1.53224e+06	594543	2.06097e+06	83592	AKR1E2
ENSG00000197016	5.33225	1.35019e-11	383048	8237.88	2.04251e+06	388566	ZNF470
ENSG00000132740	-2.71607	5.96628e-05	750675	5.60199e+06	2.03889e+06	3508	IGHMBP2
ENSG00000147650	-1.13079	5.19895e-08	1.80246e+06	3.95595e+06	2.03821e+06	29967	LRP12
ENSG00000161912	-1.19425	1.19691e-09	1.70534e+06	3.99652e+06	2.0366e+06	221442	ADCY10P1
ENSG00000143184	1.6756	7.12207e-08	1.2026e+06	363946	2.01507e+06	6375	XCL1
ENSG00000176754	1.37572	4.73279e-16	1.46267e+06	554859	2.01223e+06	NA	LINC00303
ENSG00000101972	-1.01355	8.17784e-05	1.98129e+06	3844791	2.00814e+06	10735	STAG2
ENSG00000185090	2.46262	1.50808e-10	813256	145392	2.00274e+06	149175	MANEAL
ENSG00000125450	9.78697	1.33435e-22	199806	230.707	1.9555e+06	79902	NUP85
ENSG00000263872	-1.09155	2.0661e-06	1.78522e+06	3.84571e+06	1.94865e+06	100616232	MIR4528
ENSG00000084693	-1.05917	1.95421e-05	1.81664e+06	3.64611e+06	1.92413e+06	60509	AGBL5
ENSG00000205138	7.4711	4.22038e-14	257286	1462.71	1.92221e+06	644096	SDHAF1
ENSG00000221978	1.9681	9.63994e-07	964840	250339	1.8989e+06	81669	CCNL2
ENSG00000158473	9.60618	5.74119e-21	191477	254.61	1.83936e+06	912	CD1D
ENSG00000074211	-1.31725	1.37435e-08	1.39349e+06	3.40694e+06	1.83558e+06	5522	PPP2R2C
ENSG00000109118	1.26909	4.28629e-16	1.4449e+06	590176	1.8337e+06	57649	PHF12
ENSG00000215252	10.3259	6.96242e-19	176284	144.512	1.82029e+06	440270	GOLGA8B
ENSG00000172156	-1.1514	0.000158222	1.56566e+06	3.55791e+06	1.8027e+06	6356	CCL11
ENSG00000181939	1.0476	2.29389e-12	1.67655e+06	796360	1.75634e+06	81309	OR4C15
ENSG00000142657	6.56422	0.00104618	266127	2453.22	1.74691e+06	5226	PGD
ENSG00000178685	1.60187	6.06122e-11	1.08523e+06	347652	1.7384e+06	84875	PARP10
ENSG00000198851	3.26727	4.59765e-28	524202	53259.8	1.71271e+06	916	CD3E
ENSG00000207725	4.06255	9.86746e-19	405074	23601.4	1.64564e+06	407007	MIR222
ENSG00000178999	1.19223	5.94433e-13	1363270	591568	1.62534e+06	9212	AURKB
ENSG00000183530	-1.33348	8.33575e-05	1.17044e+06	2.9374e+06	1.56075e+06	253143	PRR14L
ENSG00000101752	3.04441	3.89333e-15	511087	59754.3	1.55596e+06	57534	MIB1
ENSG00000197603	-1.29572	1.15362e-10	1.19869e+06	2.91726e+06	1.55317e+06	65250	C5orf42
ENSG00000240194	1.44763	4.51372e-14	1.04966e+06	379035	1.51952e+06	643160	CYMP
ENSG00000132781	-3.2022	9.31871e-09	472820	4385269	1.51406e+06	4595	MUTYH
ENSG00000228224	3.29132	5.93427e-12	441851	43886	1.45427e+06	NA	NACAP1
ENSG00000127419	1.51792	2.25221e-18	939052	324251	1.42541e+06	84286	TMEM175
ENSG00000197565	8.16906	0.00279109	174342	662.39	1.42421e+06	1288	COL4A6
ENSG00000006007	1.63075	0.000164185	873201	278324	1.42397e+06	51573	GDE1
ENSG00000101935	-1.64627	9.56387e-13	858162	2.65195e+06	1.41277e+06	9949	AMMECR1
ENSG00000180638	-1.03383	3.77479e-05	1.36526e+06	2.85992e+06	1.41144e+06	146802	SLC47A2
ENSG00000198028	1.35899	1.60124e-14	1.00033e+06	382961	1.35944e+06	147741	ZNF560
ENSG00000164692	-1.52386	7.29069e-07	872428	2.58833e+06	1.32946e+06	1278	COL1A2
ENSG00000113905	-1.04523	0.00153391	1.26466e+06	2.68287e+06	1.32186e+06	3273	HRG
ENSG00000233570	-1.1727	1.29824e-06	1.07472e+06	2.47284e+06	1.26033e+06	100996597	LINC00690
ENSG00000174173	2.801	6.234e-12	448824	61230.7	1.25716e+06	54931	TRMT10C
ENSG00000196422	1.31895	4.51372e-14	930162	366900	1.22683e+06	9858	PPP1R26
ENSG00000136738	-1.96445	5.37945e-05	620932	2.45594e+06	1.21979e+06	8027	STAM
ENSG00000166986	1.75611	2.7249e-09	687136	198451	1.20668e+06	4141	MARS
ENSG00000111716	1.03283	7.30554e-06	1.14253e+06	546468	1.18004e+06	3945	LDHB
ENSG00000100234	-2.07894	2.13531e-05	564709	2.53929e+06	1.174e+06	7078	TIMP3
ENSG00000266750	8.63978	1.40694e-16	135369	368.683	1.16956e+06	100616285	MIR4645
ENSG00000063176	1.3262	0.000152525	868116	329740	1.1513e+06	56848	SPHK2
ENSG00000165494	1.04557	1.0583e-12	1.09545e+06	523557	1.14537e+06	51585	PCF11
ENSG00000235890	-1.34157	7.0547e-05	853450	2.22297e+06	1.14496e+06	NA	TSPEAR-AS1
ENSG00000132763	-1.51942	0.00031586	749583	2.18221e+06	1.13893e+06	25974	MMACHC
ENSG00000110975	1.56082	7.54026e-16	720051	239814	1.12387e+06	341359	SYT10
ENSG00000147400	1.29676	3.15124e-07	858724	336526	1.11356e+06	1069	CETN2
ENSG00000171450	-1.92067	8.39796e-10	573746	2.11665e+06	1.10198e+06	8941	CDK5R2
ENSG00000130803	-1.43029	8.4193e-06	765094	2.09759e+06	1.09431e+06	57693	ZNF317
ENSG00000186517	-1.50747	5.70812e-08	720522	2.10044e+06	1.08616e+06	257106	ARHGAP30
ENSG00000263926	2.99637	4.59236e-12	357003	43827.5	1.06972e+06	100616413	MIR4462
ENSG00000207800	3.61974	6.24142e-30	294675	23914	1.06665e+06	574507	MIR504
ENSG00000223756	1.44143	1.18212e-20	734711	266672	1.05904e+06	NA	TSSC2
ENSG00000125571	1.06739	8.31095e-10	991608	464519	1.05843e+06	27178	IL37
ENSG00000124313	-3.14048	1.41831e-09	336529	3.30901e+06	1.05686e+06	23096	IQSEC2
ENSG00000200801	2.28412	5.57046e-09	462256	95657.8	1.05585e+06	100036565	SNORD115-28
ENSG00000125818	5.09351	3.97205e-16	207239	5901.29	1.05557e+06	9491	PSMF1
ENSG00000129595	1.06399	1.8858e-08	978648	461664	1.04127e+06	64097	EPB41L4A
ENSG00000164828	-1.17652	1.87118e-10	877596	1.97949e+06	1.03251e+06	23353	SUN1
ENSG00000162896	1.06607	6.91638e-08	966818	461292	1.0307e+06	5284	PIGR
ENSG00000252906	2.95034	2.33324e-23	349021	43165.6	1.02973e+06	677679	SCARNA3
ENSG00000177182	1.49917	1.38578e-08	677273	240479	1.01534e+06	157807	CLVS1
ENSG00000084112	1.31801	0.000320043	757451	294612	998331	54434	SSH1
ENSG00000170166	3.18322	1.52735e-32	313451	34103.9	997785	3233	HOXD4
ENSG00000129562	1.18185	6.11274e-12	826627	357812	976949	1603	DAD1
ENSG00000138613	5.75865	1.82542e-11	168064	3063.27	967824	83464	APH1B
ENSG00000242599	-2.28957	2.62328e-10	418758	2.0104e+06	958776	100130935	CSAG4
ENSG00000175564	1.77891	7.66523e-17	533787	152458	949559	7352	UCP3
ENSG00000180259	4.47185	6.79479e-31	212166	9552.27	948772	NA	PRNT
ENSG00000095794	10.5414	3.94142e-11	89354.2	54.6829	941921	1390	CREM
ENSG00000181404	3.45722	2.75e-33	271791	24541.1	939642	100287171	WASHC1
ENSG00000161920	-1.12359	1.13324e-07	834999	1.83691e+06	938194	400569	MED11
ENSG00000171045	2.51372	1.48968e-08	371730	64631.7	934427	203062	TSNARE1
ENSG00000129455	1.23218	7.54801e-15	747437	315263	920974	11202	KLK8
ENSG00000171786	3.74851	3.29451e-16	245660	17928.3	920861	4807	NHLH1
ENSG00000182621	-1.51954	1.14904e-15	595658	1.69295e+06	905128	23236	PLCB1
ENSG00000229643	7.99275	2.73485e-06	112474	429.341	898976	100873964	LINC00280
ENSG00000181754	1.22788	2.14678e-05	723389	307687	888235	57463	AMIGO1
ENSG00000197134	3.03742	2.03174e-11	290622	34447	882743	113835	ZNF257
ENSG00000186297	1.57426	0.000445057	549067	182334	864375	2558	GABRA5
ENSG00000164924	1.96603	9.32684e-15	426827	109873	839156	7534	YWHAZ
ENSG00000119685	-1.13588	4.91245e-08	716497	1.57568e+06	813854	23093	TTLL5
ENSG00000067533	-1.03459	3.7785e-05	786241	1.58956e+06	813441	51018	RRP15
ENSG00000263354	3.65862	2.09432e-20	221204	17763.2	809300	100847002	MIR5011
ENSG00000171453	1.99097	1.15084e-07	402139	99761.9	800646	9533	POLR1C
ENSG00000088179	-1.78522	0.000211362	443904	1.59593e+06	792466	5775	PTPN4
ENSG00000261105	1.35122	1.2351e-10	583784	225998	788822	101927155	LMO7-AS1
ENSG00000266206	1.04978	5.4435e-11	745642	352970	782758	100500870	MIR3926-1
ENSG00000141642	3.43132	1.50572e-24	227193	21167.9	779571	55520	ELAC1
ENSG00000140391	1.50913	9.19291e-14	516037	180051	778766	10099	TSPAN3
ENSG00000163803	1.23578	1.18366e-10	629019	261527	777331	151056	PLB1
ENSG00000189120	1.947	1.67932e-15	395097	102599	769254	80320	SP6
ENSG00000200680	3.40554	1.98518e-33	225685	21241	768581	100033441	SNORD115-4
ENSG00000265991	1.97727	9.33592e-09	385137	100426	761519	100616231	MIR4519
ENSG00000168939	-2.11124	1.12686e-11	360367	1.46751e+06	760821	10251	SPRY3
ENSG00000044012	-2.03767	3.41488e-08	371023	1.51777e+06	756023	2981	GUCA2B
ENSG00000163714	-1.19876	9.88872e-09	627769	1.43941e+06	752543	23350	U2SURP
ENSG00000233276	2.66303	1.10132e-11	280497	42164.3	746972	2876	GPX1
ENSG00000158286	1.90587	0.000909411	388779	93480.7	740961	388591	RNF207
ENSG00000188282	-1.51075	4.12513e-06	485323	1.43673e+06	733203	285180	RUFY4
ENSG00000183172	-1.23841	6.09804e-08	589312	1.37439e+06	729807	91689	SMDT1
ENSG00000179431	1.38383	5.12179e-09	525097	201433	726646	24147	FJX1
ENSG00000242220	2.40986	1.67518e-19	300771	54653.2	724817	140290	TCP10L
ENSG00000082929	2.94044	1.71028e-12	243815	30894.1	716923	10141	LINC01587
ENSG00000143772	1.41359	4.09044e-11	503404	182374	711605	3707	ITPKB
ENSG00000104472	1.6608	1.06493e-05	427464	131861	709931	54108	CHRAC1
ENSG00000082805	1.87675	1.14108e-28	374101	100152	702093	23085	ERC1
ENSG00000196588	-2.12503	1.31516e-06	329688	1.50263e+06	700595	57591	MKL1
ENSG00000188959	-1.58777	9.23963e-06	435171	1.33698e+06	690952	401546	C9orf152
ENSG00000126778	1.79923	9.97128e-11	379198	107124	682264	6495	SIX1
ENSG00000186815	2.56433	1.14886e-08	262282	45618.8	672579	53373	TPCN1
ENSG00000089127	-1.01977	8.03446e-08	658618	1.34569e+06	671642	4938	OAS1
ENSG00000137804	1.20738	2.21437e-05	546282	236766	659573	51203	NUSAP1
ENSG00000124208	-1.04048	3.31886e-07	630603	1.27084e+06	656131	387522	TMEM189-UBE2V1
ENSG00000205517	-1.11537	2.89234e-09	588168	1.28969e+06	656026	57139	RGL3
ENSG00000163071	1.4972	4.34922e-06	437336	155875	654778	132671	SPATA18
ENSG00000159403	1.89103	4.43508e-07	342064	90055	646854	715	C1R
ENSG00000277785	2.37529	1.57417e-20	269983	53067.3	641288	NA	SNORD116-21
ENSG00000232416	2.34341	1.94958e-06	271521	49937.4	636286	60467	BPESC1
ENSG00000090989	2.28269	3.37545e-15	273511	54230	624343	55763	EXOC1
ENSG00000101856	-1.10044	0.000225172	565509	1.23632e+06	622309	10857	PGRMC1
ENSG00000106484	1.23096	4.95627e-13	505029	211061	621671	4232	MEST
ENSG00000139163	3.74123	1.15301e-42	163006	12083.5	609842	55500	ETNK1
ENSG00000110328	1.22997	8.72774e-16	490853	204798	603735	374378	GALNT18
ENSG00000100342	-1.29348	7.24366e-06	466542	1.16058e+06	603461	8542	APOL1
ENSG00000084764	-2.15947	1.62855e-20	276596	1.2443e+06	597299	22924	MAPRE3
ENSG00000176410	-1.07821	4.83762e-08	552334	1.16332e+06	595531	84277	DNAJC30
ENSG00000131095	2.08504	3.45094e-05	283518	81519.5	591148	2670	GFAP
ENSG00000165092	-2.0745	3.50378e-12	282963	1.17095e+06	587006	216	ALDH1A1
ENSG00000082175	-1.46476	3.0345e-07	397163	1.13036e+06	581748	5241	PGR
ENSG00000168488	1.15512	5.88912e-08	502536	222413	580489	11273	ATXN2L
ENSG00000185940	1.26487	5.60773e-15	455789	188329	576513	439915	KRTAP5-5
ENSG00000173728	2.06613	3.8201e-17	277997	66292.5	574378	200159	C1orf100
ENSG00000187550	2.26484	1.77559e-06	253505	50927.6	574149	646643	SBK2
ENSG00000116455	1.23168	0.000111751	464064	200179	571579	79084	WDR77
ENSG00000170848	4.75499	4.60613e-06	120075	3943.07	570958	5675	PSG6
ENSG00000166796	7.43274	1.29197e-07	76611	402.707	569430	3948	LDHC
ENSG00000177646	-2.63839	2.38459e-15	215364	1.35115e+06	568214	28976	ACAD9
ENSG00000124215	1.19842	3.7589e-07	466421	196814	558970	60437	CDH26
ENSG00000223569	-1.90068	2.67699e-14	292505	1.06941e+06	555957	100288520	USP17L15
ENSG00000174748	3.61734	7.89112e-34	153668	12498.1	555872	6138	RPL15
ENSG00000176584	2.29544	4.25522e-09	241954	47479.2	555391	375940	DMBT1P1
ENSG00000246985	-1.9838	4.36272e-08	279662	1.09019e+06	554794	144481	SOCS2-AS1
ENSG00000206727	2.91527	6.26726e-24	188224	24783.4	548726	100033421	SNORD116-9
ENSG00000125652	1.233	1.87641e-07	444861	188446	548513	84266	ALKBH7
ENSG00000165684	-1.5791	1.56231e-09	344854	1.01432e+06	544560	6621	SNAPC4
ENSG00000215808	1.04241	1.27123e-07	522107	247165	544248	339535	LINC01139
ENSG00000185040	-1.97262	2.54323e-10	274889	1.15738e+06	542251	100505767	SPDYE16
ENSG00000170983	1.6174	7.84271e-14	334412	107660	540877	NA	LINC00208
ENSG00000114423	1.65601	0.000442675	326105	106732	540032	868	CBLB
ENSG00000269699	-1.2054	2.54435e-05	446964	1.03755e+06	538772	23619	ZIM2
ENSG00000229292	5.88604	2.38346e-11	90896.3	1495.2	535019	729974	RFPL4AL1
ENSG00000140479	3.78855	3.44826e-32	139926	10085.9	530117	5046	PCSK6
ENSG00000204278	1.18591	2.56766e-07	440398	192006	522273	283999	TMEM235
ENSG00000176231	-1.04463	0.00371995	498185	1.02356e+06	520419	126541	OR10H4
ENSG00000163216	3.98081	2.95752e-35	130523	8121.29	519586	6703	SPRR2D
ENSG00000145780	4.11563	2.25723e-08	126084	7861.1	518914	56929	FEM1C
ENSG00000067225	2.38347	1.03949e-08	216941	39903.1	517072	5315	PKM
ENSG00000163635	1.17801	1.90793e-12	437861	190343	515806	6314	ATXN7
ENSG00000108107	11.2929	4.06105e-07	45585.3	17.4146	514792	6158	RPL28
ENSG00000172425	-1.22553	1.71325e-06	416083	975082	509923	143941	TTC36
ENSG00000106397	1.15075	4.99844e-12	439399	194261	505638	8985	PLOD3
ENSG00000101442	1.26842	5.65018e-15	398597	162918	505587	79913	ACTR5
ENSG00000147231	4.19991	2.05498e-06	119998	6224.49	503982	55086	CXorf57
ENSG00000131203	5.83046	3.16896e-12	86325.1	1570.17	503315	3620	IDO1
ENSG00000182359	3.61549	4.34634e-21	138427	10673.5	500483	143879	KBTBD3
ENSG00000169789	1.81382	2.25221e-18	275672	77390.8	500021	9081	PRY
ENSG00000036565	-1.54782	2.30558e-10	321953	942622	498323	6570	SLC18A1
ENSG00000164935	-1.67572	3.9292e-06	294055	971223	492754	81501	DCSTAMP
ENSG00000173567	2.48878	7.09019e-24	197171	34850.6	490715	165082	ADGRF3
ENSG00000168566	3.37511	3.64222e-29	143911	13882	485713	154007	SNRNP48
ENSG00000203808	4.43857	5.8879e-12	109100	5179.9	484251	154442	BVES-AS1
ENSG00000208028	7.17321	3.42459e-10	66667.5	462.244	478220	693201	MIR616
ENSG00000170790	3.65162	2.13421e-06	129811	9634.22	474019	341276	OR10A2
ENSG00000156650	-1.25551	3.69799e-11	376121	893560	472223	23522	KAT6B
ENSG00000183479	2.38706	4.90183e-11	195543	36193	466772	11219	TREX2
ENSG00000092208	-3.79815	1.36697e-13	122117	1.70695e+06	463818	8487	GEMIN2
ENSG00000165059	1.29495	1.79213e-11	358140	143170	463775	5568	PRKACG
ENSG00000141858	1.7827	0.00549974	259442	68741.1	462507	NA	SAMD1
ENSG00000163521	1.05768	9.32684e-15	434993	206019	460082	79411	GLB1L
ENSG00000135686	1.36611	1.12831e-16	336347	127857	459486	79786	KLHL36
ENSG00000196792	1.52151	8.23329e-19	301635	104203	458940	29966	STRN3
ENSG00000129028	3.79287	2.39473e-36	120716	8727.39	457860	56906	THAP10
ENSG00000141959	2.58549	9.49468e-23	175844	29179.1	454642	5211	PFKL
ENSG00000117791	-1.68779	5.15079e-06	269159	848274	454284	54996	MARC2
ENSG00000069431	1.45362	3.68586e-14	312482	110727	454230	10060	ABCC9
ENSG00000173581	1.00541	9.29937e-05	450442	221012	452877	29903	CCDC106
ENSG00000207728	3.18307	9.54907e-13	140114	14765.5	445992	693123	MIR449B
ENSG00000255867	1.09443	1.80023e-10	406479	189287	444863	100874249	DENND5B-AS1
ENSG00000163512	3.24357	3.87718e-12	137138	13821.1	444817	64343	AZI2
ENSG00000188760	1.17435	2.02323e-11	375870	164056	441403	130612	TMEM198
ENSG00000168802	2.39113	1.76165e-18	184380	34933.2	440876	54921	CHTF8
ENSG00000179044	-1.08051	4.39888e-06	407582	898690	440395	283849	EXOC3L1
ENSG00000196368	5.62988	2.06502e-11	77836.3	1514.34	438209	55190	NUDT11
ENSG00000239305	6.23157	5.3595e-06	69879.9	896.366	435461	7844	RNF103
ENSG00000122417	1.06538	2.99138e-11	405902	190030	432442	57489	ODF2L
ENSG00000142082	1.14906	3.63433e-14	374469	168028	430286	23410	SIRT3
ENSG00000256269	-2.33233	1.29697e-15	184358	917520	429983	3145	HMBS
ENSG00000196152	4.18721	6.0774e-10	102425	5379.59	428875	7633	ZNF79
ENSG00000233540	6.4357	3.99088e-05	66454	719.805	427678	100874284	DNM3-IT1
ENSG00000185658	-2.13573	4.12711e-07	198548	906468	424045	54014	BRWD1
ENSG00000230373	-1.20673	1.52733e-06	350267	785283	422679	642402	GOLGA6L5P
ENSG00000148572	1.74543	8.58089e-20	242113	72218.5	422590	29982	NRBF2
ENSG00000069329	1.62523	3.45291e-16	256393	82050.2	416698	55737	VPS35
ENSG00000009694	1.38516	5.19895e-08	300796	115103	416651	10178	TENM1
ENSG00000103811	2.25163	5.57984e-31	184915	38892.8	416360	1512	CTSH
ENSG00000217442	1.67534	8.32526e-11	247593	77223.5	414803	644186	SYCE3
ENSG00000196187	3.51453	8.86593e-21	117028	10132.4	411300	9725	TMEM63A
ENSG00000129245	2.56719	4.58913e-11	159873	26010	410424	9513	FXR2
ENSG00000181541	2.38552	3.55907e-07	171816	31949	409871	10586	MAB21L2
ENSG00000213412	2.59889	1.45403e-11	156706	25203	407264	NA	HNRNPA1P33
ENSG00000173801	1.62277	5.57872e-05	250043	80452	405764	3728	JUP
ENSG00000273700	1.15013	0.000251847	350030	155534	402579	102465455	MIR6760
ENSG00000078747	2.81051	1.912e-10	141173	19660	396767	83737	ITCH
ENSG00000144597	-1.76916	9.38459e-13	223695	753712	395753	85403	EAF1
ENSG00000162337	7.44883	6.59326e-12	53093.5	293.561	395484	4041	LRP5
ENSG00000205038	4.28183	1.80124e-27	92258.6	4787.12	395035	93035	PKHD1L1
ENSG00000205883	5.90895	8.25751e-10	65735.1	1070.1	388426	613209	DEFB135
ENSG00000072858	-1.02494	1.65144e-05	377370	785164	386784	54847	SIDT1
ENSG00000260428	2.77521	2.62617e-14	138806	20260.5	385216	642658	SCX
ENSG00000198176	5.43681	1.57496e-06	69831.7	1595.63	379662	7027	TFDP1
ENSG00000211520	6.16396	2.15519e-12	61537.7	744.976	379316	100126319	MIR216B
ENSG00000110768	5.34218	1.75314e-28	70903	1702	378776	2965	GTF2H1
ENSG00000111785	7.78683	4.11492e-11	48599.5	244.976	378436	55188	RIC8B
ENSG00000172216	1.06016	9.74674e-05	356798	170061	378263	1051	CEBPB
ENSG00000188501	2.633	3.00173e-07	143650	22789.8	378230	197021	LCTL
ENSG00000136688	9.6646	1.05528e-05	38501.2	52.4878	372099	56300	IL36G
ENSG00000136021	-1.18877	0.000218656	312174	698011	371104	55681	SCYL2
ENSG00000182378	1.27941	2.38209e-11	289686	115821	370628	55344	PLCXD1
ENSG00000231216	5.24602	1.41263e-07	70002.4	1771.12	367234	100093698	GS1-600G8.3
ENSG00000163491	1.40401	2.54402e-12	261273	98503.5	366831	152110	NEK10
ENSG00000147168	1.25609	2.32402e-07	285630	116561	358778	3561	IL2RG
ENSG00000249073	-1.1109	5.75051e-07	321257	681922	356884	105664404	WSPAR
ENSG00000163646	1.10341	3.74587e-13	321009	145993	354204	7401	CLRN1
ENSG00000108176	5.09266	1.16473e-10	69144.3	1936.05	352128	56521	DNAJC12
ENSG00000126822	3.10682	1.53428e-35	112587	13079.8	349787	26030	PLEKHG3
ENSG00000080839	3.32397	2.73061e-10	105120	10915.2	349416	5933	RBL1
ENSG00000166856	1.01937	1.38182e-12	341548	166909	348163	11318	GPR182
ENSG00000125398	-2.27522	2.0419e-11	152528	747120	347034	6662	SOX9
ENSG00000183036	2.61568	2.49243e-09	132492	21273.1	346556	5121	PCP4
ENSG00000112214	6.09947	2.17823e-07	56792.6	799.146	346405	9457	FHL5
ENSG00000073578	3.38135	2.12577e-31	101631	9738.17	343649	6389	SDHA
ENSG00000164221	3.4019	1.52735e-32	100959	9554.51	343453	153733	CCDC112
ENSG00000178623	1.62068	6.41648e-06	211906	68301.5	343431	2859	GPR35
ENSG00000169087	-1.51046	0.00224702	227199	598071	343174	79663	HSPBAP1
ENSG00000072401	1.70397	2.28493e-05	199909	55991.4	340638	7321	UBE2D1
ENSG00000173207	-1.14672	7.77712e-09	294546	642278	337761	1163	CKS1B
ENSG00000198783	1.02095	0.000117131	326025	162738	332854	91603	ZNF830
ENSG00000105176	2.20258	7.72061e-13	150808	31924.1	332165	8725	URI1
ENSG00000183542	-1.05998	4.8871e-06	312619	653312	331369	8302	KLRC4
ENSG00000179922	2.55139	1.28019e-07	129790	21561.4	331145	147808	ZNF784
ENSG00000134046	-1.75205	2.33922e-13	186954	642229	327553	8932	MBD2
ENSG00000269891	1.76588	3.65055e-11	185285	52406.3	327193	NA	ARHGAP19-SLIT1
ENSG00000163807	7.56801	8.10099e-10	43018.6	226	325565	57456	KIAA1143
ENSG00000057657	-4.33354	1.16196e-16	74863.5	1.51056e+06	324424	639	PRDM1
ENSG00000004975	1.56685	1.80891e-06	204355	71664.8	320195	1856	DVL2
ENSG00000252277	6.19562	9.8297e-11	51521.4	706.976	319207	100873856	SNORD116-30
ENSG00000146521	4.54268	4.51936e-09	69986.1	3085.95	317925	26238	LINC01558
ENSG00000183258	3.76113	1.85657e-28	84270.2	6159	316952	51428	DDX41
ENSG00000147889	1.49879	4.12796e-15	210842	73464.4	316008	1029	CDKN2A
ENSG00000169047	2.12748	3.26049e-19	147835	33715.7	314515	3667	IRS1
ENSG00000196415	2.2671	3.45235e-22	138093	28635	313070	5657	PRTN3
ENSG00000185900	-1.71083	3.45094e-05	182823	600665	312779	84197	POMK
ENSG00000043093	3.69969	5.43402e-32	84195	6385.39	311495	54165	DCUN1D1
ENSG00000175294	3.8189	1.01076e-37	81522.1	5640.39	311325	117144	CATSPER1
ENSG00000074590	3.1464	1.06584e-11	97670.6	9966.71	307310	9891	NUAK1
ENSG00000265145	1.44582	0.002003	210210	75940.1	303925	26796	SNORD53
ENSG00000188316	1.52497	0.00160641	198454	67234.2	302636	387712	ENO4
ENSG00000111269	-3.9368	6.89639e-14	76322	1.17883e+06	300464	1389	CREBL2
ENSG00000263583	-1.91719	2.05124e-14	156341	580686	299735	100616277	MIR4522
ENSG00000183486	2.66442	4.92631e-07	112444	17737.7	299598	4600	MX2
ENSG00000121897	4.20325	1.69717e-05	70072.9	3696.29	294534	11019	LIAS
ENSG00000266287	-1.42633	1.05367e-08	204447	540504	291608	100500886	MIR3683
ENSG00000166454	1.0614	1.50432e-14	274735	129475	291605	23300	ATMIN
ENSG00000135763	-1.64695	7.61222e-13	176608	553372	290863	9816	URB2
ENSG00000169976	1.35162	1.34323e-09	214598	83260.5	290055	83443	SF3B5
ENSG00000176692	1.1351	1.80415e-11	254627	113705	289026	2303	FOXC2
ENSG00000105778	2.08709	1.57434e-06	137822	29596.2	287646	23080	AVL9
ENSG00000164850	2.2903	6.21637e-10	125215	24951.6	286781	2852	GPER1
ENSG00000205442	3.52695	9.10277e-06	80774.1	6622.73	284886	100129669	IZUMO3
ENSG00000171227	1.21429	0.000369371	234150	102652	284327	140738	TMEM37
ENSG00000198691	3.53271	9.92054e-39	80469.3	6860.71	284275	24	ABCA4
ENSG00000237872	2.32314	5.86977e-06	122041	23406.2	283519	645682	POU5F1P4
ENSG00000138621	1.72686	3.27741e-09	163902	48332.9	283036	60490	PPCDC
ENSG00000138115	1.36374	1.76787e-12	206537	80523.2	281663	1558	CYP2C8
ENSG00000170248	2.20463	0.0034067	127749	27041.3	281640	10015	PDCD6IP
ENSG00000237401	1.49226	7.45518e-07	188641	62698.5	281503	100505964	LINC01304
ENSG00000213366	-1.26044	5.50027e-12	221203	523875	278814	2946	GSTM2
ENSG00000197956	4.4255	1.10542e-19	62548.7	2926.02	276809	6277	S100A6
ENSG00000196597	1.12391	2.62121e-13	246203	112633	276711	158431	ZNF782
ENSG00000167543	5.62267	4.77249e-08	49136.8	949.366	276280	90313	TP53I13
ENSG00000164172	2.33563	5.51245e-29	118041	23102	275700	4338	MOCS2
ENSG00000148303	3.14775	7.26036e-10	87507.6	10021.9	275452	6130	RPL7A
ENSG00000198723	1.14668	1.33583e-06	237908	105599	272805	374877	TEX45
ENSG00000064225	4.1397	3.00075e-26	64717.4	3651.49	267911	10402	ST3GAL6
ENSG00000175463	3.03444	3.14236e-09	86802.4	10388	263397	374403	TBC1D10C
ENSG00000185163	-2.46019	2.07785e-08	106484	587056	261970	317781	DDX51
ENSG00000264616	1.97524	1.33472e-17	132319	33069	261362	100616434	MIR4755
ENSG00000171428	3.20281	1.98518e-33	80928.5	8783.54	259199	9	NAT1
ENSG00000237941	3.2013	3.24233e-18	80850.3	8660.41	258826	55539	KCNQ1DN
ENSG00000188039	2.90918	1.14114e-22	88802.1	11731.9	258341	284434	NWD1
ENSG00000103381	-1.33809	2.71981e-05	192378	459485	257419	55313	CPPED1
ENSG00000239653	3.16983	2.28379e-14	81081	8624.17	257013	100507062	PSMD6-AS2
ENSG00000196139	1.08157	2.2559e-12	237473	111644	256844	8644	AKR1C3
ENSG00000256751	1.04123	2.56853e-10	246157	118208	256307	NA	PLBD1-AS1
ENSG00000158186	6.42213	8.26201e-22	39844.3	459.854	255886	22808	MRAS
ENSG00000233806	3.59794	2.41085e-15	71017.6	5665.8	255517	101927289	LINC01237
ENSG00000131400	1.89371	1.71338e-06	134028	36587.7	253810	9476	NAPSA
ENSG00000058091	1.09921	0.000121177	227927	103562	250540	5218	CDK14
ENSG00000178163	-1.17087	2.81035e-06	213884	483141	250430	85460	ZNF518B
ENSG00000085433	6.83433	2.91063e-14	36611	317.634	250212	22911	WDR47
ENSG00000136379	1.0422	4.4715e-08	239886	116579	250010	58489	ABHD17C
ENSG00000135624	2.98512	2.18026e-23	82909.7	10454	247496	10574	CCT7
ENSG00000239697	1.1348	8.65995e-13	217986	98287.6	247371	8742	TNFSF12
ENSG00000163600	1.50772	6.1052e-23	162832	56202.5	245505	29851	ICOS
ENSG00000119242	4.39622	9.45485e-44	55609.9	2634.78	244473	80212	CCDC92
ENSG00000138829	4.41534	3.4546e-17	55084.9	2593.2	243219	2201	FBN2
ENSG00000166448	1.12111	5.00718e-14	216809	97877.4	243068	222865	TMEM130
ENSG00000186638	7.23229	0.000284489	33390.4	253.024	241489	347240	KIF24
ENSG00000038219	2.79165	1.54531e-07	86335.3	11913.5	241018	259282	BOD1L1
ENSG00000100523	6.934	5.86518e-05	34427.5	294.756	238720	80821	DDHD1
ENSG00000187742	1.79895	1.04689e-20	132526	38611.8	238408	79048	SECISBP2
ENSG00000067829	1.05404	0.00633009	225771	106254	237972	3421	IDH3G
ENSG00000127334	1.98502	1.65003e-14	118671	30323.1	235563	8445	DYRK2
ENSG00000229404	-1.18529	2.25723e-08	198711	450816	235530	170425	LINC00858
ENSG00000080561	4.15896	9.79737e-20	56101.5	3063.29	233324	11043	MID2
ENSG00000122873	7.98025	1.37459e-05	29221.6	115.707	233196	55847	CISD1
ENSG00000178605	1.52135	3.30012e-19	152938	53416.1	232672	8225	GTPBP6
ENSG00000184988	-1.1507	0.0077175	200434	459727	230639	113277	TMEM106A
ENSG00000163132	5.91245	1.36288e-07	38959.4	629.61	230345	4487	MSX1
ENSG00000007168	-1.95987	5.59205e-13	117126	458486	229551	5048	PAFAH1B1
ENSG00000174607	1.20888	8.24793e-11	189568	79669.4	229164	7368	UGT8
ENSG00000169136	2.35554	2.0276e-05	97113.3	17744.1	228755	22809	ATF5
ENSG00000163781	2.13178	8.43771e-23	107236	24120.3	228604	11073	TOPBP1
ENSG00000139266	-1.8781	1.46997e-14	121354	457435	227915	92979	MARCH9
ENSG00000165623	2.86371	6.27173e-39	79573.5	10784.5	227876	221044	UCMA
ENSG00000176225	-1.19237	0.00336801	190466	441629	227105	25914	RTTN
ENSG00000238793	-1.08602	2.64734e-05	207116	439210	224932	101340251	SNORD124
ENSG00000068024	2.91048	1.90812e-20	77244.7	10561.6	224819	9759	HDAC4
ENSG00000169071	1.25316	2.50012e-09	179225	73757.8	224596	4920	ROR2
ENSG00000121691	-1.50665	2.12842e-06	148573	424109	223848	847	CAT
ENSG00000165672	2.26601	1.31795e-26	98755.5	20065.8	223781	10935	PRDX3
ENSG00000197599	1.59717	1.3938e-06	138341	45404.4	220953	645811	CCDC154
ENSG00000137752	3.04087	3.65795e-27	72456.9	8838.78	220332	834	CASP1
ENSG00000078699	4.33986	2.4697e-39	50764	2518.41	220308	9139	CBFA2T2
ENSG00000168958	2.07154	1.55006e-09	105589	25238.3	218733	56947	MFF
ENSG00000173327	-2.79878	9.26367e-21	77974.2	539340	218233	4296	MAP3K11
ENSG00000120659	-1.12125	4.40637e-07	194500	411928	218084	8600	TNFSF11
ENSG00000136828	2.68176	0.000685362	81094.1	12195.1	217475	9649	RALGPS1
ENSG00000135919	-1.01874	2.39306e-06	212887	428042	216878	5270	SERPINE2
ENSG00000166257	2.08079	2.38705e-06	103701	22588.7	215780	55800	SCN3B
ENSG00000208000	-1.48982	3.71899e-06	144472	408000	215236	574514	MIR509-1
ENSG00000111405	6.87055	0.000497984	31291.8	259.268	214992	8909	ENDOU
ENSG00000125691	5.93121	9.09928e-07	36182.7	574.805	214607	9349	RPL23
ENSG00000186440	2.38443	2.21454e-22	89725.4	17160.6	213944	128366	OR6P1
ENSG00000132872	-1.25565	4.23949e-05	169315	404811	212600	6860	SYT4
ENSG00000224281	1.25256	7.39e-08	169531	70144.4	212347	100303728	SLC25A5-AS1
ENSG00000172922	-1.11052	6.31266e-06	191060	416382	212177	84153	RNASEH2C
ENSG00000257950	1.09645	2.30831e-07	193318	88848	211963	NA	P2RX5-TAX1BP3
ENSG00000110723	1.26789	1.36623e-05	166181	70494.2	210700	23086	EXPH5
ENSG00000241359	-3.41102	2.00749e-16	61410.9	664187	209474	100874016	SYNPR-AS1
ENSG00000135698	1.37528	6.63115e-18	152273	58206.1	209417	10200	MPHOSPH6
ENSG00000129514	1.17472	2.07281e-14	177323	77223.6	208306	3169	FOXA1
ENSG00000230292	3.54523	5.39557e-13	58753.5	4511.59	208295	100862679	NAALADL2-AS3
ENSG00000161533	1.55023	1.38219e-20	134021	45126.7	207763	51	ACOX1
ENSG00000140406	2.6476	9.82997e-23	78363.5	12570.4	207475	59274	TLNRD1
ENSG00000197838	1.96045	9.97172e-10	104939	25131.8	205727	1553	CYP2A13
ENSG00000207946	1.02229	0.000222758	200319	99525.4	204784	574490	MIR516B1
ENSG00000169925	-1.0842	6.56942e-07	188689	406908	204576	8019	BRD3
ENSG00000167968	1.95353	7.32282e-08	104708	26398.4	204550	1775	DNASE1L2
ENSG00000228794	2.95911	2.39579e-32	68897.2	8728.71	203875	643837	LINC01128
ENSG00000107317	2.69012	1.43689e-09	75379.4	11258.3	202780	5730	PTGDS
ENSG00000119772	-1.13637	2.85293e-05	177760	387559	202001	1788	DNMT3A
ENSG00000177045	1.84509	8.42249e-15	108997	29447.4	201110	147912	SIX5
ENSG00000168528	1.01126	0.00153391	198474	93811	200708	347735	SERINC2
ENSG00000204428	5.11344	5.93743e-10	38905.7	1130.88	198942	80741	LY6G5C
ENSG00000182405	1.05886	1.06117e-13	187234	87994.4	198255	161779	PGBD4
ENSG00000204252	2.14044	4.9408e-07	92105.8	20150.3	197147	3111	HLA-DOA
ENSG00000206549	1.08132	1.57114e-11	182267	84649.3	197089	NA	PRSS50
ENSG00000235397	-1.35491	4.94861e-11	144912	366688	196343	100874018	EPN2-AS1
ENSG00000186868	-1.48856	1.99268e-12	131787	361762	196172	4137	MAPT
ENSG00000168594	1.56674	6.80556e-14	124154	41215.5	194518	11086	ADAM29
ENSG00000139193	-1.4134	0.00035035	137345	360753	194125	939	CD27
ENSG00000214940	-1.09213	1.5028e-08	176665	381799	192941	101059953	NPIPA8
ENSG00000035664	-1.53055	2.34431e-17	125417	359775	191956	23604	DAPK2
ENSG00000184208	1.86869	2.60211e-16	102461	27602.9	191469	79640	C22orf46
ENSG00000111305	-1.04409	1.67391e-06	182879	366881	190943	83445	GSG1
ENSG00000204396	1.29222	5.35248e-05	147477	59034.9	190573	80737	VWA7
ENSG00000162572	-1.22005	1.12372e-07	155074	363702	189199	6339	SCNN1D
ENSG00000207767	-1.35967	0.00134066	138388	367006	188161	574498	MIR516A1
ENSG00000266721	-1.22149	2.86083e-05	153928	363771	188021	100847016	MIR5695
ENSG00000069248	1.13014	5.31445e-09	166364	73684.9	188014	55746	NUP133
ENSG00000134824	8.0692	1.19572e-11	23270.8	83.2927	187777	9415	FADS2
ENSG00000176922	1.52266	6.35735e-15	122790	42548.9	186967	119692	OR51S1
ENSG00000124491	1.05755	3.20818e-07	176582	84358.4	186744	2162	F13A1
ENSG00000158292	1.06026	5.33186e-11	175126	83955.6	185679	387509	GPR153
ENSG00000107864	1.28585	4.2698e-07	144239	58637.6	185469	22849	CPEB3
ENSG00000104435	1.14401	5.80519e-05	159892	71982.7	182917	11075	STMN2
ENSG00000169905	1.1537	9.38573e-08	158503	71843.7	182864	163590	TOR1AIP2
ENSG00000224652	1.07923	5.94428e-11	169238	78497.3	182648	401109	LINC00885
ENSG00000137154	-1.33971	2.07242e-06	135623	341979	181695	6194	RPS6
ENSG00000277370	1.962	3.56058e-17	91864.5	23780.6	180238	26800	SNORD49A
ENSG00000202526	1.96531	1.34964e-09	91372.5	23108.5	179575	100169764	RNA5S13
ENSG00000140367	1.09802	0.00755189	163461	72387.5	179483	92912	UBE2Q2
ENSG00000136960	2.85259	8.57427e-21	62836	8620.93	179245	5168	ENPP2
ENSG00000079931	7.26204	7.28616e-05	24643	145.878	178958	26002	MOXD1
ENSG00000165006	-1.21425	1.14916e-10	147283	335929	178839	51271	UBAP1
ENSG00000086061	2.84284	5.70214e-10	62692.7	8644.1	178225	3301	DNAJA1
ENSG00000236202	-1.10214	1.20314e-07	160888	344484	177320	100873937	GRM7-AS1
ENSG00000186567	3.22896	4.44546e-31	54643.2	5780.39	176441	56971	CEACAM19
ENSG00000231824	2.09673	4.17852e-10	83930.6	19757.2	175980	642597	AKAIN1
ENSG00000215458	-1.87419	2.46045e-17	93436.6	348715	175118	284837	AATBC
ENSG00000176438	-1.12693	0.000950035	155114	337098	174803	161176	SYNE3
ENSG00000002834	1.25133	4.17229e-15	139063	58409.7	174014	3927	LASP1
ENSG00000165102	2.02542	2.40892e-05	85717.3	21218.4	173613	138050	HGSNAT
ENSG00000170439	1.81145	1.09685e-08	95214.8	26697.4	172477	196410	METTL7B
ENSG00000114316	3.88556	1.64743e-30	44050.6	2921.8	171161	7375	USP4
ENSG00000122912	1.30178	6.23201e-12	131369	53138.8	171013	8034	SLC25A16
ENSG00000125355	1.92032	4.91407e-12	88255.3	22683.3	169478	55026	TMEM255A
ENSG00000160181	2.27163	3.04884e-11	74554.2	15046.1	169360	7032	TFF2
ENSG00000066455	1.06621	1.39721e-07	158493	75292.4	168987	9950	GOLGA5
ENSG00000156466	1.28472	5.22507e-11	131189	53942.3	168541	392255	GDF6
ENSG00000157423	1.79219	2.75164e-07	92284.5	25718.8	165392	54768	HYDIN
ENSG00000243849	9.67638	4.95213e-06	16897.1	21.9024	163503	100874029	CFAP44-AS1
ENSG00000159216	3.44368	3.96399e-10	47320.2	4259.44	162956	861	RUNX1
ENSG00000183576	3.46117	1.44411e-29	47053.1	4263.02	162859	84193	SETD3
ENSG00000169064	5.64962	4.578e-08	28813.7	552.146	162786	79740	ZBBX
ENSG00000177981	1.02601	2.89704e-12	157539	77531.4	161636	140461	ASB8
ENSG00000084234	1.16362	7.0547e-05	138447	61387.3	161100	334	APLP2
ENSG00000162592	-2.16973	7.1276e-12	73970.4	334449	160496	148870	CCDC27
ENSG00000089280	2.4007	9.56861e-17	66669.4	12404.6	160053	2521	FUS
ENSG00000261603	-1.06349	0.000526291	149539	316304	159033	NA	PRSS46
ENSG00000169508	8.48678	0.000517222	18708	51.4146	158770	1880	GPR183
ENSG00000254703	1.25852	5.65729e-07	125586	50737.6	158052	100507392	SENCR
ENSG00000009724	2.84723	3.82773e-10	55444.5	7758.83	157863	10747	MASP2
ENSG00000206072	-1.08627	3.53861e-09	145001	307665	157510	89778	SERPINB11
ENSG00000115155	4.44173	9.70481e-20	35386.8	1650.71	157178	9381	OTOF
ENSG00000204873	3.65667	2.82062e-30	42958.7	3370.71	157086	83900	KRTAP9-3
ENSG00000206448	1.06135	2.58283e-11	147611	69606.7	156667	NA	PPIAP30
ENSG00000247708	-1.26313	6.96459e-06	123837	293811	156422	100507266	STX18-AS1
ENSG00000119979	6.99508	1.09321e-08	22354.2	164.951	156369	404636	FAM45A
ENSG00000179520	2.38726	8.54008e-25	65472.2	12511	156299	246213	SLC17A8
ENSG00000070404	3.34097	2.81522e-29	46694.7	4593.34	156005	10272	FSTL3
ENSG00000130348	1.05032	6.45725e-10	148186	71780.7	155644	55278	QRSL1
ENSG00000263742	-1.37135	0.000188881	112660	282154	154497	100422953	MIR3165
ENSG00000112033	-1.66829	1.12399e-15	92046.6	291288	153560	5467	PPARD
ENSG00000011243	2.19641	0.00113426	69542.2	14506.7	152743	26993	AKAP8L
ENSG00000163788	1.2343	3.09703e-17	123323	51427.2	152218	54861	SNRK
ENSG00000182652	-1.11546	9.18042e-11	135120	289819	150721	441669	OR4Q3
ENSG00000121064	-1.19473	4.90619e-06	125889	282893	150404	59342	SCPEP1
ENSG00000156885	3.05022	2.07579e-22	49162.1	5866.73	149955	1339	COX6A2
ENSG00000069399	1.90658	1.0583e-12	77238	19798.8	147260	602	BCL3
ENSG00000136492	1.07842	7.45066e-08	136245	64487.7	146929	83990	BRIP1
ENSG00000120742	1.66275	2.65457e-12	87661.5	26988	145760	27230	SERP1
ENSG00000268350	1.64227	5.44139e-15	88325.2	27946.9	145054	29057	FAM156A
ENSG00000034152	1.19474	4.24524e-10	121354	52262	144987	5606	MAP2K3
ENSG00000179889	2.30168	2.65873e-16	62916	12279.5	144812	23042	PDXDC1
ENSG00000198513	5.44901	0.000220075	26564.7	600.951	144751	51062	ATL1
ENSG00000185905	-1.11627	1.36934e-07	129618	279639	144688	283897	C16orf54
ENSG00000203668	-1.41493	1.77775e-07	101911	265939	144197	1122	CHML
ENSG00000197024	2.20626	2.44567e-08	65167.4	13754.5	143776	57541	ZNF398
ENSG00000177791	2.16475	0.0021263	66375.5	14085.9	143687	58529	MYOZ1
ENSG00000243811	-1.06194	0.000288793	134287	279338	142605	140564	APOBEC3D
ENSG00000172771	3.0079	4.45825e-23	47402.1	5786.07	142581	90288	EFCAB12
ENSG00000163633	-2.61081	3.34003e-14	54591.6	330118	142528	132989	C4orf36
ENSG00000164398	5.96806	0.000373301	23868.7	379.049	142450	23305	ACSL6
ENSG00000123594	8.85083	0.000875681	15966.9	33.8049	141320	92552	ATXN3L
ENSG00000176200	2.23531	5.20694e-23	62922.8	13398.5	140652	219986	OR4D11
ENSG00000127399	-1.41027	2.52503e-06	99462.8	270433	140269	65999	LRRC61
ENSG00000047597	1.48466	3.68363e-05	94472.1	32523.4	140259	7504	XK
ENSG00000212993	1.95364	3.5778e-11	71471.3	18484.6	139629	5462	POU5F1B
ENSG00000130254	5.12241	0.000230196	27217.2	788.171	139418	9667	SAFB2
ENSG00000169271	-1.52733	7.632e-13	91156.3	270168	139226	8988	HSPB3
ENSG00000052850	1.69471	1.30372e-09	82013.8	24738.3	138989	60529	ALX4
ENSG00000175581	3.19496	9.13207e-05	43306.3	4669.9	138362	51642	MRPL48
ENSG00000249861	1.17009	1.76853e-09	118145	52115.2	138241	148003	LGALS16
ENSG00000187134	8.05054	7.8321e-09	17157.4	62.6341	138126	1645	AKR1C1
ENSG00000163590	1.19062	8.90718e-12	115844	49977.9	137926	151742	PPM1L
ENSG00000174891	-1.1151	2.6469e-06	123279	268975	137469	51319	RSRC1
ENSG00000051108	1.62052	3.00212e-19	84315	27244.7	136634	9709	HERPUD1
ENSG00000122574	2.83623	1.49085e-06	47671.6	6118.41	135208	644150	WIPF3
ENSG00000182899	1.49649	1.69664e-05	90347.9	30641.9	135205	6165	RPL35A
ENSG00000136045	1.10359	0.00119242	122433	56162.3	135115	11137	PWP1
ENSG00000131711	4.07546	5.15079e-06	33128.7	1766.29	135015	4131	MAP1B
ENSG00000198610	3.3596	8.73593e-25	40140.6	3895.93	134856	1109	AKR1C4
ENSG00000177359	1.8055	1.18236e-05	73991.3	21476.5	133591	144203	AC024940.1
ENSG00000167747	2.85984	4.72483e-09	46671.7	6174.98	133474	84798	C19orf48
ENSG00000196584	-1.08935	4.59569e-07	122333	257920	133264	7516	XRCC2
ENSG00000198816	2.56217	1.34816e-16	51808.7	8698.17	132743	140467	ZNF358
ENSG00000176406	2.75993	5.07826e-21	48089.1	7091.37	132723	9699	RIMS2
ENSG00000130558	1.11105	0.000473424	119342	53868.7	132594	10439	OLFM1
ENSG00000178462	2.32946	3.35111e-10	56835.3	11135	132396	79861	TUBAL3
ENSG00000169169	-1.03491	2.80713e-06	127171	256844	131611	126129	CPT1C
ENSG00000196182	1.23098	4.02599e-05	106549	45299.6	131160	83931	STK40
ENSG00000214782	1.07747	2.19827e-05	121634	57613.1	131057	728588	MS4A18
ENSG00000126010	2.57613	9.43394e-30	50734.4	8528.46	130698	2925	GRPR
ENSG00000197444	4.38935	0.000487457	29763.2	1344.02	130641	55753	OGDHL
ENSG00000266582	1.01267	0.00015714	128524	61908.1	130153	100616264	MIR4527
ENSG00000104679	3.47762	3.28008e-31	37223.7	3310.54	129450	203069	R3HCC1
ENSG00000077942	1.28601	1.10766e-06	100579	40281	129345	2192	FBLN1
ENSG00000079337	-1.64683	4.71009e-09	78191.7	250786	128768	10411	RAPGEF3
ENSG00000164871	2.40356	7.26758e-13	53416.8	9746.49	128391	10407	SPAG11B
ENSG00000227744	3.93972	2.55272e-07	32365.8	2084.95	127512	401039	LINC01940
ENSG00000091640	2.48093	2.00749e-16	51208.1	8920.54	127044	9552	SPAG7
ENSG00000266436	1.10927	4.77083e-08	114382	52380	126881	100422888	MIR4264
ENSG00000086991	1.74042	1.38882e-05	72697.3	20757.2	126524	50507	NOX4
ENSG00000231890	2.63278	6.74449e-17	47901.8	7675.59	126115	NA	DARS-AS1
ENSG00000175874	1.54075	9.09878e-06	81726.8	27869.7	125921	200407	CREG2
ENSG00000116039	1.81098	9.08406e-09	69084.7	19179.3	125111	525	ATP6V1B1
ENSG00000178974	-1.29035	9.58682e-07	96395	229697	124383	55030	FBXO34
ENSG00000162300	1.05007	3.59601e-11	118417	56665.5	124346	7542	ZFPL1
ENSG00000111877	6.4747	4.03096e-08	19088.8	227.195	123594	254394	MCM9
ENSG00000198863	2.33583	0.000945721	52744.7	10044	123203	146923	RUNDC1
ENSG00000176853	1.3069	0.000457591	93590.9	36757.9	122314	157769	FAM91A1
ENSG00000179331	1.02162	4.02651e-08	119326	58982.5	121906	54734	RAB39A
ENSG00000198108	7.30738	0.00043728	16679.5	104.537	121883	337876	CHSY3
ENSG00000058063	1.98026	0.00352336	61247.4	14869.6	121286	23200	ATP11B
ENSG00000266139	1.60298	3.93776e-18	75572.1	24665.8	121141	100616341	MIR4435-2
ENSG00000072071	1.22103	0.00313216	98982.5	41115.3	120860	22859	ADGRL1
ENSG00000167618	-1.16622	3.07957e-05	103456	233588	120652	3904	LAIR2
ENSG00000109667	1.41452	2.57668e-11	84907.9	31626.3	120104	56606	SLC2A9
ENSG00000162409	4.25815	5.00718e-14	28141.1	1417.9	119829	5563	PRKAA2
ENSG00000166913	4.90639	0.00106337	24343.6	883.585	119439	7529	YWHAB
ENSG00000188585	1.25618	4.12168e-12	94900.4	39431.9	119212	NA	CLEC20A
ENSG00000276622	1.41744	0.00271586	83719.2	31090.3	118667	102465246	MIR6499
ENSG00000058404	-2.30782	3.40273e-16	51363.2	250528	118537	816	CAMK2B
ENSG00000164466	1.76443	3.46732e-15	67067.8	19528.7	118336	94081	SFXN1
ENSG00000181991	-1.20457	2.77007e-05	98232.1	222919	118327	64963	MRPS11
ENSG00000143105	-2.27126	1.18992e-11	51624.8	248100	117253	3744	KCNA10
ENSG00000207562	1.33856	6.18222e-06	87142.9	34385.1	116646	407042	MIR34C
ENSG00000264712	4.57839	4.08141e-23	25470.4	1011	116613	100616261	MIR4504
ENSG00000010072	2.15726	1.69817e-09	54014.1	11940.9	116523	83932	SPRTN
ENSG00000215356	1.85177	4.96078e-08	62810.9	17495.5	116311	100132396	ZNF705B
ENSG00000092470	1.66031	2.86015e-09	69588.8	22643.1	115539	79968	WDR76
ENSG00000104331	1.18033	6.06122e-11	97884.5	43190.7	115536	54928	IMPAD1
ENSG00000167360	2.32462	8.06741e-24	49579.1	9766.54	115253	390061	OR51Q1
ENSG00000101146	1.7228	2.08219e-11	66705.5	19828.3	114920	8480	RAE1
ENSG00000185684	-1.30456	7.09733e-06	88029.9	213760	114841	NA	EP400NL
ENSG00000168246	3.01746	6.84453e-31	37955.4	4641.98	114529	92181	UBTD2
ENSG00000204671	1.14518	5.00222e-12	99977.6	44542.5	114492	386653	IL31
ENSG00000178385	-1.07223	1.90969e-05	106361	220146	114044	389072	PLEKHM3
ENSG00000180697	7.59598	7.81591e-11	14899	77.9512	113173	152065	C3orf22
ENSG00000226913	8.5573	0.000365152	13192.8	32.8049	112895	100132677	BSN-AS2
ENSG00000164411	2.51231	4.77071e-23	44729	7840.54	112373	375519	GJB7
ENSG00000186453	-1.21984	0.00335518	92084.7	214276	112329	653140	FAM228A
ENSG00000251694	2.46576	1.50252e-24	45347.7	8255.76	111817	391627	USP17L9P
ENSG00000177034	2.51961	7.89112e-34	44372.8	7695.41	111802	345778	MTX3
ENSG00000197562	1.84862	6.51748e-18	60353.7	16882.4	111571	57799	RAB40C
ENSG00000233901	1.69037	1.80514e-08	65852.3	20183	111315	100506119	LINC01503
ENSG00000232104	1.17989	1.15191e-09	94206	40137.4	111153	101929302	RFX3-AS1
ENSG00000222831	2.23174	2.1873e-08	49791.9	10436.2	111123	100302139	MIR1537
ENSG00000172757	2.91029	1.82202e-16	38164.3	4946.34	111069	1072	CFL1
ENSG00000116138	2.03459	2.09369e-17	54570	13195.2	111028	23341	DNAJC16
ENSG00000186765	4.0596	3.37469e-14	27290.4	1699.85	110788	25794	FSCN2
ENSG00000106299	5.38993	0.000120737	20392.9	476.561	109916	8976	WASL
ENSG00000137054	1.28946	3.21538e-05	84533.4	34544.2	109002	64425	POLR1E
ENSG00000242428	-1.38226	1.20787e-10	78801.1	209944	108924	101929238	C3orf67-AS1
ENSG00000186103	3.06789	9.06674e-06	35453.8	4054.27	108768	503582	ARGFX
ENSG00000025796	2.78674	4.64692e-19	38914.6	5520.98	108445	11231	SEC63
ENSG00000170325	3.56112	1.56387e-15	30377.8	2589.24	108179	56980	PRDM10
ENSG00000029153	-1.2588	2.70788e-05	85879	213706	108104	56938	ARNTL2
ENSG00000205029	-1.49908	6.67547e-05	72061.8	202804	108026	390144	OR5D16
ENSG00000120327	-3.04857	1.52774e-16	35401.6	297677	107924	56122	PCDHB14
ENSG00000146826	2.13978	2.01043e-16	50069.2	11428.2	107137	55262	C7orf43
ENSG00000235470	7.54941	0.00127769	14189.2	83.1951	107120	102724341	NEURL1-AS1
ENSG00000197241	2.15021	2.05061e-09	49323.4	10835.1	106055	155184	SLC2A7
ENSG00000142538	-1.36235	4.42691e-08	77801.2	205763	105993	113091	PTH2
ENSG00000225492	-1.49834	3.13718e-10	70739	203948	105991	400759	GBP1P1
ENSG00000061273	-1.13633	8.22184e-07	93223.9	207539	105933	51564	HDAC7
ENSG00000251128	2.65144	5.05421e-32	39891.1	6374.2	105769	101928734	WWC2-AS1
ENSG00000115266	2.88823	0.00029571	36466.2	4986.1	105323	10297	APC2
ENSG00000167384	1.00489	1.0279e-12	104701	51647.6	105213	7733	ZNF180
ENSG00000278870	3.48249	3.4384e-06	30191.2	2564.37	105141	79324	OR51G1
ENSG00000179915	2.71113	1.99958e-27	38633	5903.51	104739	9378	NRXN1
ENSG00000184293	1.10867	3.4886e-10	94325.2	43543.7	104576	160365	CLECL1
ENSG00000104763	1.01553	9.48487e-11	102660	50798	104255	427	ASAH1
ENSG00000109762	1.26633	1.23829e-05	81979.6	34250.7	103813	83891	SNX25
ENSG00000250174	-1.0939	0.001723	94675.3	195937	103566	100873940	MYLK-AS2
ENSG00000135929	-2.79394	1.11189e-06	36637.9	273116	102364	1593	CYP27A1
ENSG00000166407	2.41661	2.71938e-13	42232.5	7770.61	102060	4004	LMO1
ENSG00000223910	4.02466	1.50381e-17	25354.4	1518.12	102043	414201	ZNF32-AS3
ENSG00000157654	1.84547	1.43429e-26	55064	15432.4	101619	445815	PALM2-AKAP2
ENSG00000264800	1.45044	6.64133e-12	69966.2	25144.4	101481	100422895	MIR4294
ENSG00000199031	1.07979	8.95296e-06	93370.1	43715.3	100820	442916	MIR371A
ENSG00000166147	1.00288	0.00014175	100348	49919.3	100636	2200	FBN1
ENSG00000108556	2.04914	9.95159e-10	49053	11591.2	100517	1145	CHRNE
ENSG00000141582	-1.92667	0.00914487	52018.1	210837	100222	8535	CBX4
ENSG00000268996	-1.17957	2.27483e-07	84761.4	188430	99981.6	100289341	MAN1B1-AS1
ENSG00000258725	-1.06333	0.001226	94003.8	197671	99957	100507118	PRC1-AS1
ENSG00000176884	2.21234	2.09432e-20	45066.9	9628.9	99703.3	2902	GRIN1
ENSG00000207340	1.12841	1.30372e-09	88095.9	39770.8	99408.6	101954273	RNVU1-1
ENSG00000170426	-1.12102	2.62329e-05	88259.4	184625	98940.7	121214	SDR9C7
ENSG00000172824	1.00478	4.9727e-09	98058.4	48552.2	98527.3	283848	CES4A
ENSG00000099338	2.32123	1.29343e-13	42323.8	8177.78	98243.2	57828	CATSPERG
ENSG00000224982	4.64445	0.000171043	21136.2	808.78	98166.1	387890	TMEM233
ENSG00000074410	1.28973	1.75525e-11	76080.1	30792.5	98122.7	771	CA12
ENSG00000197376	-1.34713	2.08364e-05	72591.8	182339	97790.9	NA	AC089987.1
ENSG00000207926	-1.01816	2.24362e-07	95889	194351	97630.1	406925	MIR135A1
ENSG00000117472	1.01589	1.81873e-08	95131	46610.1	96643.1	10103	TSPAN1
ENSG00000171495	1.38516	0.000160844	69578.6	25655.3	96377.2	133558	MROH2B
ENSG00000172458	1.03753	4.35156e-10	92760	44437	96241.6	53342	IL17D
ENSG00000166188	1.79881	1.53758e-09	53338.4	14887.8	95945.9	57567	ZNF319
ENSG00000163746	1.6471	4.85942e-18	58072.9	18129.2	95652.1	57047	PLSCR2
ENSG00000168389	2.1285	2.30291e-10	44622.4	10035.8	94978.7	84879	MFSD2A
ENSG00000198910	5.4766	0.00249024	17338.8	370.22	94957.8	3897	L1CAM
ENSG00000144935	2.51345	0.000391924	37509.9	5926.51	94279.2	7220	TRPC1
ENSG00000197363	4.09629	0.000206868	23004.8	1386.12	94234.5	340385	ZNF517
ENSG00000143569	2.15172	1.19215e-10	43660.9	9849.44	93946.1	9898	UBAP2L
ENSG00000169402	3.16807	5.32208e-26	29577.3	3263.88	93703.1	728194	RSPH10B2
ENSG00000092098	-2.98872	1.26381e-32	31255.4	249177	93413.7	55072	RNF31
ENSG00000168028	1.01635	6.4568e-13	91361.3	44582.6	92854.9	3921	RPSA
ENSG00000244968	1.59656	6.94232e-13	58137.2	19032	92819.6	100506495	LIFR-AS1
ENSG00000213693	1.11086	1.11763e-06	83518.9	38332	92777.8	NA	SEC14L1P1
ENSG00000130706	1.43082	0.000218737	64823.5	23844.9	92751	11047	ADRM1
ENSG00000138892	1.67594	3.17117e-13	55311.3	17654.5	92698.6	NA	TTLL8
ENSG00000199712	-1.50723	4.70561e-08	61453.3	177741	92624.4	100033437	SNORD115-2
ENSG00000146070	2.65004	0.000789785	34823	5482.59	92282.3	7941	PLA2G7
ENSG00000183831	1.11102	5.73337e-05	82571.5	37626.6	91738.9	339416	ANKRD45
ENSG00000166896	2.4634	5.27552e-08	37038.3	6637.85	91240.1	91419	ATP23
ENSG00000132394	-1.29084	1.13285e-05	70386.2	176040	90857.4	60678	EEFSEC
ENSG00000136279	1.95999	3.289e-16	46325.7	11644.8	90797.7	28988	DBNL
ENSG00000238099	5.43076	2.68143e-07	16716.9	377.049	90785.3	645434	LINC01625
ENSG00000166317	2.09891	9.0134e-06	43173.1	9726.39	90616.5	79933	SYNPO2L
ENSG00000081138	-1.2539	3.32442e-08	72230.3	172655	90569.9	1005	CDH7
ENSG00000232268	1.3581	5.99025e-18	66615	25403.7	90469.8	390037	OR52I1
ENSG00000196248	1.52217	0.00153013	59384.3	21567.4	90393	219873	OR10S1
ENSG00000227213	2.86199	1.10977e-13	31415.2	4308.93	89910	100874231	SPATA13-AS1
ENSG00000134030	-1.61847	0.00657579	55482.3	178229	89796.5	9811	CTIF
ENSG00000175866	1.99454	1.24232e-15	45017.9	11254.2	89790.3	10458	BAIAP2
ENSG00000227507	-1.24	1.44563e-06	72353.1	169417	89718	4050	LTB
ENSG00000178199	-1.67918	7.31386e-12	53353.8	165644	89590.5	340152	ZC3H12D
ENSG00000154358	4.40465	1.52322e-13	20215.2	925.244	89040.8	84033	OBSCN
ENSG00000250451	1.05983	2.76392e-07	83306.9	39408.6	88291.5	100874363	HOXC-AS1
ENSG00000196632	1.93139	1.71432e-07	45526.7	11801.9	87929.8	65267	WNK3
ENSG00000105290	7.51011	3.59463e-06	11706.5	62.3415	87916.8	333	APLP1
ENSG00000178084	3.35936	7.04185e-35	26152.7	2533.66	87856.4	170572	HTR3C
ENSG00000037897	-1.02928	1.73534e-08	84613.6	172895	87091.1	4234	METTL1
ENSG00000169604	3.07029	3.92771e-06	28319.8	3222.12	86950.1	84168	ANTXR1
ENSG00000103241	-1.85124	2.0818e-11	46940.3	166493	86897.8	2294	FOXF1
ENSG00000237790	3.15869	5.28212e-11	27496	3042.29	86851.3	106144585	LINC01318
ENSG00000266852	2.2644	4.89739e-11	38320.2	7774.05	86772.5	100616323	MIR4482
ENSG00000184007	-4.06166	5.67207e-08	21318.7	360195	86589.2	8073	PTP4A2
ENSG00000160323	2.14605	0.000296782	40198.1	8686.59	86267.3	11093	ADAMTS13
ENSG00000185022	3.52354	0.00113426	24482.2	2059.27	86264	23764	MAFF
ENSG00000204149	3.87057	1.38273e-13	22242.2	1506.63	86089.9	414189	AGAP6
ENSG00000082516	2.79942	5.89544e-09	30686.5	4204.68	85904.1	25929	GEMIN5
ENSG00000205208	-1.57748	2.60866e-11	54046.6	161246	85257.4	201725	C4orf46
ENSG00000102393	2.08963	7.99943e-16	40736.9	9532.93	85125.2	2717	GLA
ENSG00000085831	2.39835	3.08798e-20	35374	6665.12	84839.3	22996	TTC39A
ENSG00000069956	1.34341	3.44876e-12	63056.7	24781.5	84711.3	5597	MAPK6
ENSG00000130222	4.6978	0.00153391	17967.3	701.634	84406.6	10912	GADD45G
ENSG00000188306	-1.27923	5.54047e-10	65485.6	156698	83771.1	344657	LRRIQ4
ENSG00000186081	3.16679	8.42288e-20	26299.7	2985.93	83285.6	3852	KRT5
ENSG00000132639	1.54279	3.8308e-09	53822.9	18466.5	83037.5	6616	SNAP25
ENSG00000231396	2.57259	4.52616e-05	32267.4	5356.41	83010.9	100287144	USP17L10
ENSG00000237298	2.6588	1.34119e-32	31163.2	4936.41	82856.5	100506866	TTN-AS1
ENSG00000051382	1.16223	3.92811e-12	71162.3	31636.4	82707.2	5291	PIK3CB
ENSG00000085185	1.15779	6.32428e-05	71347.8	31902.5	82605.5	63035	BCORL1
ENSG00000164751	1.72965	6.15402e-05	47728.9	14095.6	82554.3	5828	PEX2
ENSG00000186017	1.19047	1.9403e-05	69291.3	29462	82489.2	84924	ZNF566
ENSG00000091542	-1.20628	4.99367e-06	68086.2	154216	82131.3	54890	ALKBH5
ENSG00000173349	4.47625	1.47917e-05	18318.8	770.268	81999.7	84826	SFT2D3
ENSG00000255359	3.05372	9.52169e-17	26665.7	3328.41	81429.4	100500938	CCDC179
ENSG00000131236	1.14782	1.96715e-05	70566.2	30916	80997.4	10487	CAP1
ENSG00000087842	1.7423	4.42135e-05	46436.4	13520.1	80906	8544	PIR
ENSG00000211538	2.21696	4.17506e-16	36303.9	7866.83	80484.2	574503	MIR501
ENSG00000175826	1.42855	5.48493e-09	56322	21008.9	80458.5	23399	CTDNEP1
ENSG00000092201	1.04291	1.50866e-07	77132	37055.1	80441.9	11198	SUPT16H
ENSG00000189241	3.54328	9.35756e-13	22692.4	1875.49	80405.3	7259	TSPYL1
ENSG00000258597	3.27285	1.27735e-08	24458.3	2460.61	80048.5	390502	SERPINA2
ENSG00000196116	1.49868	1.86641e-07	53363.8	19323.2	79975.4	23424	TDRD7
ENSG00000160233	1.16382	8.98587e-07	68131.6	29750.1	79292.9	81543	LRRC3
ENSG00000172732	-1.39685	0.000633217	56632	148006	79106.3	80198	MUS81
ENSG00000103569	-1.21672	5.08761e-12	64913	150473	78981.1	366	AQP9
ENSG00000062485	1.59726	4.50957e-05	49400.3	15225.6	78905.3	1431	CS
ENSG00000175063	7.17249	0.000578487	11000.7	96.3902	78902.1	11065	UBE2C
ENSG00000171840	4.01688	4.50404e-05	19626.9	1106.07	78838.8	4815	NINJ2
ENSG00000182944	1.00336	8.83088e-05	78397.4	38776.2	78660.7	2130	EWSR1
ENSG00000108387	1.83162	2.75583e-21	42928.4	11855.2	78628.4	5414	SEPT4
ENSG00000108375	-1.71971	1.18366e-10	45715.5	145649	78617.2	54894	RNF43
ENSG00000188674	1.32122	1.25717e-09	59456	23484.2	78554.7	389073	C2orf80
ENSG00000240694	-2.68563	4.92841e-11	29223.8	180294	78484.5	10687	PNMA2
ENSG00000111490	1.69701	2.53382e-11	46239.5	14246	78468.6	23329	TBC1D30
ENSG00000250889	2.36739	7.26061e-10	33048.9	6543.66	78239.6	104326191	LINC01336
ENSG00000130202	-1.14952	4.75498e-08	67790.4	146975	77926.6	5819	NECTIN2
ENSG00000106125	5.93203	0.000159321	13084.1	224.561	77615.1	84182	MINDY4
ENSG00000141499	2.30839	7.919e-14	33494.1	6656.85	77317.5	55135	WRAP53
ENSG00000061936	2.14584	8.37254e-13	36014	8180.76	77280.1	6433	SFSWAP
ENSG00000184507	1.1161	0.000911533	69224.7	31690.8	77261.6	256646	NUTM1
ENSG00000110934	1.10591	0.000557498	69717.4	33098.6	77101.1	51411	BIN2
ENSG00000160055	4.84907	1.70772e-16	15804.7	521.439	76638.1	56063	TMEM234
ENSG00000133121	5.3549	0.00102425	14166	351.195	75857.8	90627	STARD13
ENSG00000164794	-1.81074	0.000277426	41343.5	145934	74862.5	27012	KCNV1
ENSG00000204482	-1.60502	6.79412e-06	46572.8	137119	74750.3	7940	LST1
ENSG00000258555	1.14663	3.13201e-08	65126.1	29532.1	74675.5	NA	SPECC1L-ADORA2A
ENSG00000146247	2.17999	8.69106e-27	33994.4	7506.63	74107.3	55023	PHIP
ENSG00000172818	3.29568	3.23808e-20	22430	2267.29	73922.1	5017	OVOL1
ENSG00000241767	1.84835	4.10428e-18	39865.6	11006.3	73685.6	104355289	LINC01324
ENSG00000101849	-1.35773	2.87671e-11	54037	138635	73367.7	6907	TBL1X
ENSG00000145506	1.74002	4.5202e-10	41783.8	12287.7	72704.7	85409	NKD2
ENSG00000184388	-2.00167	0.000719103	36280	146123	72620.8	645974	PABPC1L2B
ENSG00000048740	-1.99783	1.20408e-15	36234.4	144599	72390.3	10659	CELF2
ENSG00000096717	15.3212	5.21542e-10	4711.98	0	72193.1	23411	SIRT1
ENSG00000161980	1.03037	2.08012e-05	70034.3	33327.7	72161.1	51728	POLR3K
ENSG00000035115	1.04953	0.000337098	68703.6	32985.7	72106.8	26751	SH3YL1
ENSG00000136856	3.51486	7.74019e-18	20366.6	1725.98	71585.9	29988	SLC2A8
ENSG00000123505	1.0086	6.27573e-12	70925.3	34746.2	71535.1	262	AMD1
ENSG00000235098	1.02675	3.69799e-11	69344.7	33999.4	71199.5	441869	ANKRD65
ENSG00000160752	5.78848	1.66554e-06	12260.7	221.073	70970.9	2224	FDPS
ENSG00000166793	-1.08769	0.000150348	65198.8	144313	70916	219539	YPEL4
ENSG00000181218	1.08555	9.19157e-10	65088.1	30476.2	70656.1	92815	HIST3H2A
ENSG00000189043	-1.3772	6.4198e-10	51100.1	128715	70375.1	4697	NDUFA4
ENSG00000119457	10.17	6.4053e-06	6919.27	6.09756	70368.7	57864	SLC46A2
ENSG00000112237	1.9042	8.90718e-12	36735.1	9679.83	69950.8	892	CCNC
ENSG00000166930	2.04665	3.43653e-08	34147.6	8143.02	69888.3	64232	MS4A5
ENSG00000060138	-2.0221	2.61055e-08	34471.2	140649	69704.4	8531	YBX3
ENSG00000076984	-1.6326	4.66371e-09	42588.9	128982	69530.6	5609	MAP2K7
ENSG00000077800	-1.10317	1.07772e-07	62886.2	138701	69374	8468	FKBP6
ENSG00000188811	1.21438	2.34884e-05	57048.2	25120.1	69278	387921	NHLRC3
ENSG00000075089	1.52708	4.8603e-08	45335.2	15656.3	69230.5	64431	ACTR6
ENSG00000162889	2.94925	5.06189e-21	23396	3003.56	69000.6	9261	MAPKAPK2
ENSG00000177156	1.39007	7.29803e-07	49546.1	18397.3	68872.7	6888	TALDO1
ENSG00000269190	1.71325	1.73496e-06	40010.3	11864.1	68547.7	115290	FBXO17
ENSG00000140009	2.54673	0.000660202	26903.6	4521.73	68516.2	2100	ESR2
ENSG00000180773	1.65763	2.72355e-05	41245.7	12644.1	68370	120103	SLC36A4
ENSG00000198083	2.55114	5.51972e-17	26773.1	4396.61	68302	81870	KRTAP9-9
ENSG00000189280	1.69722	2.96914e-09	40238.2	12167.5	68293	2709	GJB5
ENSG00000261432	10.8319	5.95622e-07	6233.1	3.39024	67516.3	106146149	LINC01613
ENSG00000179954	-1.39009	0.00146501	48482	124783	67394.5	284297	SSC5D
ENSG00000197081	-1.32046	0.000178953	50809.5	130529	67091.9	3482	IGF2R
ENSG00000125347	2.08571	0.00598848	32107	7283.78	66966.1	3659	IRF1
ENSG00000253846	3.3513	1.49017e-18	19814.8	1933.46	66405.3	56106	PCDHGA10
ENSG00000250582	1.45709	1.85245e-11	45364.4	16228	66099.9	101927659	SMAD1-AS2
ENSG00000277586	-1.30868	0.000525118	50500.9	126927	66089.3	4747	NEFL
ENSG00000095066	1.28536	4.40931e-11	51373.3	21517.2	66033.2	29911	HOOK2
ENSG00000197153	5.3777	3.41488e-08	12262.4	311.366	65943.5	8356	HIST1H3J
ENSG00000184698	7.65097	0.00082594	8606.17	38.1707	65845.6	390059	OR51M1
ENSG00000100276	3.06146	1.35368e-11	21464	2609.73	65711	10633	RASL10A
ENSG00000103313	2.66279	2.29174e-23	24466	3758.27	65147.8	4210	MEFV
ENSG00000205155	-1.1181	0.00202408	58256.9	125375	65137	55851	PSENEN
ENSG00000134020	1.81152	0.000195689	35744.1	10129.5	64751.2	157310	PEBP4
ENSG00000243468	3.13326	6.96603e-20	20644	2350.05	64683.1	27160	INGX
ENSG00000205129	-1.04908	1.68093e-07	61601.9	130347	64625.1	441054	C4orf47
ENSG00000130649	1.1506	1.34646e-06	56141.8	25209.9	64596.9	1571	CYP2E1
ENSG00000189366	-1.06767	1.10644e-07	60390.8	123481	64477.3	200810	ALG1L
ENSG00000167825	1.20811	7.9511e-08	53304.3	23107.2	64397.4	10798	OR5I1
ENSG00000165169	-2.60439	3.66309e-11	24584.2	147847	64026.9	6990	DYNLT3
ENSG00000254081	1.99683	2.57047e-14	31771.1	7778.8	63441.6	286186	LINC01299
ENSG00000183155	-1.31165	2.15317e-08	48364.8	120769	63437.7	5877	RABIF
ENSG00000262209	-2.13795	1.79409e-06	29642.9	127818	63374.9	56102	PCDHGB3
ENSG00000204019	1.10168	5.54047e-10	57391.9	26395	63227.7	203413	CT83
ENSG00000102974	1.97444	4.6545e-06	32012.4	7937.71	63206.5	10664	CTCF
ENSG00000100401	1.14642	0.000430041	54855.8	22824.6	62887.5	5905	RANGAP1
ENSG00000199082	3.07682	0.000146915	20374.2	2558.8	62687.6	442909	MIR342
ENSG00000124496	1.69814	1.53119e-08	36665.1	11325.1	62262.3	55809	TRERF1
ENSG00000159720	2.10124	3.57918e-21	29551.9	6852.54	62095.4	9114	ATP6V0D1
ENSG00000236991	1.23217	4.70362e-08	50356.3	21449	62047.7	NA	EDRF1-AS1
ENSG00000214706	1.08808	3.80774e-10	56983.6	26393.2	62002.9	7866	IFRD2
ENSG00000068976	1.15339	0.000501049	53679.4	23533.3	61913.2	5837	PYGM
ENSG00000123643	2.18812	4.2641e-05	28014.2	5978.68	61298.3	206358	SLC36A1
ENSG00000254562	-1.06828	1.27998e-12	57343.4	120455	61258.6	101928536	LINC01493
ENSG00000183751	9.38202	3.21329e-06	6513.05	9.46341	61105.6	10607	TBL3
ENSG00000264010	1.09617	2.01927e-06	55616	25508.4	60964.7	100616469	MIR4429
ENSG00000197085	-1.54466	5.76898e-06	39251.4	112448	60630.1	404744	NPSR1-AS1
ENSG00000143742	3.12487	1.85705e-31	19360	2179.95	60497.4	6726	SRP9
ENSG00000234390	4.71562	6.52484e-06	12824.6	461.805	60475.8	158572	USP27X-AS1
ENSG00000177854	-1.42922	8.24487e-12	42249.8	112082	60384.5	8269	TMEM187
ENSG00000174080	1.92096	3.1656e-10	31412	8170.51	60341.1	8722	CTSF
ENSG00000077274	1.45151	1.49514e-10	41221.1	14654.5	59832.9	827	CAPN6
ENSG00000164576	1.15343	0.000128238	51774.3	22823.2	59718.1	79685	SAP30L
ENSG00000175793	-1.97508	5.79124e-08	29976.6	123758	59206.1	2810	SFN
ENSG00000204882	3.2114	7.45518e-07	18433	2010.41	59195.8	2843	GPR20
ENSG00000173166	3.25488	2.39473e-36	18155.1	1863.76	59092.7	65059	RAPH1
ENSG00000213930	3.21919	4.35609e-07	18228.4	1888.56	58680.8	2592	GALT
ENSG00000261796	1.25066	1.73132e-10	46794.3	19637	58523.6	100534599	ISY1-RAB43
ENSG00000047249	6.37201	8.08131e-05	9136.12	111.463	58215.4	51606	ATP6V1H
ENSG00000100031	5.68829	5.10317e-08	10223.4	202.293	58153.5	2678	GGT1
ENSG00000226287	1.16516	0.00148164	49724.4	22870.2	57936.7	84222	TMEM191A
ENSG00000207586	1.1462	1.15551e-14	50300.5	22643.2	57654.6	406926	MIR135A2
ENSG00000170801	3.58081	2.94368e-17	16099.1	1333.95	57647.9	94031	HTRA3
ENSG00000187954	3.54874	5.42335e-11	16232.7	1402.17	57605.4	50626	CYHR1
ENSG00000178358	1.07254	6.79944e-14	53687.6	25291.2	57582	120775	OR2D3
ENSG00000186471	1.83128	1.76165e-18	31227.3	8720.68	57185.9	158798	AKAP14
ENSG00000263963	1.4257	7.58118e-05	40090.9	14660	57157.5	100616209	MIR4461
ENSG00000184363	1.64718	2.89776e-07	34664.3	10980.8	57098.4	11187	PKP3
ENSG00000198355	3.85432	6.81248e-10	14797.7	999.463	57035	415116	PIM3
ENSG00000136040	-1.04776	5.74511e-08	54423.7	111214	57023	10154	PLXNC1
ENSG00000213523	3.68175	1.16967e-14	15442.1	1213.05	56854	10011	SRA1
ENSG00000174498	4.97699	3.51095e-06	11347.3	349.244	56475.4	9543	IGDCC3
ENSG00000233198	1.51909	3.09613e-10	37130.4	12824.7	56404.6	643596	RNF224
ENSG00000181690	1.02493	4.02737e-07	54944.6	26757.9	56314.6	5324	PLAG1
ENSG00000116251	3.21439	7.58678e-26	17511.7	1856.1	56289.4	6146	RPL22
ENSG00000243701	1.65276	7.64841e-12	34015.2	10637.7	56218.9	344595	DUBR
ENSG00000126261	1.22447	0.00311614	45901.9	18300.6	56205.3	10054	UBA2
ENSG00000175745	2.5522	7.57042e-20	21996.9	3741.88	56140.6	7025	NR2F1
ENSG00000162994	1.2361	5.94642e-16	45396.3	18981.9	56114.6	130162	CLHC1
ENSG00000164418	1.89743	3.11441e-21	29533.5	7957.66	56037.8	2898	GRIK2
ENSG00000179262	2.2279	1.7936e-07	25147.6	5188.2	56026.4	5886	RAD23A
ENSG00000076662	2.56275	3.21845e-05	21849.4	3570.66	55994.7	3385	ICAM3
ENSG00000129474	1.39389	1.66933e-10	39945.2	15032.9	55679.2	84962	AJUBA
ENSG00000241388	1.02142	1.07772e-07	54329	26671.4	55492.8	283460	HNF1A-AS1
ENSG00000019186	1.42786	5.50891e-06	38781.4	13757.9	55374.2	1591	CYP24A1
ENSG00000179695	-2.28622	8.7238e-16	24215	118248	55360.7	341416	OR6C2
ENSG00000176723	1.51741	3.33707e-10	36423.9	12444.8	55269.8	283933	ZNF843
ENSG00000163206	3.03862	4.58402e-11	18115.2	2078.83	55045.1	4184	SMCP
ENSG00000265031	2.03374	1.25519e-13	26992.4	6410.88	54895.6	100526648	MIR1273E
ENSG00000170689	1.01674	1.31682e-10	53740.4	26449.9	54639.8	3219	HOXB9
ENSG00000176009	-1.65264	3.38596e-13	33048.7	100721	54617.6	56676	ASCL3
ENSG00000176746	1.01502	9.51958e-11	53737.3	26321.5	54544.3	158809	MAGEB6
ENSG00000241316	3.08288	1.32676e-08	17683.4	2118.51	54515.8	101927111	SUCLG2-AS1
ENSG00000263641	3.63503	2.42562e-07	14961.4	1250.93	54385.2	100616317	MIR4777
ENSG00000104549	-1.15601	0.000931148	47003.1	105483	54336.3	6713	SQLE
ENSG00000115687	-1.64376	3.0003e-15	32848.1	103303	53994.6	23178	PASK
ENSG00000207941	2.09322	4.32829e-07	25775.7	6533.2	53954.3	693137	MIR552
ENSG00000132581	4.5014	1.29346e-09	11952	539.049	53800.9	6388	SDF2
ENSG00000198324	6.62239	1.65479e-08	8105.17	87.8293	53675.6	144717	FAM109A
ENSG00000109956	-1.17533	1.44657e-05	45588.3	101907	53581.6	27087	B3GAT1
ENSG00000166090	2.24759	0.000698337	23777.8	4805.15	53442.6	64806	IL25
ENSG00000198719	-3.72342	4.81442e-18	14249.2	212809	53055.7	28514	DLL1
ENSG00000165271	8.04045	0.00551577	6595.27	21.9512	53028.9	65083	NOL6
ENSG00000207067	2.15331	5.616e-11	24622.9	5402.24	53020.6	26775	SNORA72
ENSG00000265203	2.87973	1.11684e-22	18409	2497.51	53012.9	5949	RBP3
ENSG00000134533	3.56781	1.72786e-15	14817.6	1245.73	52866.3	85004	RERG
ENSG00000144331	1.10827	8.76547e-07	47624.3	21907.5	52780.5	151126	ZNF385B
ENSG00000215305	-1.99552	1.30391e-07	26369.7	104779	52621.1	64601	VPS16
ENSG00000167107	1.48124	0.00112336	35330.8	12916.7	52333.2	80221	ACSF2
ENSG00000011332	-1.6999	6.23031e-15	30762.8	99270.4	52293.7	8193	DPF1
ENSG00000238923	9.10347	0.000539162	5728	10.5366	52144.7	100147744	RNU7-1
ENSG00000124782	1.98964	2.91503e-24	26192.2	6578.07	52113.1	6239	RREB1
ENSG00000069188	1.61036	4.62884e-25	32272.5	10424.4	51970.3	54549	SDK2
ENSG00000164900	1.13922	4.54672e-05	45469.6	20238.4	51799.9	2636	GBX1
ENSG00000223701	1.00069	0.000450799	51535.4	25255.4	51571	100652739	RAET1E-AS1
ENSG00000182326	4.07636	1.45277e-11	12624.6	740.439	51462.3	716	C1S
ENSG00000114956	-1.13971	2.01945e-06	44769.3	96521.4	51024.1	1716	DGUOK
ENSG00000265776	1.38822	0.00239168	36730.1	13853.1	50989.6	103504726	MIR3670-3
ENSG00000117118	-1.95442	8.24565e-12	26069.5	98009.4	50950.6	6390	SDHB
ENSG00000170876	1.12464	7.58435e-05	45299.8	20405.1	50945.7	79188	TMEM43
ENSG00000173976	-1.79912	1.34246e-17	28252.5	96467.2	50829.6	84839	RAX2
ENSG00000114993	1.74296	1.40836e-15	29142.1	8478.24	50793.6	6242	RTKN
ENSG00000188770	5.67351	0.00031332	8934.2	167.951	50688.2	26254	OPTC
ENSG00000125845	1.31546	0.000210089	38501.4	15187	50647.1	650	BMP2
ENSG00000132000	1.00121	1.41708e-07	50358.1	25145.4	50419.2	79883	PODNL1
ENSG00000204713	2.60525	4.40697e-22	19280.8	3070.49	50231.3	5987	TRIM27
ENSG00000138085	1.39362	0.000154935	35977.5	13232.4	50139	51374	ATRAID
ENSG00000184164	2.55666	2.30291e-10	19606.7	3294.22	50127.6	79174	CRELD2
ENSG00000007001	1.26745	2.89244e-06	39481.8	16230.9	50041.3	151531	UPP2
ENSG00000085552	1.66662	1.39478e-09	30004.2	9467.37	50005.6	57549	IGSF9
ENSG00000159212	2.87266	0.000505092	17405.9	2345.24	50001.3	54102	CLIC6
ENSG00000114405	2.65936	1.8847e-10	18800.4	2871.05	49997	57415	C3orf14
ENSG00000179057	1.83528	3.90604e-14	27227.1	7523.83	49969.4	283284	IGSF22
ENSG00000138079	2.3798	3.65572e-07	20989.7	3879.61	49951.3	6519	SLC3A1
ENSG00000084674	6.14728	0.000911533	8085.66	104.39	49704.8	338	APOB
ENSG00000188322	5.49806	4.22042e-06	9030.66	183.268	49651.1	388228	SBK1
ENSG00000161955	1.56194	4.11086e-13	31701.8	10687.8	49516.4	8741	TNFSF13
ENSG00000108443	2.147	1.87793e-10	22949.3	5055.05	49272.3	6198	RPS6KB1
ENSG00000225546	1.42547	6.27573e-12	34522.5	12887.6	49210.9	105375475	LINC02476
ENSG00000141431	1.89051	6.81322e-05	26024.1	6719.98	49198.9	80816	ASXL3
ENSG00000182885	1.25914	3.94067e-06	38965.8	16042.1	49063.4	222487	ADGRG3
ENSG00000237671	1.55245	6.50618e-16	31329.9	10581.5	48638.2	729422	GAGE12C
ENSG00000160208	1.16923	2.62765e-05	41531.4	18082.7	48559.8	23076	RRP1B
ENSG00000168040	1.54879	2.23774e-12	31297.5	10453.4	48473.3	8772	FADD
ENSG00000164185	-1.09106	3.92345e-08	44338.3	94392.5	48375.7	133923	ZNF474
ENSG00000081923	1.19536	0.00259429	40413.7	17403.8	48308.9	5205	ATP8B1
ENSG00000106538	1.78402	1.22271e-14	26987.6	7771.44	48146.5	5919	RARRES2
ENSG00000068784	6.52473	3.64259e-05	7375.76	70.4878	48124.8	55133	SRBD1
ENSG00000182158	1.81446	2.24197e-07	26299.3	7415.44	47719.1	64764	CREB3L2
ENSG00000180329	1.01075	1.53051e-06	47209.2	23014.1	47716.6	124808	CCDC43
ENSG00000124721	1.16646	5.61277e-07	40718.2	18105.1	47496	1769	DNAH8
ENSG00000240771	1.23351	2.93258e-06	38374.7	16051.4	47335.7	115557	ARHGEF25
ENSG00000180535	2.14443	1.03134e-22	22031.9	4983.83	47245.9	168620	BHLHA15
ENSG00000108773	-1.13427	7.40599e-08	41563.2	88893.2	47143.8	2648	KAT2A
ENSG00000233041	2.47406	3.25616e-26	19038.3	3398.12	47102.1	644844	PHGR1
ENSG00000236289	4.68957	2.6514e-05	10027.8	378.293	47025.9	NA	GACAT3
ENSG00000146859	1.75331	2.29546e-10	26778.1	7714.41	46950.2	55281	TMEM140
ENSG00000055208	-1.14	0.000755919	41106.2	93358.2	46861	23118	TAB2
ENSG00000212719	-2.03007	3.84368e-07	22828.3	91659	46343.1	339263	C17orf51
ENSG00000174628	1.38592	0.00880608	33324.7	12339.1	46185.5	124152	IQCK
ENSG00000206075	1.40548	0.000739674	32735.8	12515.7	46009.6	5268	SERPINB5
ENSG00000233930	6.67385	3.36882e-10	6877.59	73.1951	45900	338651	KRTAP5-AS1
ENSG00000065978	6.29066	4.4088e-05	7276.61	94.6829	45774.7	4904	YBX1
ENSG00000104879	5.95655	1.60136e-06	7662.76	116.195	45643.6	1158	CKM
ENSG00000156269	-1.1947	4.50997e-06	38125	89470.5	45548	84779	NAA11
ENSG00000179388	6.70976	4.32314e-05	6783.61	64.1707	45516.4	1960	EGR3
ENSG00000171872	2.28111	1.80587e-27	19935.6	4074.2	45475.2	128209	KLF17
ENSG00000173389	-2.68373	5.51586e-14	16847	111139	45212.9	132141	IQCF1
ENSG00000171302	-3.48472	3.02106e-16	12965.3	152735	45180.5	124583	CANT1
ENSG00000104921	2.60454	1.67055e-07	17340.2	2836.56	45163.3	2208	FCER2
ENSG00000164031	2.6056	2.39473e-36	17289.5	2827.88	45049.5	79982	DNAJB14
ENSG00000144559	1.60549	6.63389e-05	27921.2	9284.02	44827.1	132001	TAMM41
ENSG00000042980	-1.06857	0.000175653	41931.9	85486.3	44807.1	10863	ADAM28
ENSG00000252153	1.18211	1.52091e-09	37870	16675	44766.4	100313780	MIR2278
ENSG00000179913	2.42442	1.30025e-07	18456	3405.8	44745.1	10331	B3GNT3
ENSG00000023228	3.3247	7.75249e-31	13456.3	1353.78	44738	4719	NDUFS1
ENSG00000138160	2.83978	3.30062e-32	15727.5	2176.85	44662.6	3832	KIF11
ENSG00000184478	3.63596	1.02835e-22	12219.4	978.39	44429.3	390083	OR56A3
ENSG00000114391	2.27026	8.43041e-13	19553.6	3924.93	44391.9	6152	RPL24
ENSG00000121634	1.39272	1.81646e-13	31666	11952.2	44101.8	2703	GJA8
ENSG00000182315	1.10577	2.17582e-11	39836.4	18222.8	44050	653657	MBD3L3
ENSG00000186628	2.51356	4.17506e-16	17519.9	2988.98	44037.4	123722	FSD2
ENSG00000145414	2.85112	8.2923e-14	15394.6	2024.44	43891.7	92345	NAF1
ENSG00000115504	2.37089	4.02773e-16	18511.8	3648.95	43889.4	23301	EHBP1
ENSG00000188803	4.29455	0.00923771	10171.5	514.756	43682.2	388336	SHISA6
ENSG00000269364	-1.03675	9.41277e-10	41890.5	85529.5	43430	100128139	LINC01233
ENSG00000260477	7.34011	0.00215306	5908.9	34.878	43372	101929701	LINC01584
ENSG00000211584	1.30465	5.22925e-07	33161.1	13220.7	43263.7	55652	SLC48A1
ENSG00000113583	3.62969	2.27983e-05	11912.4	957.049	43238.2	56951	C5orf15
ENSG00000129538	1.33214	0.00771049	32249.9	12447	42961.5	6035	RNASE1
ENSG00000120137	-1.09324	1.92271e-05	39147.1	81361.1	42797.3	79646	PANK3
ENSG00000234224	1.34258	3.06776e-05	31873.1	12446	42792.3	730130	TMEM229A
ENSG00000170627	4.82507	0.0013698	8843.63	381.78	42671.1	121355	GTSF1
ENSG00000265635	3.5266	0.000101727	12043.5	1029.88	42472.5	100500817	MIR3612
ENSG00000206609	3.62376	0.00381097	11716.9	1033.24	42459.3	100033423	SNORD116-11
ENSG00000214717	-1.41987	1.54346e-06	29865.9	82316.1	42405.8	9189	ZBED1
ENSG00000168612	-2.00435	3.71335e-08	21074.4	87968.5	42240.5	90204	ZSWIM1
ENSG00000186166	2.30256	0.00225525	18307.8	3605.41	42154.9	338657	CCDC84
ENSG00000174791	1.84953	4.6979e-16	22703.1	6200.27	41990.1	9610	RIN1
ENSG00000207513	2.81686	9.46385e-07	14891.3	2106	41946.7	26869	RNU1-3
ENSG00000117868	1.50992	3.54537e-08	27720.2	9628.9	41855.3	57488	ESYT2
ENSG00000204300	1.07345	1.72239e-05	38869.2	18092.8	41724.2	338661	TMEM225
ENSG00000100372	-1.0004	0.000508985	41681.2	80873.6	41697.9	10478	SLC25A17
ENSG00000180089	1.23582	2.53722e-09	33740.4	14180.4	41697.2	255043	TMEM86B
ENSG00000018510	-1.36141	1.73406e-05	30615.1	78355.2	41679.6	8540	AGPS
ENSG00000135870	1.20761	2.39982e-09	34435	14652.8	41583.8	149041	RC3H1
ENSG00000267659	2.30351	9.64783e-21	17993.5	3650.12	41448.2	101928104	LINC01482
ENSG00000204531	1.57367	2.83459e-16	26273.2	8776	41345.2	5460	POU5F1
ENSG00000170473	2.17669	2.14258e-08	18949.5	4182	41247.1	84305	PYM1
ENSG00000143590	1.04834	7.985e-09	39102.5	18570.2	40992.6	1944	EFNA3
ENSG00000183098	1.31254	0.00798403	31090.2	12265.6	40807.2	10082	GPC6
ENSG00000179542	5.24426	1.97536e-05	7750.41	202.098	40645.2	139065	SLITRK4
ENSG00000116194	1.48847	0.000177228	27197.7	9634.07	40482.9	9068	ANGPTL1
ENSG00000168679	1.20925	3.89299e-05	33466.7	14417	40469.7	9122	SLC16A4
ENSG00000232423	-1.98544	0.00188683	20381.9	79215.1	40467	440561	PRAMEF6
ENSG00000207263	3.97687	2.97507e-08	10154.8	620.366	40384.1	100033428	SNORD116-16
ENSG00000099937	2.35656	4.08926e-29	17073.2	3340.15	40233.9	3053	SERPIND1
ENSG00000188379	3.86009	7.06902e-19	10416	719.659	40206.6	3440	IFNA2
ENSG00000091879	2.08581	3.56058e-17	19236	4568.49	40122.5	285	ANGPT2
ENSG00000172116	1.20668	5.1123e-05	33225.8	13942.4	40093	926	CD8B
ENSG00000251370	2.07084	0.0059129	19356.7	4308.63	40084.7	101929338	SEMA5A-AS1
ENSG00000163959	1.46087	0.00447865	27405.9	9679.66	40036.4	200931	SLC51A
ENSG00000141298	1.83961	7.27297e-08	21696.6	5976.63	39913.4	85464	SSH2
ENSG00000078177	2.32384	3.87141e-11	17162.7	3343.95	39883.4	55728	N4BP2
ENSG00000132466	1.19007	3.07948e-11	33248.1	14619.1	39567.5	26057	ANKRD17
ENSG00000258867	1.01416	2.78578e-11	38999.7	19183.1	39551.9	283587	LINC01146
ENSG00000082014	1.12699	0.000531474	34995.8	16026.4	39439.8	6604	SMARCD3
ENSG00000265944	1.63291	0.00163419	24150.4	7536.1	39435.3	100130480	LINC01387
ENSG00000156414	1.03332	6.73246e-07	38145.5	18596.3	39416.3	122402	TDRD9
ENSG00000266228	-2.44971	2.68012e-05	16052.9	88638	39324.8	100500890	MIR3611
ENSG00000171604	1.20722	2.92426e-11	32522.3	13876.8	39261.6	51523	CXXC5
ENSG00000163703	-1.77052	1.22815e-13	22130.3	73133.6	39182.3	78987	CRELD1
ENSG00000197056	1.57131	0.000940342	24924.4	8215.29	39164.1	79830	ZMYM1
ENSG00000156920	1.4073	3.07671e-10	27812.9	10453.9	39141	139378	ADGRG4
ENSG00000171385	1.25355	5.12671e-11	31126.8	13051.8	39019.1	3752	KCND3
ENSG00000186105	-1.10918	0.00268751	35066.1	74616.5	38894.7	100130733	LRRC70
ENSG00000138002	3.41142	4.35912e-06	11393.3	1006.37	38867.3	26160	IFT172
ENSG00000182004	1.83888	7.65024e-09	21120.3	5808.73	38837.6	6635	SNRPE
ENSG00000203729	5.49663	1.54479e-08	7058.02	153.098	38795.4	388719	LINC00272
ENSG00000146386	2.0676	4.43092e-07	18661.5	4405.22	38584.5	58527	ABRACL
ENSG00000104140	1.25942	5.12791e-08	30593.4	12755.6	38529.9	171177	RHOV
ENSG00000001460	-1.29824	1.7058e-10	29644.1	71074.3	38485.2	90529	STPG1
ENSG00000227676	1.91057	4.10277e-06	20099.3	5111.29	38401.3	103724388	LINC01068
ENSG00000112562	3.50746	1.72474e-10	10907.4	947.122	38257.2	64094	SMOC2
ENSG00000094755	3.98517	7.65758e-06	9582.76	600.707	38188.9	2568	GABRP
ENSG00000130332	1.72972	0.00127075	22052.6	6237.46	38144.9	51690	LSM7
ENSG00000162714	2.50083	5.71e-07	15208.1	2710.29	38033	84838	ZNF496
ENSG00000116260	3.18772	2.48951e-36	11882.3	1294.63	37877.6	5768	QSOX1
ENSG00000065135	1.66517	1.07682e-09	22614.4	7514.34	37656.9	2773	GNAI3
ENSG00000111799	1.38796	0.0039492	27129.2	10758.7	37654.3	1303	COL12A1
ENSG00000085465	6.38305	0.00721085	5890.63	71.5122	37600.2	5016	OVGP1
ENSG00000231637	-1.58154	4.24405e-05	23754.8	74580.7	37569.2	728405	USP17L29
ENSG00000213079	1.34476	3.82533e-13	27774.4	10722.8	37349.9	22828	SCAF8
ENSG00000189108	-1.30784	4.32457e-09	28548.1	69186	37336.3	26280	IL1RAPL2
ENSG00000006016	1.28144	4.72483e-09	29043.9	11982.4	37218.2	9244	CRLF1
ENSG00000164123	2.39578	6.96176e-14	15533.9	2959.24	37215.8	152940	C4orf45
ENSG00000129691	1.04313	8.68899e-05	35547.8	17310.5	37081	9070	ASH2L
ENSG00000165650	1.06155	8.65387e-11	34790.7	16484.5	36932.2	118987	PDZD8
ENSG00000100083	-1.55442	4.21072e-12	23690.6	69352.2	36825.2	26088	GGA1
ENSG00000013523	2.10297	4.7546e-08	17477.9	4172.8	36755.4	23357	ANGEL1
ENSG00000166595	-2.11938	1.16117e-05	17294.8	73252.9	36654.1	51647	FAM96B
ENSG00000208004	2.15533	4.237e-13	16962.4	3735.8	36559.6	574410	MIR323B
ENSG00000095917	3.57466	2.75088e-09	10190.7	814.39	36428.2	23430	TPSD1
ENSG00000160179	1.20524	5.64557e-09	30197.8	13056	36395.7	9619	ABCG1
ENSG00000124196	1.32145	8.00161e-07	27539	11069.7	36391.3	149699	GTSF1L
ENSG00000188373	2.51056	0.000339195	14494	2460.41	36388.2	387695	C10orf99
ENSG00000171206	6.09304	0.000220075	5932.98	80.0488	36149.8	81603	TRIM8
ENSG00000268606	1.6282	6.38044e-12	22109.9	7247.41	35999.3	4101	MAGEA2
ENSG00000171863	4.93803	0.000985441	7271	233.146	35904.4	6201	RPS7
ENSG00000136883	1.97338	0.00661951	18179.6	4587.15	35875.3	113220	KIF12
ENSG00000132854	2.54494	0.000846083	14096	2396.02	35873.6	163782	KANK4
ENSG00000254130	1.36637	0.000746605	26219.4	9562.15	35825.5	102557615	LINC01947
ENSG00000176635	1.09553	0.00023392	32694.4	15377.9	35817.8	150280	HORMAD2
ENSG00000161381	-1.06711	2.10057e-08	33547.2	68747.8	35798.4	57125	PLXDC1
ENSG00000234684	-1.14036	0.00021402	31348.6	68380.4	35748.5	100507495	SDCBP2-AS1
ENSG00000158669	1.14544	0.00142546	31184.7	14123.2	35720.2	137964	GPAT4
ENSG00000175121	-1.7579	1.34246e-17	20158.5	67369	35436.6	149708	WFDC5
ENSG00000176531	-1.11391	2.39306e-06	31714.6	68503	35327.1	653583	PHLDB3
ENSG00000099377	1.92044	3.66727e-27	18353.8	4781.83	35247.3	80270	HSD3B7
ENSG00000214279	1.5348	3.11101e-16	22964.8	7934.56	35246.5	NA	SCART1
ENSG00000182585	2.11481	0.000161067	16656.5	3731.71	35225.3	255324	EPGN
ENSG00000213967	2.31701	1.98061e-10	15190.6	3079.85	35196.8	730087	ZNF726
ENSG00000146047	1.55472	0.00100724	22556.2	7226.93	35068.5	255626	HIST1H2BA
ENSG00000006740	7.5208	4.74575e-06	4659.76	24.2927	35045.1	9912	ARHGAP44
ENSG00000171295	5.4489	1.90901e-06	6424.22	143.707	35004.9	126070	ZNF440
ENSG00000079263	2.73808	8.70835e-14	12713.5	1908.2	34810.6	11262	SP140
ENSG00000104218	-1.4743	3.08891e-06	23360	64132.7	34439.7	79848	CSPP1
ENSG00000165606	1.7213	4.17353e-05	19979.6	5963.39	34390.8	644168	DRGX
ENSG00000109046	1.47418	5.67888e-15	23298.6	8514	34346.4	26118	WSB1
ENSG00000123576	1.66954	4.02622e-13	20565.3	6491.73	34334.7	80712	ESX1
ENSG00000182732	5.02164	3.08891e-06	6818.93	200.976	34242.2	9628	RGS6
ENSG00000134531	1.78047	9.60519e-07	19182.5	5473.8	34153.9	2012	EMP1
ENSG00000215113	3.01624	3.97398e-09	11288.5	1331.51	34048.8	100132994	CXorf49B
ENSG00000125498	1.89884	2.58217e-09	17889.9	4690.93	33970	3802	KIR2DL1
ENSG00000259666	1.33673	0.00177138	25399.1	9736.41	33951.9	253044	LINGO1-AS1
ENSG00000263858	2.58234	4.5702e-17	13142.3	2282.49	33937.8	100616147	MIR4769
ENSG00000173612	2.12247	0.00018737	15894.5	3514.29	33735.5	222545	GPRC6A
ENSG00000174010	2.54467	1.72567e-10	13251.8	2267.61	33721.4	80311	KLHL15
ENSG00000201321	2.79963	0.00812509	12021.7	1706.88	33656.3	100169760	RNA5S9
ENSG00000146147	1.89166	2.6175e-08	17650.6	4636.56	33389	90523	MLIP
ENSG00000100647	1.40224	2.10366e-05	23724.5	9047.34	33267.5	9766	SUSD6
ENSG00000019505	2.8048	4.25536e-20	11835.2	1675.78	33195.3	57586	SYT13
ENSG00000263409	2.17228	0.000137413	15266.7	3339.8	33163.6	100616337	MIR4747
ENSG00000010438	1.56663	2.26679e-17	21065.1	7027.68	33001.2	5646	PRSS3
ENSG00000219438	2.06528	7.02915e-17	15954.9	3756.27	32951.4	25817	FAM19A5
ENSG00000177483	-1.10075	2.69385e-07	29866.7	63154.6	32875.7	375316	RBM44
ENSG00000107447	1.34228	5.63345e-11	24483.1	9467.63	32863.2	1791	DNTT
ENSG00000111275	-1.1451	3.09795e-08	28602.4	63364.4	32752.7	217	ALDH2
ENSG00000184076	2.56043	6.99728e-09	12781.4	2171.54	32725.8	29796	UQCR10
ENSG00000266509	6.28958	8.85321e-07	5202.49	68.4634	32721.4	100500873	MIR3934
ENSG00000207754	3.66097	1.58503e-06	8936	732.146	32714.4	664616	MIR487B
ENSG00000159733	2.96753	5.70906e-23	10987.6	1409.85	32605.9	57732	ZFYVE28
ENSG00000209645	1.60334	2.93436e-05	20331.9	6576.15	32599	692229	SNORD105
ENSG00000280263	1.63132	1.65003e-14	19930	6360.88	32512.1	440888	ACTR3BP2
ENSG00000256980	2.68315	1.623e-15	12107.8	1893.73	32487.1	100129128	KHDC1L
ENSG00000169684	2.16702	1.92755e-27	14964.2	3274.78	32427.8	1138	CHRNA5
ENSG00000155827	1.25982	1.99633e-09	25623.1	10819.5	32280.4	56254	RNF20
ENSG00000156475	2.03513	2.03117e-09	15858.9	3800.8	32275	5521	PPP2R2B
ENSG00000216069	1.7687	5.74128e-15	18227.4	5227.51	32238.8	100126309	MIR875
ENSG00000143437	3.97054	4.15395e-11	8059.93	563.439	32002.3	405	ARNT
ENSG00000139714	2.97191	3.88941e-12	10764.3	1366.85	31990.6	283385	MORN3
ENSG00000142634	-1.38678	1.77162e-07	23011.2	59537.8	31911.3	79180	EFHD2
ENSG00000123700	1.8467	2.77266e-12	17261.6	4764.73	31876.9	3759	KCNJ2
ENSG00000004455	-2.12579	0.000124832	14983.6	66706.9	31852.1	204	AK2
ENSG00000113163	6.38319	0.00277446	4954.95	57.4634	31628.4	10087	COL4A3BP
ENSG00000213625	1.3548	0.000229389	23252	8977.56	31501.7	54741	LEPROT
ENSG00000171658	1.71307	2.88081e-06	18321.7	5695.66	31386.3	NA	NMRAL2P
ENSG00000242362	6.36959	0.0083597	4906.12	58.7317	31250	728090	CT47A2
ENSG00000107862	6.45725	0.00266626	4802.66	54.4878	31012	8729	GBF1
ENSG00000109572	6.80707	1.99812e-05	4540.02	42.0976	30904.3	1182	CLCN3
ENSG00000259129	1.72567	3.91158e-12	17854.7	5335.51	30811.2	100506433	LINC00648
ENSG00000071626	-1.424	0.00436682	21597.1	58223.6	30754.1	26528	DAZAP1
ENSG00000186026	4.62715	0.00305301	6635.71	242.293	30704.4	342909	ZNF284
ENSG00000178919	1.37203	4.71064e-09	22227.7	8241.61	30497.1	2304	FOXE1
ENSG00000265142	-2.1806	3.20433e-05	13984.4	62986	30494.3	102723167	MIR133A1HG
ENSG00000164294	-1.63027	6.41666e-13	18669.5	56112.3	30436.4	493869	GPX8
ENSG00000164970	6.44329	0.00262756	4711	49.5854	30354.3	203259	FAM219A
ENSG00000172500	1.16534	7.39e-08	25983	11446.2	30279	9158	FIBP
ENSG00000197614	-2.06091	3.93802e-21	14632.4	59682.3	30156.2	8076	MFAP5
ENSG00000176294	2.75309	1.48915e-17	10929	1581.05	30088.4	390429	OR4N2
ENSG00000256597	2.57462	6.78656e-06	11606.7	1971.1	29882.9	400087	LINC02393
ENSG00000110536	4.78124	0.00243067	6243.76	200.854	29852.9	114971	PTPMT1
ENSG00000103202	4.99702	5.13781e-08	5953.71	183.585	29750.8	4833	NME4
ENSG00000070214	4.65295	2.71644e-07	6373.22	240.927	29654.3	23446	SLC44A1
ENSG00000165996	1.51486	4.20598e-22	19568	6813.05	29642.9	9200	HACD1
ENSG00000196428	2.27264	1.09525e-07	12971.1	2785.8	29478.7	9819	TSC22D2
ENSG00000124657	1.56146	2.34378e-09	18854.2	6556.15	29440	26212	OR2B6
ENSG00000278073	2.22939	9.10277e-06	13185.8	2971.63	29396.3	102465434	MIR6726
ENSG00000243715	4.29521	0.00293513	6828.68	325.927	29330.6	100874237	CACNA2D3-AS1
ENSG00000233997	1.51415	1.24379e-07	19362.6	6783.54	29318	101927821	LINC01425
ENSG00000187091	-1.41982	2.27901e-07	20529	54957.1	29147.4	5333	PLCD1
ENSG00000196739	3.8445	1.28959e-08	7535.98	501.512	28972.1	85301	COL27A1
ENSG00000179476	-2.26627	1.88486e-07	12718.2	61025.9	28822.9	122525	C14orf28
ENSG00000201689	2.02843	7.18894e-08	14140.9	3507.12	28683.8	767610	SNORD114-29
ENSG00000143363	1.13613	2.85401e-08	25227.6	11372.2	28661.9	58497	PRUNE1
ENSG00000137760	3.15461	8.26483e-20	9053.61	1008.2	28560.6	91801	ALKBH8
ENSG00000104827	4.40882	4.37006e-05	6462.1	297.854	28490.2	1082	CGB3
ENSG00000168952	-2.48041	3.04884e-11	11434	64611.5	28360.9	29091	STXBP6
ENSG00000205097	-1.46001	1.66347e-10	19380.1	52791.1	28295.1	448831	FRG2
ENSG00000170954	6.00499	5.94446e-05	4709.1	68.9512	28278.1	55786	ZNF415
ENSG00000090674	-1.25061	0.00143257	22563	54877.7	28217.6	57192	MCOLN1
ENSG00000106459	1.49153	0.000929474	18865.1	6606.22	28137.8	4899	NRF1
ENSG00000160410	2.91981	3.14794e-09	9636.63	1228.59	28137.1	92799	SHKBP1
ENSG00000237624	1.29777	1.03725e-06	21681	8872.29	28137	NA	OXCT2P1
ENSG00000164307	-1.02098	6.95766e-09	27522.3	55043.1	28099.8	51752	ERAP1
ENSG00000115677	1.89754	5.48844e-21	14807.4	3986.22	28097.7	3069	HDLBP
ENSG00000166166	1.16693	3.10756e-10	23999	10613	28005.1	115708	TRMT61A
ENSG00000231674	3.63079	0.00127769	7685.46	587.659	27904.3	144776	LINC00410
ENSG00000163399	1.64605	2.12738e-14	16940.4	5295.66	27884.7	476	ATP1A1
ENSG00000103522	1.25795	7.89648e-05	22103.9	9472.1	27805.6	50615	IL21R
ENSG00000116329	1.18219	0.000131242	23518.7	9904.93	27803.5	4985	OPRD1
ENSG00000053900	1.6056	0.00472464	17250.6	5577.39	27697.6	29945	ANAPC4
ENSG00000213512	2.62117	0.000235828	10562.2	1678.02	27685.3	388646	GBP7
ENSG00000258436	1.04608	1.40465e-12	26448	12728.1	27666.7	493901	RNASE12
ENSG00000167112	1.85796	3.60488e-07	14871.5	4193.29	27630.7	26995	TRUB2
ENSG00000170412	3.52627	5.80354e-11	7800.66	741.463	27507.2	55890	GPRC5C
ENSG00000203661	2.08284	8.91621e-21	13206.5	3086.68	27507.1	401993	OR2T5
ENSG00000144868	1.72339	2.27245e-14	15836	4671.9	27291.7	66000	TMEM108
ENSG00000167562	2.19868	1.71338e-06	12379.3	2671.56	27218.1	55762	ZNF701
ENSG00000109133	2.9043	2.49086e-12	9345.98	1252.68	27143.5	55161	TMEM33
ENSG00000148158	1.801	2.41796e-05	15023.2	4184.71	27056.8	401548	SNX30
ENSG00000181751	-1.29567	5.37834e-07	20859.9	49713.5	27027.5	90355	C5orf30
ENSG00000100347	1.59032	1.40685e-06	16938.6	5374.27	26937.7	25813	SAMM50
ENSG00000255378	1.37869	3.94346e-08	19526.6	7336.63	26921.1	100133251	PRR23D2
ENSG00000108187	1.28285	0.000250646	20949.4	8565.02	26875	64081	PBLD
ENSG00000205307	1.66571	2.77421e-14	16102.8	4999.95	26822.6	100316904	SAP25
ENSG00000164163	1.12846	8.93706e-06	23735.6	10655.4	26784.6	6059	ABCE1
ENSG00000146842	2.20211	2.62099e-08	12130.3	2588.07	26712.3	84928	TMEM209
ENSG00000112679	1.28547	4.57673e-13	20735.6	8323.02	26655	56940	DUSP22
ENSG00000121053	4.92743	1.81074e-05	5378.37	174.341	26501.5	8288	EPX
ENSG00000185339	1.10869	1.29734e-11	23846.2	11043	26438.2	6948	TCN2
ENSG00000221421	1.46691	7.1749e-10	17973.1	6619.32	26364.9	100302265	MIR1283-1
ENSG00000232263	1.17745	0.00174568	22375.9	9709.46	26346.5	100131902	KRTAP25-1
ENSG00000056736	1.59743	1.68128e-05	16471.8	5354.07	26312.5	55540	IL17RB
ENSG00000207093	2.19812	0.0017929	11947.6	2533.78	26262.2	100033420	SNORD116-8
ENSG00000111328	6.23327	0.000289215	4210.12	56.7073	26242.8	8099	CDK2AP1
ENSG00000157933	-2.44443	7.54801e-15	10699.2	59224.6	26153.6	6497	SKI
ENSG00000205795	-1.09656	4.27293e-07	23740.6	49036	26033.1	192668	CYS1
ENSG00000234494	2.08423	5.13373e-09	12459.2	2860.85	25967.8	NA	SP2-AS1
ENSG00000264803	1.01834	1.01454e-09	25453.2	12562.2	25920.1	100422867	MIR378C
ENSG00000260880	2.7725	1.94305e-15	9302.17	1326.12	25790.3	283902	HCCAT5
ENSG00000168329	-1.75011	0.000746517	14726.2	52347.4	25772.5	1524	CX3CR1
ENSG00000183597	1.61028	5.72995e-14	15978.1	5240.02	25729.3	128989	TANGO2
ENSG00000223535	3.95802	2.16352e-08	6492.27	418.463	25696.6	441317	FAM90A17P
ENSG00000196132	1.22629	3.16921e-06	20949.4	9040.51	25690	4661	MYT1
ENSG00000261715	6.15083	0.00164535	4167	68.3659	25630.5	101927900	LINC01477
ENSG00000203910	1.64654	2.67126e-09	15561.6	4815.24	25622.7	388649	C1orf146
ENSG00000120690	-1.30975	1.6995e-07	19514.1	47425.8	25558.7	1997	ELF1
ENSG00000198521	-1.09253	7.28434e-12	23365	49396.5	25527	7594	ZNF43
ENSG00000133026	-1.97231	8.57957e-08	12920.9	50186.8	25484.1	4628	MYH10
ENSG00000227564	2.47779	3.10008e-19	10279.2	1866.51	25469.7	104355293	LINC00376
ENSG00000221065	4.0272	6.17406e-08	6320.44	384.561	25453.7	100422845	MIR1233-2
ENSG00000089327	1.34455	9.52505e-15	18916.3	7434.02	25433.9	53827	FXYD5
ENSG00000204961	1.88977	1.03073e-09	13369.6	3581.83	25265.4	9752	PCDHA9
ENSG00000143179	1.72865	1.24409e-10	14599.6	4358.44	25237.6	7371	UCK2
ENSG00000110315	2.33749	0.000117236	10773.5	2103.02	25183	50862	RNF141
ENSG00000125107	1.82185	5.97954e-06	13820.5	3859.49	25178.8	23019	CNOT1
ENSG00000184432	1.21882	3.94781e-06	20466.5	8572.95	24945	9276	COPB2
ENSG00000224209	1.10442	4.51585e-07	22582.3	10459	24940.3	NA	LINC00466
ENSG00000184786	1.01	1.98867e-10	24654.2	12132.8	24900.8	6991	TCTE3
ENSG00000247213	2.16738	0.000439166	11442.9	2496.39	24801.1	102723562	LINC01498
ENSG00000172487	-1.53245	7.86341e-08	16139.5	45687.9	24732.9	219477	OR8J1
ENSG00000146463	1.36573	1.43964e-12	18105.6	7050.8	24727.4	9202	ZMYM4
ENSG00000198221	1.13457	0.0060663	21753.6	9445.22	24681.1	653483	AFDN-DT
ENSG00000165617	-1.02257	0.000312627	24121.3	47196	24665.8	51339	DACT1
ENSG00000182854	-1.35282	5.2386e-05	18218.3	46870.6	24646.1	390649	OR4F15
ENSG00000081320	1.40989	0.000783182	17408.8	6360.22	24544.5	9262	STK17B
ENSG00000168148	-1.65172	4.12168e-12	14808.2	46653.9	24458.9	8290	HIST3H3
ENSG00000277474	2.1219	0.000274534	11525.2	2622.61	24455.3	102466759	MIR6894
ENSG00000165417	5.64883	0.00249688	4287.24	89.3171	24217.9	2957	GTF2A1
ENSG00000100038	-2.02716	2.35305e-11	11942.2	47294	24208.8	8940	TOP3B
ENSG00000163884	-2.42644	3.50162e-10	9920.34	52881	24071.1	28999	KLF15
ENSG00000170365	1.44005	2.29567e-05	16704	6299.41	24054.5	4086	SMAD1
ENSG00000073350	2.51839	5.63623e-09	9511.66	1606.71	23954	3993	LLGL2
ENSG00000130340	1.49481	1.19277e-08	15993.8	5553.63	23907.7	51429	SNX9
ENSG00000117632	1.38714	6.87465e-06	17175.3	6618.15	23824.4	3925	STMN1
ENSG00000248167	2.87928	4.34079e-10	8207.1	1105.59	23630.5	202658	TRIM39-RPP21
ENSG00000110917	5.52771	1.95651e-06	4263.59	90	23567.9	9761	MLEC
ENSG00000103197	2.07166	5.05571e-10	11348.6	2695.41	23510.5	7249	TSC2
ENSG00000122257	1.08662	1.31178e-10	21569.5	10016.6	23437.8	5930	RBBP6
ENSG00000109163	1.44776	0.00526257	16152.7	5766.37	23385.3	2798	GNRHR
ENSG00000148660	2.70117	1.66479e-07	8657.37	1327.44	23385	818	CAMK2G
ENSG00000247151	4.79473	0.000559388	4870.68	164.024	23353.6	338739	CSTF3-AS1
ENSG00000060566	1.93354	6.26182e-05	12046.4	3078.93	23292.1	84699	CREB3L3
ENSG00000270103	1.96096	4.14984e-07	11826.9	3039.9	23192.1	NA	AL360012.1
ENSG00000197921	1.49275	4.96092e-06	15522.1	5376.37	23170.5	388585	HES5
ENSG00000184270	1.17736	0.00421032	19661.3	8567.02	23148.3	317772	HIST2H2AB
ENSG00000167941	1.43894	0.000147142	16081	6007.78	23139.5	50964	SOST
ENSG00000007314	-2.27143	2.01366e-21	10132.6	48105.5	23015.5	6329	SCN4A
ENSG00000089199	-1.26258	1.99954e-07	18218.4	43528.3	23002.1	1114	CHGB
ENSG00000167646	1.31836	5.31409e-07	17409.9	6949.98	22952.5	352909	DNAAF3
ENSG00000118707	-1.39571	0.000136248	16418.1	41579.2	22914.9	60436	TGIF2
ENSG00000186446	1.14505	1.79337e-05	19995.3	8851.39	22895.7	115560	ZNF501
ENSG00000196734	-1.5694	2.94893e-08	14572.7	43306.5	22870.3	353132	LCE1B
ENSG00000176194	1.16285	9.02882e-06	19618.3	8554.37	22813.2	1149	CIDEA
ENSG00000277052	1.15279	6.52956e-07	19754.7	8866.15	22773	102465975	MIR6763
ENSG00000157259	4.76775	0.00432341	4766.12	175.659	22723.7	57798	GATAD1
ENSG00000101182	2.15907	7.45518e-07	10507	2285.61	22685.3	5688	PSMA7
ENSG00000106086	3.27076	3.137e-09	6914.1	713.61	22614.3	84725	PLEKHA8
ENSG00000107831	1.33338	2.31929e-05	16935	6591.29	22580.9	2253	FGF8
ENSG00000266640	2.0082	1.81428e-07	11228.3	2950.05	22548.6	100616168	MIR4754
ENSG00000104112	1.37552	1.09685e-08	16308.9	6324.54	22433.3	29106	SCG3
ENSG00000144366	1.12546	0.000147142	19909.7	9037.68	22407.5	51454	GULP1
ENSG00000170236	2.62361	4.35609e-07	8535.98	1320.73	22395.1	373509	USP50
ENSG00000111653	2.75596	1.07774e-08	8121.54	1181.8	22382.7	51147	ING4
ENSG00000112116	-3.31871	1.75935e-20	6737.85	66927.8	22361	112744	IL17F
ENSG00000145362	-1.12748	2.28152e-05	19823.6	43234.7	22350.8	287	ANK2
ENSG00000112659	1.04985	6.11551e-09	21236.7	10174.2	22295.2	23113	CUL9
ENSG00000196876	4.69581	0.00239493	4716.68	180.39	22148.6	6334	SCN8A
ENSG00000220161	1.86496	7.33901e-09	11872.9	3227.24	22142.5	400579	LINC02076
ENSG00000135678	-1.05532	0.000214037	20960.2	43866.1	22119.7	1368	CPM
ENSG00000015413	2.45661	3.4323e-05	8943	1590.46	21969.5	1800	DPEP1
ENSG00000181433	-3.6328	3.30259e-15	6023.54	74847.5	21882.3	55511	SAGE1
ENSG00000198021	1.17211	1.33334e-07	18626.8	8044.51	21832.7	30014	SPANXA1
ENSG00000140307	1.14719	4.17211e-09	19003.8	8536.88	21801	2958	GTF2A2
ENSG00000183020	3.20293	0.000436519	6743.12	685.22	21597.8	161	AP2A2
ENSG00000164161	1.43457	6.17887e-15	15049	5556.41	21588.9	64399	HHIP
ENSG00000253686	4.49584	0.00247408	4798.46	201.049	21573.1	101928136	LINC01484
ENSG00000011600	1.21157	0.000330382	17754.5	7670.29	21510.8	7305	TYROBP
ENSG00000277437	1.80781	8.60513e-07	11891.5	3346.51	21497.6	100500815	MIR3687-1
ENSG00000163597	1.53037	5.09156e-15	13960	4795.37	21364	100507246	SNHG16
ENSG00000087303	4.18324	2.00476e-06	5098.49	279.561	21328.2	22795	NID2
ENSG00000156508	1.6061	2.55805e-09	13255.2	4352.32	21289.2	1915	EEF1A1
ENSG00000088682	2.1182	0.00422022	10011.3	2232.85	21205.8	57017	COQ9
ENSG00000239713	1.413	1.00373e-05	14983.1	5288.61	21171.1	60489	APOBEC3G
ENSG00000106631	1.41523	9.81434e-06	14946.8	5532.88	21153.2	58498	MYL7
ENSG00000186615	3.48995	0.000258641	5987.12	594.293	20894.7	100129075	KTN1-AS1
ENSG00000119535	2.60473	2.62787e-05	7992.34	1309.17	20817.9	1441	CSF3R
ENSG00000223638	2.76046	2.37739e-15	7520.05	1096.2	20758.8	342931	RFPL4A
ENSG00000230921	4.37365	7.7232e-08	4731	234.195	20691.7	100874270	HAO2-IT1
ENSG00000166881	1.53304	2.82503e-10	13481.7	4674.39	20667.9	23306	NEMP1
ENSG00000125821	4.38022	3.81698e-07	4709.95	218	20630.6	92675	DTD1
ENSG00000117676	4.05355	1.18892e-05	5085.15	296.732	20612.9	6195	RPS6KA1
ENSG00000265521	1.24484	1.34439e-10	16498.7	6965.76	20538.2	100847055	MIR5697
ENSG00000204165	1.89065	0.000730564	10837.1	2849.56	20489.3	158830	CXorf65
ENSG00000085274	-1.75856	6.31109e-05	11596.3	38553.4	20392.8	55892	MYNN
ENSG00000198133	-2.26139	2.15519e-12	9011.71	42027	20379	161145	TMEM229B
ENSG00000183617	4.39357	0.00446796	4638.05	223.415	20377.6	116541	MRPL54
ENSG00000221586	3.4346	1.40032e-11	5927.61	531.683	20359	100302228	MIR1261
ENSG00000226929	1.52181	0.000122193	13268.2	4451.66	20191.7	255313	CT47A11
ENSG00000161896	2.40707	0.000115351	8387.9	1545.27	20190.2	117283	IP6K3
ENSG00000172889	2.06536	0.00275919	9772.32	2247.24	20183.3	51162	EGFL7
ENSG00000126945	1.98275	9.09878e-06	10072.5	2455.63	19971.3	3188	HNRNPH2
ENSG00000257585	-2.50507	1.53619e-06	7955.63	46459.9	19929.5	101101773	LINC00609
ENSG00000147140	-2.96682	1.21332e-14	6716.61	52331.7	19927	4841	NONO
ENSG00000205352	1.23073	1.025e-05	16079.5	6538.59	19789.5	54458	PRR13
ENSG00000116396	4.25955	5.42698e-05	4641.02	237.878	19768.7	3749	KCNC4
ENSG00000008988	1.51677	2.28077e-07	13014.9	4601.61	19740.6	6224	RPS20
ENSG00000251655	1.69605	0.000888643	11618.4	3438.9	19705.4	5542	PRB1
ENSG00000011132	2.23539	0.00131895	8755	1792.98	19570.9	9546	APBA3
ENSG00000101152	4.61774	0.00787708	4231.98	180.878	19542.2	80331	DNAJC5
ENSG00000265806	1.0905	0.000753356	17692.9	8104.54	19294.1	100422860	MIR4292
ENSG00000138483	-3.19861	3.20037e-08	6022.54	55645.9	19263.7	84692	CCDC54
ENSG00000163606	1.02198	0.000155398	18717	9165.49	19128.4	131450	CD200R1
ENSG00000265962	1.18492	7.53063e-07	16129	6913.59	19111.5	100287082	GACAT2
ENSG00000101670	1.35587	7.81055e-05	14085.1	5430.9	19097.5	9388	LIPG
ENSG00000121068	1.10036	0.00243521	17343.7	8183.12	19084.3	6909	TBX2
ENSG00000176358	-1.12961	6.27672e-10	16827.4	35850	19008.4	255061	TAC4
ENSG00000163900	2.09706	3.41201e-05	9046.88	2126.46	18971.8	90407	TMEM41A
ENSG00000005194	1.06185	0.000263419	17731.8	8546.68	18828.6	57019	CIAPIN1
ENSG00000100124	1.54165	9.54907e-13	12183.4	4197.49	18782.5	129138	ANKRD54
ENSG00000125637	1.28732	1.88521e-13	14575.9	5916.29	18763.8	23550	PSD4
ENSG00000158109	2.27056	5.56679e-06	8261.22	1731.63	18757.6	127262	TPRG1L
ENSG00000244057	1.32977	7.32301e-09	14077.7	5455.95	18720.1	353144	LCE3C
ENSG00000188986	1.00901	0.0017875	18532.4	9132.95	18699.4	25920	NELFB
ENSG00000264553	1.86905	1.18774e-09	9937.51	2813.9	18573.7	100422997	MIR4257
ENSG00000186579	-3.50403	1.54487e-12	5284.34	60744.3	18516.5	245909	DEFB106A
ENSG00000215845	1.28229	2.6694e-05	14294	5920.49	18329.2	100131187	TSTD1
ENSG00000115414	2.83686	9.92835e-08	6438.68	917.049	18265.6	2335	FN1
ENSG00000184178	-1.43021	0.00391498	12712.3	36549.4	18181.3	152579	SCFD2
ENSG00000199574	-1.37147	8.97536e-16	13244.8	34235	18164.8	595100	SNORD18C
ENSG00000251474	-1.21001	1.51193e-07	15001.2	34075.9	18151.6	NA	RPL32P3
ENSG00000207421	-1.30965	0.000433249	13816.4	35998.2	18094.8	NA	SNORD38B
ENSG00000161929	1.12945	1.38767e-07	16017	7188.39	18090.4	388325	SCIMP
ENSG00000267470	1.62228	1.66391e-14	11146.7	3572.22	18083.1	100507433	ZNF571-AS1
ENSG00000241697	-2.43981	9.2868e-06	7395.2	39168.3	18042.9	8577	TMEFF1
ENSG00000111291	2.19204	4.56926e-09	8162.2	1733.51	17891.9	55507	GPRC5D
ENSG00000234068	1.72453	1.24066e-05	10367.5	3035.56	17879.1	203569	PAGE2
ENSG00000234736	-3.41196	8.84053e-14	5232.22	56571.1	17852.1	100506733	FAM170B-AS1
ENSG00000167671	3.22038	9.25998e-09	5526.34	585.61	17796.9	80700	UBXN6
ENSG00000180357	2.50907	2.35949e-06	7071.27	1367.73	17742.3	23060	ZNF609
ENSG00000225940	1.58868	4.09838e-09	11156.3	3731.88	17723.8	101928448	C5orf67
ENSG00000230430	1.36672	1.15651e-06	12965.1	4934.46	17719.6	728373	USP17L25
ENSG00000108061	2.28377	7.0724e-09	7757.59	1585.44	17716.6	8036	SHOC2
ENSG00000122378	1.7653	6.33214e-21	10032.8	2916.24	17711	84293	FAM213A
ENSG00000259384	-1.78647	0.000365718	9874.95	33000.4	17641.3	2688	GH1
ENSG00000165434	1.01379	0.00681795	17295.5	8245.51	17534	283209	PGM2L1
ENSG00000144848	-2.44905	4.48061e-14	7143.17	37051.1	17494	64422	ATG3
ENSG00000243056	-2.51523	0.000438286	6912.56	36552.7	17386.7	8637	EIF4EBP3
ENSG00000105695	-1.72236	2.73998e-08	10059.3	33613.1	17325.7	4099	MAG
ENSG00000164144	1.93604	2.44934e-11	8932.15	2296	17293	27236	ARFIP1
ENSG00000160606	2.03031	0.000643289	8503.24	1966.05	17264.2	116238	TLCD1
ENSG00000198795	2.15932	9.08813e-13	7983.17	1772.1	17238.2	25925	ZNF521
ENSG00000186526	1.32791	1.73404e-12	12901.7	5124.05	17132.3	11283	CYP4F8
ENSG00000169248	2.35074	0.0010426	7272.39	1414.54	17095.5	6373	CXCL11
ENSG00000165637	2.81436	3.08595e-05	6062.24	896.707	17061.3	7417	VDAC2
ENSG00000185245	-1.61812	0.00277815	10500.9	31268.3	16991.8	2811	GP1BA
ENSG00000092094	2.78077	4.18646e-09	6079.78	945.171	16906.5	55644	OSGEP
ENSG00000185958	-1.12922	0.000706249	14970.9	31568.4	16905.4	121006	FAM186A
ENSG00000075234	3.60331	2.02188e-10	4684.29	368.805	16879	55020	TTC38
ENSG00000158805	3.6208	8.00161e-07	4661.56	408.439	16878.6	92822	ZNF276
ENSG00000108381	1.71383	1.56556e-08	9793.95	2961.66	16785.2	443	ASPA
ENSG00000181626	1.19255	7.11183e-16	14061.4	6124.46	16768.9	342850	ANKRD62
ENSG00000263987	1.36149	7.00021e-08	12202.3	4654.22	16613.2	100847024	MIR5698
ENSG00000131142	1.09295	0.00248892	15176	7168.49	16586.5	6370	CCL25
ENSG00000160299	1.33986	3.5638e-08	12370	4733.76	16574.1	5116	PCNT
ENSG00000090889	2.27941	7.68681e-13	7269.83	1468.68	16570.9	24137	KIF4A
ENSG00000237751	2.42007	9.93032e-06	6844.44	1277.29	16564	104355141	LINC01143
ENSG00000181045	-1.91001	1.93047e-07	8644.34	31597.8	16510.8	284129	SLC26A11
ENSG00000137766	-3.38863	8.31167e-10	4867.34	49082.1	16493.6	440279	UNC13C
ENSG00000177830	-2.39622	2.49144e-05	6881.78	35532.9	16490.2	66005	CHID1
ENSG00000112186	2.65474	0.000722036	6206.59	997.537	16476.9	10486	CAP2
ENSG00000244302	1.44851	4.62718e-09	11326	4144.76	16405.9	101928790	PEX5L-AS2
ENSG00000073598	2.15192	2.44345e-11	7607.95	1661.29	16371.7	54752	FNDC8
ENSG00000156486	1.81983	1.30303e-16	8977.56	2533.54	16337.7	3788	KCNS2
ENSG00000234161	2.51636	3.69799e-11	6461.49	1147.1	16259.4	102724167	PABPC5-AS1
ENSG00000232977	-2.0733	5.28864e-10	7839.51	32370	16253.6	100506697	LINC00327
ENSG00000115828	2.3494	1.48891e-06	6870	1376.49	16140.4	25797	QPCT
ENSG00000103160	2.21188	8.0536e-06	7272.12	1575.98	16085	83693	HSDL1
ENSG00000157020	-1.54155	3.44367e-05	10371.9	30137.9	15988.8	6396	SEC13
ENSG00000182165	-1.03169	4.63414e-05	15340.7	31499.7	15826.9	NA	TP53TG1
ENSG00000278265	2.00339	0.000399043	7898.56	1945.34	15823.9	102465461	MIR6770-1
ENSG00000131781	2.92028	1.88701e-10	5378	720.537	15705.3	2330	FMO5
ENSG00000167981	1.03418	0.000358059	15176.4	7727.05	15695.1	146434	ZNF597
ENSG00000199035	-2.11648	4.26133e-09	7306.93	31567.1	15464.9	406895	MIR103A1
ENSG00000156162	2.98742	1.06813e-07	5176.41	655.439	15464.1	286148	DPY19L4
ENSG00000075415	1.75648	1.7128e-12	8788.51	2575.17	15436.9	5250	SLC25A3
ENSG00000173706	1.24604	4.97371e-08	12331.8	5229.78	15365.9	57493	HEG1
ENSG00000105675	3.76981	0.000156747	4074.22	284.488	15359	495	ATP4A
ENSG00000119632	1.03723	8.18428e-08	14720	7128.49	15268	83982	IFI27L2
ENSG00000106624	1.02682	3.9455e-08	14860.4	7317.22	15258.9	165	AEBP1
ENSG00000187689	-1.19322	2.38639e-10	12780.2	28705.7	15249.6	401138	AMTN
ENSG00000138398	3.40963	2.02979e-07	4467.02	412.122	15230.9	9360	PPIG
ENSG00000089094	1.60643	1.0624e-07	9435.22	3048.68	15157	84678	KDM2B
ENSG00000277521	1.54074	9.98379e-06	9790.56	3326.24	15084.7	102466878	MIR8078
ENSG00000115112	-1.82623	5.28392e-11	8252.49	28735.5	15070.9	29842	TFCP2L1
ENSG00000013297	-1.71134	0.00278863	8774.93	27525.8	15016.9	5010	CLDN11
ENSG00000177096	2.95144	5.96572e-07	5081.12	646.195	14996.6	150368	FAM109B
ENSG00000267535	1.48991	2.3801e-05	10053.6	3494.49	14978.9	283994	LINC00868
ENSG00000188171	1.02309	1.7945e-06	14578.8	7131.8	14915.3	199777	ZNF626
ENSG00000119707	3.33704	0.00221646	4465.34	451.902	14901	58517	RBM25
ENSG00000133393	-1.62279	3.48979e-08	9174.98	28781.3	14889.1	123811	FOPNL
ENSG00000207641	-2.08268	6.59326e-12	7146.37	29260.9	14883.6	574515	MIR510
ENSG00000207651	2.89144	1.77437e-10	5114.1	669.927	14787.1	407020	MIR28
ENSG00000181449	1.08523	5.11475e-08	13623.5	6345.71	14784.7	6657	SOX2
ENSG00000254413	3.26673	0.00436409	4524.9	453.561	14781.6	NA	CHKB-CPT1B
ENSG00000173890	2.34199	7.69995e-05	6310.9	1200.85	14780.1	26996	GPR160
ENSG00000129845	1.82314	1.16565e-12	8046.2	2301.54	14669.3	50858	TTTY1
ENSG00000164109	1.30187	2.15589e-08	11116.9	4412.07	14472.7	4085	MAD2L1
ENSG00000125816	1.90405	1.71338e-06	7579.17	1943.34	14431.1	644524	NKX2-4
ENSG00000015133	2.266	1.31925e-15	6364.22	1336.63	14421.3	440193	CCDC88C
ENSG00000110786	3.51396	3.77711e-16	4098.95	343.805	14403.5	84867	PTPN5
ENSG00000133640	2.61305	0.00235043	5500	855.073	14371.8	84125	LRRIQ1
ENSG00000230594	-2.44448	6.41002e-18	5802.24	31340.4	14183.5	728075	CT47A4
ENSG00000111962	-1.15865	0.0067053	12211.9	26798.6	14149.3	10090	UST
ENSG00000236424	1.08887	4.05571e-09	12921	6070.73	14069.3	100289087	TSPY10
ENSG00000122035	2.33143	0.000289653	6032.83	1185.73	14065.1	387496	RASL11A
ENSG00000164099	-2.4178	5.71056e-15	5809.12	30591.6	14045.3	8492	PRSS12
ENSG00000104973	-1.31148	6.78656e-06	10617.6	26594.6	13924.8	81857	MED25
ENSG00000139508	2.93851	5.39441e-10	4736.24	593.293	13917.5	283537	SLC46A3
ENSG00000204257	1.63492	0.000193932	8450.66	2755.98	13816.1	3108	HLA-DMA
ENSG00000104131	3.08392	1.10233e-05	4472.83	593.22	13793.8	8669	EIF3J
ENSG00000140262	-1.0949	4.28352e-09	12577.2	26350.6	13770.8	6938	TCF12
ENSG00000147223	1.24626	0.00740082	11043.3	4471.76	13762.9	92129	RIPPLY1
ENSG00000181649	-1.10038	1.64285e-06	12501.1	25967	13756	7262	PHLDA2
ENSG00000173846	3.44469	1.60824e-12	3935.32	346.732	13555.9	1263	PLK3
ENSG00000279395	3.06753	0.00600944	4403.29	503.024	13507.2	219437	OR5L1
ENSG00000189037	-1.05726	3.08982e-07	12752	26065.7	13482.2	63904	DUSP21
ENSG00000265993	3.37185	0.000228115	3979.85	373.195	13419.5	100847064	MIR5694
ENSG00000006611	-2.29861	0.000324115	5834.15	27639.6	13410.4	10083	USH1C
ENSG00000165632	-1.67464	2.05728e-07	8001.49	25348.8	13399.6	83860	TAF3
ENSG00000177693	1.12062	1.98921e-09	11937.4	5453.9	13377.2	26682	OR4F4
ENSG00000131748	1.78299	1.68454e-08	7494.76	2160.78	13363.1	10948	STARD3
ENSG00000112984	-1.05921	0.000412774	12563.7	26883.1	13307.6	10112	KIF20A
ENSG00000278261	2.10779	3.73308e-09	6271.73	1414.93	13219.5	NA	SNORD1A
ENSG00000158691	2.6831	5.72338e-15	4891.41	770.293	13124.2	9753	ZSCAN12
ENSG00000215912	1.13094	2.17312e-08	11599.3	5238.12	13118.2	100287898	TTC34
ENSG00000207001	3.2056	2.23583e-06	4083.83	444.902	13091.1	100033414	SNORD116-2
ENSG00000115604	1.91802	0.000701723	6773.05	1772.02	12990.8	8809	IL18R1
ENSG00000164265	1.03331	1.67391e-06	12569.9	6131.27	12988.5	117156	SCGB3A2
ENSG00000131686	1.53045	4.78548e-09	8466.44	2902.98	12957.4	765	CA6
ENSG00000111335	1.17534	0.000267353	10974.5	4724.78	12898.8	4939	OAS2
ENSG00000092439	1.56392	1.64625e-08	8239.73	2738.39	12886.3	54822	TRPM7
ENSG00000224389	-1.56198	0.000231028	8220.98	23070.3	12841	721	C4B
ENSG00000164169	2.6671	0.000842915	4787.41	740.268	12768.5	90826	PRMT9
ENSG00000266079	1.1897	1.66142e-06	10692.5	4732.12	12720.9	677882	SNORA59B
ENSG00000184788	3.04716	0.000807214	4173.41	490.39	12717.1	340562	SATL1
ENSG00000164385	2.21224	8.96652e-09	5746.63	1198.98	12712.9	154386	LINC01600
ENSG00000188199	1.43717	4.61078e-06	8789.68	3379.41	12632.3	729262	NUTM2B
ENSG00000203811	2.24329	3.27741e-09	5624.68	1154.83	12617.8	126961	HIST2H3C
ENSG00000240403	-1.25167	0.000313893	10078.4	24039.9	12614.9	3812	KIR3DL2
ENSG00000162174	-2.30817	1.31925e-15	5453.2	26879.1	12586.9	80150	ASRGL1
ENSG00000168913	2.28094	1.34687e-10	5463.46	1127.9	12461.8	375704	ENHO
ENSG00000173598	-1.0875	0.000399632	11454.7	24023.5	12456.9	11163	NUDT4
ENSG00000196550	1.07379	0.0013828	11525.7	5309.56	12376.2	554282	FAM72A
ENSG00000256771	2.34741	4.39611e-09	5258.98	1034.29	12345	56242	ZNF253
ENSG00000207577	3.07918	1.33154e-14	3999.27	457.561	12314.5	693172	MIR587
ENSG00000065057	2.47072	5.85812e-05	4979.05	883.317	12301.9	4913	NTHL1
ENSG00000198715	2.07888	1.65201e-07	5907.41	1339.73	12280.8	112770	GLMP
ENSG00000243284	1.0733	2.52138e-05	11327.3	5392.78	12157.6	391123	VSIG8
ENSG00000184330	1.59875	2.26869e-05	7579.05	2408.8	12117	338324	S100A7A
ENSG00000214401	2.04911	0.000147805	5857.93	1412.54	12003.5	644246	KANSL1-AS1
ENSG00000137098	-1.64914	2.85193e-08	7245.32	22160.6	11948.5	26206	SPAG8
ENSG00000163254	1.68673	3.40957e-09	7033.27	2127.49	11863.2	1420	CRYGC
ENSG00000135604	-3.18474	2.48257e-09	3715.37	32945.8	11832.5	8676	STX11
ENSG00000234465	-2.34677	3.71335e-08	5030.51	26200.7	11805.4	390940	PINLYP
ENSG00000267322	1.8573	5.49686e-05	6264.12	1782.93	11634.3	677769	SNHG22
ENSG00000159224	1.57405	0.00875839	7290.07	2352.76	11474.9	2695	GIP
ENSG00000197893	1.17709	1.17981e-06	9725.07	4306.73	11447.3	4892	NRAP
ENSG00000162654	-1.56114	5.68265e-05	7328.39	21048.1	11440.7	115361	GBP4
ENSG00000264349	2.429	5.3946e-05	4690.07	1041.78	11392.2	100423020	MIR4258
ENSG00000118454	1.31614	0.000292308	8608.76	3337.98	11330.3	81573	ANKRD13C
ENSG00000134594	1.04681	1.13262e-05	10798.2	5303.46	11303.7	9363	RAB33A
ENSG00000119943	1.96296	1.08931e-16	5753.32	1468.59	11293.5	84795	PYROXD2
ENSG00000248746	1.77713	3.98823e-09	6336.39	1753.88	11260.6	89	ACTN3
ENSG00000114686	1.34641	2.24245e-06	8344.66	3250.05	11235.3	11222	MRPL3
ENSG00000196778	1.20057	0.00131676	9327.54	3998.61	11198.3	390036	OR52K1
ENSG00000213563	1.96133	8.42431e-06	5697.59	1484.05	11174.8	414919	C8orf82
ENSG00000259207	1.09558	2.23656e-10	10146.6	4716.46	11116.4	3690	ITGB3
ENSG00000198650	1.2591	3.43914e-07	8812.66	3585.73	11096	6898	TAT
ENSG00000130830	2.87922	0.0060818	3848.1	534.341	11079.5	4354	MPP1
ENSG00000137841	1.77961	7.95976e-08	6192.07	1764.41	11019.5	5330	PLCB2
ENSG00000108691	1.44808	0.000922558	7552.83	2775.9	10937.1	6347	CCL2
ENSG00000165804	1.41778	2.329e-05	7626.54	2748.73	10812.8	51222	ZNF219
ENSG00000196466	1.08376	0.00691015	9947.12	4601.85	10780.3	90576	ZNF799
ENSG00000165821	2.51885	3.86365e-05	4278.39	758.756	10776.6	6297	SALL2
ENSG00000164011	1.64551	6.11494e-10	6534.46	2115.68	10752.5	51058	ZNF691
ENSG00000127241	-1.19702	4.28604e-11	8977.63	20532.2	10746.4	5648	MASP1
ENSG00000223109	1.5928	0.00691972	6622.56	2102.1	10548.4	100302119	MIR1538
ENSG00000134480	-2.48673	1.30261e-05	4240.05	23490.1	10543.9	902	CCNH
ENSG00000087903	1.67533	9.28917e-07	6280.83	1949.24	10522.4	5990	RFX2
ENSG00000070010	-1.97729	6.05782e-10	5300.68	20629.6	10481	7353	UFD1
ENSG00000166428	1.39569	7.27297e-08	7428.17	2777.27	10367.4	122618	PLD4
ENSG00000233405	-1.10969	1.75525e-11	9327.66	19903.1	10350.8	103689843	LINC01046
ENSG00000176697	-2.11768	3.63533e-09	4879.1	20867.8	10332.4	627	BDNF
ENSG00000277391	2.05303	5.41675e-07	5031	1179.68	10328.8	102465530	MIR6881
ENSG00000255408	1.1914	0.00147496	8644.29	4193.27	10298.8	56145	PCDHA3
ENSG00000264824	2.37608	1.6995e-07	4318.24	831.268	10260.5	100847006	MIR5571
ENSG00000255072	1.1117	1.1894e-10	9151.51	4227.83	10173.8	84992	PIGY
ENSG00000113649	-2.93969	0.00016094	3457.49	25441.9	10164	10915	TCERG1
ENSG00000129757	1.6514	0.00101317	6124.98	1912.59	10114.8	1028	CDKN1C
ENSG00000105991	2.28361	0.000163029	4426.85	900.78	10109.2	3198	HOXA1
ENSG00000188523	2.55377	0.00411642	3948.54	649.707	10083.6	389799	CFAP77
ENSG00000251173	1.03697	0.00210111	9641.85	4534.39	9998.36	101410542	UCHL1-AS1
ENSG00000187514	2.26365	0.00659613	4414.2	875.39	9992.18	5757	PTMA
ENSG00000231453	-1.70967	0.00122331	5737.73	18579	9809.63	285084	LINC01305
ENSG00000173757	2.07155	3.08808e-07	4732.85	1113.51	9804.36	6777	STAT5B
ENSG00000223546	-1.46614	9.688e-06	6681.88	17882.5	9796.59	NA	LINC00630
ENSG00000022355	1.79623	1.66979e-08	5437.37	1553.83	9766.75	2554	GABRA1
ENSG00000171004	1.06577	1.08452e-06	9159.93	4341.27	9762.41	90161	HS6ST2
ENSG00000198952	-1.17776	1.68733e-08	8288.63	18893.7	9762.04	23381	SMG5
ENSG00000156234	1.37789	3.82932e-06	7078.05	2770.22	9752.78	10563	CXCL13
ENSG00000113048	2.54187	0.00033623	3834.29	663.317	9746.28	23107	MRPS27
ENSG00000170832	2.506	5.63514e-07	3877.15	672.463	9716.15	84669	USP32
ENSG00000207221	1.62278	0.00734448	5986.2	1969.24	9714.25	100379250	SNORA70E
ENSG00000264425	2.06716	6.43708e-07	4685.88	1045.8	9686.44	100616117	MIR4653
ENSG00000105376	1.50174	0.00020455	6434.8	2340.61	9663.43	7087	ICAM5
ENSG00000259944	1.38654	0.00136646	6926.2	2653.22	9603.46	94150	CDRT7
ENSG00000125657	2.56167	4.78949e-07	3713.49	613.146	9512.74	8744	TNFSF9
ENSG00000176890	-1.25219	1.23852e-05	7558.98	17427.2	9465.24	7298	TYMS
ENSG00000177283	-1.28239	1.2602e-10	7377.76	17710.3	9461.14	8325	FZD8
ENSG00000278123	-2.21576	0.000259707	4234.51	19660.6	9382.67	NA	SNORD116-28
ENSG00000089063	1.16598	9.43106e-05	7958.76	3523.63	9279.74	29058	TMEM230
ENSG00000115568	1.68077	6.53769e-06	5509.93	1744.17	9260.89	7701	ZNF142
ENSG00000177842	-2.21939	8.61496e-05	4159.41	18999.1	9231.38	253639	ZNF620
ENSG00000263795	1.33557	1.17288e-05	6909.71	2712.78	9228.43	100847014	MIR5100
ENSG00000110435	1.3449	1.31332e-09	6851.56	2666.29	9214.64	8050	PDHX
ENSG00000242485	2.20614	0.000112232	4157.17	893.195	9171.31	55052	MRPL20
ENSG00000114784	-1.05533	0.000557661	8609.05	17825.3	9085.35	10289	EIF1B
ENSG00000266074	-1.95315	3.96591e-13	4649.37	17877.6	9080.91	57597	BAHCC1
ENSG00000137275	1.12443	1.61494e-09	8074.85	3668.44	9079.59	8737	RIPK1
ENSG00000265137	1.85657	1.98133e-14	4884.05	1338.15	9067.6	100422875	MIR3192
ENSG00000164106	-1.77578	3.35464e-09	5079.95	17054.7	9020.86	11341	SCRG1
ENSG00000166569	-4.29632	3.60315e-05	2099.49	41786.6	9020.06	339302	CPLX4
ENSG00000241794	1.4115	1.39373e-05	6355.29	2380.8	8970.48	6700	SPRR2A
ENSG00000177383	-1.02312	0.00105539	8758.66	17308.8	8961.12	64110	MAGEF1
ENSG00000263511	1.01714	0.00549721	8754.73	4278	8904.78	100847086	MIR5699
ENSG00000168818	1.58872	2.62545e-06	5576.15	1825.95	8858.95	53407	STX18
ENSG00000165502	-1.10744	2.99788e-07	7963.93	16847	8819.6	6166	RPL36AL
ENSG00000221563	1.83792	3.61481e-07	4739.98	1271.46	8711.71	100302177	MIR1269A
ENSG00000169744	1.24126	0.00784459	7001.39	2964.37	8690.56	9079	LDB2
ENSG00000187097	1.43375	7.76135e-06	5876.68	2159.98	8425.72	957	ENTPD5
ENSG00000184470	1.3268	0.0051939	6348.85	2481.56	8423.67	10587	TXNRD2
ENSG00000078061	1.98666	8.11228e-08	4233.07	1047.22	8409.67	369	ARAF
ENSG00000182687	-1.11662	1.31402e-09	7522.49	16078	8399.8	8811	GALR2
ENSG00000137815	2.10714	4.9169e-06	3941.12	947.61	8304.5	23168	RTF1
ENSG00000186970	1.21992	2.2829e-07	6784.63	2890.95	8276.7	254950	KRTAP15-1
ENSG00000132840	-4.34723	0.00865195	1903.76	37197.6	8276.07	23743	BHMT2
ENSG00000199266	-1.34766	5.43839e-05	6112.76	15298.8	8237.89	677837	SNORA60
ENSG00000148672	1.76682	0.000459371	4656.39	1357.27	8227	2746	GLUD1
ENSG00000255974	1.77348	3.81951e-05	4619.98	1349.73	8193.43	1548	CYP2A6
ENSG00000166886	2.24486	4.18393e-11	3595.78	751.902	8072.04	4665	NAB2
ENSG00000237413	1.73629	0.00676864	4616.15	1353.85	8014.95	149047	MGC27382
ENSG00000259572	1.65475	0.000717897	4804	1485.8	7949.41	101928442	LINC01491
ENSG00000185621	1.03388	6.96459e-06	7667.54	3768.39	7927.32	89782	LMLN
ENSG00000074054	-1.18065	3.21377e-05	6703.76	14842.2	7914.79	23332	CLASP1
ENSG00000224440	1.51817	1.13713e-05	5212.41	1802.68	7913.31	100129239	CXorf51A
ENSG00000216077	1.08933	0.000417084	7228.88	3297.39	7874.65	100126347	MIR887
ENSG00000120457	1.23053	0.000110121	6396.39	2716.41	7870.93	3762	KCNJ5
ENSG00000158887	-1.68679	0.0084508	4652.29	14487.2	7847.46	4359	MPZ
ENSG00000118482	1.46116	2.96276e-07	5316.49	1945.54	7768.25	23469	PHF3
ENSG00000262664	-1.82371	5.91637e-13	4259.27	15110.8	7767.67	124641	OVCA2
ENSG00000078549	1.10185	1.81551e-05	6993.51	3179.63	7705.83	117	ADCYAP1R1
ENSG00000099953	1.45797	2.79368e-05	5256.93	1914.17	7664.43	4320	MMP11
ENSG00000198483	-1.05624	3.89988e-05	7226.22	14899.4	7632.62	148741	ANKRD35
ENSG00000122565	-1.35086	0.000115776	5645.22	13974.4	7625.88	11335	CBX3
ENSG00000178928	1.85919	0.00383152	4101.71	1098.95	7625.84	284355	TPRX1
ENSG00000122512	1.11211	4.25551e-07	6845	3168.54	7612.37	5395	PMS2
ENSG00000222365	2.13341	0.00698549	3555.8	768.805	7585.98	NA	SNORD12B
ENSG00000101327	-2.32392	9.25828e-10	3237.27	16371.8	7523.15	5173	PDYN
ENSG00000260802	-1.93557	0.000525411	3882.54	14484.5	7514.93	401613	SERTM2
ENSG00000071967	1.6065	1.77825e-07	4662.88	1500.88	7490.92	79901	CYBRD1
ENSG00000122778	1.05674	3.30647e-09	7074.83	3396.61	7476.26	57670	KIAA1549
ENSG00000171847	1.3917	0.000265513	5357.85	2029.76	7456.54	55138	FAM90A1
ENSG00000168994	-1.08002	1.36623e-05	6873.9	14190.7	7423.97	221749	PXDC1
ENSG00000182199	-1.20436	0.00067763	6149.95	14604.3	7406.74	6472	SHMT2
ENSG00000120952	1.35766	3.37823e-07	5405.66	2098.44	7339.05	65122	PRAMEF2
ENSG00000130383	2.03309	1.99256e-05	3585.46	844.537	7289.58	2527	FUT5
ENSG00000147117	1.93865	0.00868033	3749.12	905.195	7268.23	7712	ZNF157
ENSG00000214736	2.0217	4.10425e-07	3566.39	854.732	7210.16	100188893	TOMM6
ENSG00000106327	-2.24752	1.79937e-09	3201.29	14970.2	7194.96	7036	TFR2
ENSG00000179142	1.08078	0.000187076	6570.46	3120.85	7101.22	1585	CYP11B2
ENSG00000175707	-2.63877	2.35931e-12	2675.02	16415.4	7058.77	126695	KDF1
ENSG00000145217	-1.0377	0.000264409	6794.22	13893	7050.34	10861	SLC26A1
ENSG00000111817	-1.37646	0.000262755	5083.9	12681.8	6997.77	29940	DSE
ENSG00000120265	1.69809	0.000948029	4108.44	1171	6976.52	5110	PCMT1
ENSG00000188089	1.13302	1.26593e-07	6138.2	2771.83	6954.72	123745	PLA2G4E
ENSG00000206260	-1.09163	3.81075e-10	6357.17	13384.2	6939.69	729627	PRR23A
ENSG00000111011	-1.05239	7.61739e-05	6574.98	13333.9	6919.45	65117	RSRC2
ENSG00000204480	-2.63006	2.83531e-09	2625.56	15568.5	6905.39	645414	PRAMEF19
ENSG00000141385	1.03491	1.58103e-05	6670.1	3167.39	6902.93	10939	AFG3L2
ENSG00000118733	1.25275	0.00233067	5460.34	2202.27	6840.43	118427	OLFM3
ENSG00000112981	1.22913	0.000562962	5541.93	2325.88	6811.76	8382	NME5
ENSG00000120217	1.54296	6.29838e-07	4406.41	1502.98	6798.93	29126	CD274
ENSG00000226978	1.94317	1.04272e-05	3456.85	858.561	6717.25	100874021	MAGI2-AS2
ENSG00000215559	1.13719	0.00116489	5888.85	2651.66	6696.77	391267	ANKRD20A11P
ENSG00000277387	1.89542	0.00731277	3499.29	943.171	6632.63	102465863	MIR8058
ENSG00000188846	1.3122	0.000122193	5024.1	1958.51	6592.61	9045	RPL14
ENSG00000215483	1.37497	6.37265e-05	4792.9	1828.9	6590.11	400123	LINC00598
ENSG00000165282	-1.27313	8.96748e-06	5146.29	12465.8	6551.88	84720	PIGO
ENSG00000203897	1.43577	0.000156338	4533.56	1675.05	6509.13	642864	SPATA42
ENSG00000254634	1.3609	7.51715e-08	4761.56	1858.76	6480.02	NA	SMG1P6
ENSG00000171951	1.61096	0.000111109	4002.9	1284.95	6448.51	7857	SCG2
ENSG00000141449	1.03403	0.000106665	6137.02	2989.49	6345.87	80000	GREB1L
ENSG00000137801	1.478	0.00409009	4229.8	1511.9	6251.65	7057	THBS1
ENSG00000189046	1.64576	0.00059742	3790.66	1308.8	6238.51	121642	ALKBH2
ENSG00000119487	1.16795	0.00875839	5301.49	2340.8	6191.86	79109	MAPKAP1
ENSG00000182700	-1.13135	0.000463849	5393.61	11916.1	6102.04	492311	IGIP
ENSG00000225190	1.46717	0.00142492	4155.95	1486.49	6097.49	9842	PLEKHM1
ENSG00000107562	-1.72171	3.75158e-07	3534.98	11800.9	6086.21	6387	CXCL12
ENSG00000205758	-1.14911	1.14306e-07	5295.56	11566.6	6085.19	9946	CRYZL1
ENSG00000093144	1.064	0.000211074	5678.37	2730.71	6041.8	55862	ECHDC1
ENSG00000248383	-1.2397	0.00016132	4815.29	11246.5	5969.52	56135	PCDHAC1
ENSG00000205549	-1.04361	0.000498181	5685.34	12484.9	5933.28	100129385	C9orf92
ENSG00000077157	-1.15914	6.10101e-06	5083.61	11396	5892.59	4660	PPP1R12B
ENSG00000124831	-1.15968	1.21756e-05	5035.93	11138.2	5840.05	9208	LRRFIP1
ENSG00000205869	-1.1191	7.14959e-05	5110.15	10770.1	5718.75	387264	KRTAP5-1
ENSG00000231752	1.12566	4.54672e-05	5067.22	2282.61	5703.97	647121	EMBP1
ENSG00000277481	-2.09957	2.75358e-10	2714.29	11221.2	5698.84	342372	PKD1L3
ENSG00000166435	-1.08407	8.88088e-05	5254.71	11236.4	5696.46	143570	XRRA1
ENSG00000251321	1.14153	5.78489e-08	4988.93	2266.05	5695	118425	PCAT4
ENSG00000143258	1.03382	0.000160702	5446.1	2598.63	5630.29	27005	USP21
ENSG00000141424	-1.24288	6.8838e-05	4496.54	10269.1	5588.63	25800	SLC39A6
ENSG00000111843	1.01641	0.000234868	5495.49	2724.32	5585.65	51522	TMEM14C
ENSG00000006118	1.24656	1.52469e-06	4448.32	1882.88	5545.1	54972	TMEM132A
ENSG00000268223	1.27334	1.48678e-08	4292.02	1758.41	5465.21	644100	ARL14EPL
ENSG00000167772	1.21704	5.6902e-05	4451.88	1844.37	5418.1	51129	ANGPTL4
ENSG00000187840	1.23364	6.06023e-07	4387.12	1872.17	5412.11	1978	EIF4EBP1
ENSG00000116147	-4.5959	0.000277656	1170.8	27085.9	5380.9	7143	TNR
ENSG00000198887	1.17777	0.00396038	4553.98	1983.05	5363.54	23137	SMC5
ENSG00000164252	1.68435	0.000286382	3164.76	1015	5330.57	55109	AGGF1
ENSG00000238121	-2.68538	2.9022e-09	1974.22	12857.6	5301.53	100188949	LINC00426
ENSG00000258584	1.26136	0.00387818	4099.78	1652.29	5171.3	283592	FAM181A-AS1
ENSG00000240268	-2.02019	3.611e-09	2521.71	10504.2	5094.33	NA	MOXD2P
ENSG00000172009	-2.06007	0.000628267	2471	9933.46	5090.44	7064	THOP1
ENSG00000133216	1.60914	1.78095e-06	3144.1	1043.24	5059.29	2048	EPHB2
ENSG00000169228	-1.13622	7.04064e-08	4374.63	9357.8	4970.55	53917	RAB24
ENSG00000116183	-5.66486	0.000217953	875.073	42796	4957.16	60676	PAPPA2
ENSG00000080608	-1.58787	0.000296782	3115.22	9269.8	4946.55	9933	PUM3
ENSG00000162882	-1.62954	0.000415165	3028.95	9135.1	4935.81	23498	HAAO
ENSG00000102572	-1.18803	0.00449488	4095.54	8942.63	4865.64	8428	STK24
ENSG00000236751	1.11641	0.0068055	4345	2011.17	4850.8	101927574	LINC01186
ENSG00000205809	-1.52406	3.34568e-06	3169.78	8856.59	4830.93	3822	KLRC2
ENSG00000135899	1.09055	6.43111e-05	4331.54	2066.9	4723.74	3431	SP110
ENSG00000250988	-4.51615	0.00120215	1044.07	23075.1	4715.19	100505616	SNHG21
ENSG00000242641	-3.13564	7.25104e-06	1464.85	12573.3	4593.25	440970	LINC00971
ENSG00000256164	-2.11851	9.42798e-06	2130.66	9561.85	4513.83	103752584	CCND2-AS1
ENSG00000161958	1.07876	0.000435613	4108.88	1931.29	4432.51	2256	FGF11
ENSG00000181085	-2.38605	6.48818e-05	1849.51	9470.44	4413.02	225689	MAPK15
ENSG00000233699	1.07006	1.01683e-06	4120.1	1972.68	4408.74	252950	TTTY18
ENSG00000212296	-1.10581	1.18147e-06	3951.51	8373.05	4369.63	619564	SNORD72
ENSG00000137745	1.05801	0.00596418	4102.56	2001.51	4340.56	4322	MMP13
ENSG00000225882	1.38716	0.000484958	3101.71	1240.05	4302.56	105373144	LINC01456
ENSG00000264292	1.12758	7.7021e-05	3647.76	1684.37	4113.15	100616360	MIR2467
ENSG00000130024	1.04608	0.00099014	3852.85	1823.93	4030.41	55274	PHF10
ENSG00000130724	1.09137	3.88345e-07	3681.93	1737.17	4018.33	27243	CHMP2A
ENSG00000196357	-1.14604	1.50009e-05	3476.27	7598.83	3983.95	147929	ZNF565
ENSG00000178074	1.19867	0.000183629	3303.12	1448.78	3959.37	205327	C2orf69
ENSG00000204599	1.00616	2.22559e-05	3898.71	1966.39	3922.74	56658	TRIM39
ENSG00000024048	-1.89632	0.00306582	2006.46	7477.85	3804.9	23304	UBR2
ENSG00000221763	-1.76297	4.49741e-09	2143.49	7130.83	3778.9	100302125	MIR1289-1
ENSG00000226419	-2.49874	3.43801e-05	1507.98	8445.56	3768.04	100506392	SLC16A1-AS1
ENSG00000141084	1.2525	0.00538391	3004.51	1245.76	3763.16	57610	RANBP10
ENSG00000179409	-3.99574	6.47927e-08	917.146	14955.5	3664.67	50628	GEMIN4
ENSG00000054938	-1.91878	0.0045731	1894.88	6869.49	3635.86	25884	CHRDL2
ENSG00000263834	-2.93281	1.02253e-20	1230.15	9385.54	3607.78	100616479	MIR4635
ENSG00000132256	1.0636	0.000332975	3373.93	1591.44	3588.51	85363	TRIM5
ENSG00000196664	1.10886	0.0034362	3197.07	1461.85	3545.11	51284	TLR7
ENSG00000137070	-2.00319	0.000146038	1755.44	6977.37	3516.47	3590	IL11RA
ENSG00000231920	-1.24287	0.000210941	2799.83	6665.78	3479.81	NA	NEBL-AS1
ENSG00000263513	-1.18572	0.00264568	2915.98	6361.27	3457.52	554282	FAM72C
ENSG00000213638	-2.10355	0.000376294	1643.66	7066.78	3457.51	113179	ADAT3
ENSG00000188820	-4.44294	9.10277e-06	751.829	15965.2	3340.33	441168	CALHM6
ENSG00000265527	-3.52459	2.06784e-06	929.732	10340.3	3276.92	100847048	MIR5690
ENSG00000134207	-2.54877	2.53608e-05	1256.1	7073.9	3201.51	148281	SYT6
ENSG00000276027	-2.19363	1.37159e-05	1446.41	6273.73	3172.9	267010	RNU12
ENSG00000179709	-2.01075	7.63725e-05	1577.68	6369.9	3172.32	126205	NLRP8
ENSG00000182450	-1.41914	0.00308884	2223.85	6115.56	3155.96	50801	KCNK4
ENSG00000076864	-1.55484	1.19691e-09	1976.41	5764.12	3073	5909	RAP1GAP
ENSG00000208018	1.00723	2.64467e-06	3005.37	1526.63	3027.1	693230	MIR645
ENSG00000103257	-1.59754	6.69085e-11	1893.98	5638.76	3025.71	8140	SLC7A5
ENSG00000264119	-2.17564	0.00673927	1380.37	6104.73	3003.18	100616161	MIR4795
ENSG00000213024	-3.6965	0.000223861	777.927	9522.24	2875.61	23636	NUP62
ENSG00000134597	-3.09626	2.74336e-14	926.341	8045.22	2868.19	51634	RBMX2
ENSG00000145623	-1.27818	4.7717e-08	2225.32	5313.9	2844.35	9180	OSMR
ENSG00000204930	-1.18006	0.000615062	2367.59	5220.12	2793.88	392307	FAM221B
ENSG00000231107	-2.50789	0.000321632	1076.78	6064.95	2700.44	101927873	LINC01508
ENSG00000135951	-1.50135	0.002613	1786.24	5126.41	2681.77	80705	TSGA10
ENSG00000113739	-2.06729	0.000535827	1294.9	5360.59	2676.93	8614	STC2
ENSG00000255009	-1.26843	4.37402e-10	2093.85	4924.41	2655.9	642623	UBTFL1
ENSG00000134684	-1.46094	2.00865e-07	1767.8	4775.07	2582.65	8565	YARS
ENSG00000157111	-2.16797	0.000617169	1186.07	5484.8	2571.37	134285	TMEM171
ENSG00000233354	-1.46452	0.00935515	1689.98	4561.46	2475	140875	LINC00028
ENSG00000176533	-3.13281	4.62181e-05	778.366	6687.9	2438.47	2788	GNG7
ENSG00000105287	-2.13153	0.00147263	1138.41	5197.88	2426.57	25865	PRKD2
ENSG00000106991	-3.18315	5.58324e-05	754.366	7061.41	2401.26	2022	ENG
ENSG00000112304	-2.00863	3.04646e-05	1193.2	4788.44	2396.68	55856	ACOT13
ENSG00000138378	-2.89686	0.00842296	815.829	5718.24	2363.34	6775	STAT4
ENSG00000115163	-2.61417	1.17677e-06	870.122	5193.24	2274.64	1058	CENPA
ENSG00000213246	-2.52461	0.000716965	894.707	5032.63	2258.79	6827	SUPT4H1
ENSG00000141696	-1.2057	0.001207	1826.63	4179.85	2202.37	10609	P3H4
ENSG00000156282	-1.51773	0.00995551	1442.32	4163.93	2189.05	26285	CLDN17
ENSG00000102854	-1.664	0.00146254	1226.17	3919.83	2040.35	10232	MSLN
ENSG00000170454	-1.05138	0.00122217	1849.85	3839.88	1944.89	9119	KRT75
ENSG00000207820	-3.1627	1.92977e-08	613.756	5429.17	1941.13	664614	MIR545
ENSG00000113569	-1.02252	0.00351446	1858.88	3668.78	1900.75	9631	NUP155
ENSG00000087116	-2.00521	3.26968e-08	945.537	3708.46	1896	9509	ADAMTS2
ENSG00000086289	-2.20236	6.17376e-05	846.049	3898.98	1863.3	54749	EPDR1
ENSG00000175676	-2.3617	0.00246882	784.317	4076.37	1852.32	100132979	GOLGA8EP
ENSG00000165832	-1.8482	5.3319e-05	996.439	3583.1	1841.62	142940	TRUB1
ENSG00000120885	-1.76742	0.0024679	954.756	3232	1687.46	1191	CLU
ENSG00000244094	-3.08463	0.000200125	466.512	3774.76	1439.02	6705	SPRR2F
ENSG00000260034	-4.39992	0.00319751	244.439	4909.34	1075.51	100506655	LCMT1-AS2

## Sheet: Table_S2
Table S2. Differentially expressed miRNAs. logFC: log2 fold change.
miRNA	logFC	FDR	Tumor	Normal	Delta
hsa-mir-21	1.19577	8.19224e-11	1.08924e+06	484174	1.30248e+06
hsa-mir-10b	3.81011	7.87975e-30	162056	13577.8	617449
hsa-mir-182	3.36412	3.14586e-21	79758.1	7299.95	268316
hsa-mir-183	3.96145	8.03904e-26	33449.4	1993.54	132508
hsa-mir-217	3.54312	1.68239e-11	10910	1154.34	38655.3
hsa-mir-1269a	5.66303	1.4086e-15	3468	95.9756	19639.4
hsa-mir-9-2	4.30003	4.89978e-18	4008.24	246	17235.6
hsa-mir-9-3	4.26279	6.06133e-18	4016.59	251.488	17121.9
hsa-mir-9-1	4.26239	6.06133e-18	4014.71	250.756	17112.3
hsa-mir-200c	2.37977	9.19803e-06	2727.66	379.659	6491.2
hsa-mir-891a	8.86653	6.52427e-14	574.732	1.17073	5095.87
hsa-mir-552	6.17434	2.70077e-13	702.195	10.878	4335.59
hsa-mir-452	2.04822	2.72546e-10	1542.02	412.341	3158.41
hsa-mir-1269b	5.57094	7.23868e-07	440.341	8.53659	2453.11
hsa-mir-224	2.37147	5.49954e-10	739.902	151.39	1754.65
hsa-mir-3923	7.94124	2.11373e-09	167.098	0.585366	1326.96
hsa-mir-767	8.99037	2.20207e-16	110.756	0.170732	995.739
hsa-mir-216a	3.33449	3.38435e-10	295.024	34.6829	983.755
hsa-mir-216b	3.40334	1.6215e-10	237.341	27.6829	807.755
hsa-mir-105-2	8.90799	1.65446e-14	84.3415	0.121951	751.313
hsa-mir-520a	7.00665	3.1398e-07	106.415	1.14634	745.61
hsa-mir-526b	6.26816	8.06992e-07	118.561	2.4878	743.159
hsa-mir-105-1	8.19189	3.0493e-13	84.9268	0.317073	695.712
hsa-mir-221	1.02159	2.04875e-07	680.61	348.902	695.304
hsa-mir-196b	2.26891	4.26662e-09	304.463	64.6829	690.799
hsa-mir-589	1.17989	5.17408e-13	490.268	240.098	578.461
hsa-mir-519a-2	6.89174	1.6505e-08	60.8537	0.731707	419.387
hsa-mir-518b	6.34494	2.6251e-06	51.1707	0.95122	324.675
hsa-mir-520b	7.17289	9.57301e-08	43.6341	0.365854	312.983
hsa-mir-520f	7.91529	2.17851e-07	39.3659	0.121951	311.592
hsa-mir-519a-1	5.88469	9.70264e-07	48.8049	1.09756	287.202
hsa-mir-518e	7.37923	1.0406e-06	36.7561	0.219512	271.232
hsa-mir-516a-1	6.43909	1.67938e-06	42.0976	0.634146	271.07
hsa-mir-522	7.00587	1.52236e-07	37.0244	0.341463	259.388
hsa-mir-96	3.29091	6.38536e-17	74.5122	7.36585	245.213
hsa-mir-525	5.9789	0.00020708	40.0976	0.902439	239.739
hsa-mir-1180	1.61597	7.91493e-14	145.585	54.9024	235.262
hsa-mir-512-2	6.84232	1.03278e-07	33.561	0.268293	229.635
hsa-mir-512-1	6.72345	6.22805e-07	33.5366	0.317073	225.481
hsa-mir-518c	5.82668	5.14438e-05	32.3171	0.829268	188.301
hsa-mir-517a	4.7163	0.000236031	36.878	2.04878	173.928
hsa-mir-517b	4.7009	0.000242329	36.4878	2.04878	171.525
hsa-mir-516a-2	5.74723	4.02805e-07	26.9756	0.634146	155.035
hsa-mir-518a-1	6.88892	1.14676e-05	21.0488	0.170732	145.003
hsa-mir-527	6.83724	1.36612e-05	21.1707	0.170732	144.749
hsa-mir-520c	7.63784	8.01471e-08	18.9268	0.0243902	144.56
hsa-mir-518f	6.01902	1.56262e-05	23.4878	0.463415	141.374
hsa-mir-520g	6.78308	7.68376e-06	19.2927	0.121951	130.864
hsa-mir-518a-2	6.44816	2.74485e-05	17.7805	0.219512	114.651
hsa-mir-519c	6.48242	1.31919e-07	16.7561	0.170732	108.62
hsa-mir-196a-1	3.48928	7.94678e-07	26.2927	2.19512	91.7426
hsa-mir-1266	1.91981	1.6535e-09	47.0732	13.0976	90.3717
hsa-mir-135a-2	3.77566	5.15043e-09	23.5122	1.68293	88.7741
hsa-mir-196a-2	3.20833	4.48632e-06	27.1951	2.73171	87.2509
hsa-mir-508	1.97698	7.74987e-06	43	12.2683	85.01
hsa-mir-1323	5.26532	0.000193396	15.9268	0.585366	83.8598
hsa-mir-516b-1	5.70557	4.25314e-06	14.6829	0.292683	83.7744
hsa-mir-892a	6.15009	0.000270334	13.6098	0.0487805	83.7012
hsa-mir-519d	6.1323	2.08623e-06	13.4146	0.146341	82.2626
hsa-mir-520h	6.51989	2.60674e-06	12.3171	0.0731707	80.3059
hsa-mir-4652	6.57484	1.30039e-10	12	0.0487805	78.8981
hsa-mir-3677	1.90654	4.91594e-14	40.6829	12.2439	77.5637
hsa-mir-521-1	6.35352	0.000164521	12.0732	0.121951	76.7072
hsa-mir-1295a	3.01366	2.38294e-06	25.3415	3.34146	76.3705
hsa-mir-4661	1.99503	1.21421e-10	37.9268	12.4878	75.6654
hsa-mir-520e	6.2764	9.10961e-06	11.4878	0.097561	72.102
hsa-mir-466	4.97772	4.58483e-06	14.3415	0.536585	71.3878
hsa-mir-802	2.53212	0.00190004	28.0244	6.17073	70.9611
hsa-mir-517c	5.96195	3.51929e-06	11.8049	0.146341	70.3801
hsa-mir-1251	5.06449	3.59365e-11	11.9268	0.292683	60.4033
hsa-mir-203b	3.0655	3.98296e-05	18.7073	2.26829	57.3473
hsa-mir-135a-1	3.21041	7.40198e-08	17.7073	2	56.8478
hsa-mir-184	2.37357	6.89962e-05	21.6098	5.65854	51.2922
hsa-mir-421	1.29385	1.68808e-08	37.0488	16.5366	47.9355
hsa-mir-520d	4.94026	0.000242329	9.14634	0.317073	45.1853
hsa-mir-523	5.47884	2.31876e-06	7.82927	0.170732	42.8953
hsa-mir-4746	2.20971	4.16133e-14	18.0488	4.2439	39.8827
hsa-mir-944	2.0261	4.25314e-06	18.7073	6.07317	37.9028
hsa-mir-516b-2	4.95809	0.00133946	7.2439	0.219512	35.9159
hsa-mir-3591	2.10497	8.42566e-09	16.5854	4.85366	34.9116
hsa-mir-498	5.31634	0.000382682	5.87805	0.121951	31.2497
hsa-mir-515-2	5.50792	3.61031e-06	5.5122	0.0487805	30.3607
hsa-mir-524	5.22226	2.94866e-05	5.17073	0.0731707	27.0029
hsa-mir-2114	2.3158	1.25445e-06	11.6585	2.87805	26.9989
hsa-mir-34c	2.12644	1.83347e-08	12.0488	2.46341	25.621
hsa-mir-937	1.46591	7.50812e-06	16.878	7.21951	24.7417
hsa-mir-1270	2.01893	1.23386e-06	11.878	3.63415	23.981
hsa-mir-515-1	4.89964	0.00028218	4.80488	0.121951	23.5422
hsa-mir-514a-1	2.33589	1.6966e-05	9.92683	2.07317	23.188
hsa-mir-5683	1.62287	0.000484751	14.1951	6.26829	23.0368
hsa-mir-888	5.10058	8.73116e-05	4.41463	0	22.5172
hsa-mir-514a-2	2.29317	2.40581e-05	9.4878	2.29268	21.7571
hsa-mir-3200	1.5119	2.7372e-06	13.5122	5.02439	20.4291
hsa-mir-3682	1.56578	9.40325e-08	12.6585	5.34146	19.8204
hsa-mir-499a	1.60534	0.00124346	11.5366	7.19512	18.5201
hsa-mir-514a-3	1.97462	0.000120713	9	2.4878	17.7715
hsa-mir-211	1.78372	0.00551393	9.53659	3.56098	17.0106
hsa-mir-519b	4.7463	0.000312563	3.41463	0.0487805	16.2069
hsa-mir-7706	1.34279	2.02392e-08	11.9512	5.21951	16.0479
hsa-mir-372	2.17572	0.00121587	6.60976	2.68293	14.381
hsa-mir-190b	2.54113	4.08095e-07	5.46341	1.04878	13.8833
hsa-mir-891b	4.50314	0.000601922	2.85366	0	12.8504
hsa-mir-1304	1.24654	0.00550435	10	5.29268	12.4654
hsa-mir-1283-2	4.42065	0.000698979	2.73171	0.0487805	12.0759
hsa-mir-760	1.94702	8.76975e-09	6.12195	1.63415	11.9196
hsa-mir-3937	4.04725	0.00541697	2.90244	0.0487805	11.7469
hsa-mir-504	1.0723	0.00134407	10.439	5.36585	11.1938
hsa-mir-5187	1.66985	1.44022e-09	6.29268	2.12195	10.5079
hsa-mir-301b	1.35875	0.000386791	7.43902	3.34146	10.1078
hsa-mir-509-3	1.94694	2.92278e-05	5.09756	1.39024	9.92465
hsa-mir-526a-2	4.50358	0.00370278	2.12195	0.0243902	9.55638
hsa-mir-541	1.64557	5.77121e-05	5.39024	1.7561	8.87
hsa-mir-3144	3.09753	2.5278e-07	2.7561	0.292683	8.53709
hsa-mir-877	1.02015	3.98296e-05	8.19512	4.46341	8.36029
hsa-mir-137	3.10985	7.04877e-05	2.60976	0.268293	8.11594
hsa-mir-615	3.34024	0.000522964	2.26829	0.097561	7.57663
hsa-mir-765	2.29854	1.27903e-07	3.04878	0.609756	7.00775
hsa-mir-6516	1.70969	1.03545e-05	4.07317	1.39024	6.96385
hsa-mir-509-2	1.768	0.00208106	3.90244	1.26829	6.89952
hsa-mir-1283-1	4.27246	0.000113178	1.60976	0	6.87761
hsa-mir-892b	3.79497	0.000688934	1.80488	0	6.84946
hsa-mir-509-1	1.7078	0.000701456	3.97561	1.36585	6.78954
hsa-mir-3662	2.24159	0.000105851	3.02439	0.804878	6.77946
hsa-mir-1226	1.08591	0.00133745	5.85366	3.09756	6.35656
hsa-mir-939	1.11898	2.79619e-05	5.63415	2.80488	6.3045
hsa-mir-561	2.35593	0.00694842	2.56098	0.512195	6.03347
hsa-mir-581	1.30981	0.000204883	4.09756	1.80488	5.36702
hsa-mir-3610	1.11335	0.00256822	4.36585	2.04878	4.86071
hsa-mir-3131	1.77553	0.00333042	2.58537	0.731707	4.59039
hsa-mir-548x	3.58233	1.27658e-05	1.26829	0.0243902	4.54344
hsa-mir-4739	1.32227	0.00459995	3.17073	1.4878	4.19258
hsa-mir-4501	3.78577	0.00370278	1.09756	0	4.15511
hsa-mir-3189	2.10096	0.0014384	1.92683	0.463415	4.0482
hsa-mir-5003	1.48202	0.000411785	2.68293	1	3.97614
hsa-mir-346	1.67516	0.00607696	2.36585	0.731707	3.96317
hsa-mir-521-2	3.54493	0.00062336	1.02439	0.0243902	3.63139
hsa-mir-4664	1.27101	0.00327436	2.85366	1.31707	3.62703
hsa-mir-1292	1.21232	0.000561482	2.90244	1.31707	3.5187
hsa-mir-4758	2.05721	4.93147e-05	1.65854	0.341463	3.41195
hsa-mir-34b	1.55147	0.00117754	2.12195	0.609756	3.29215
hsa-mir-548y	3.16329	0.000672966	1	0.0487805	3.16329
hsa-mir-4515	2.27801	6.04473e-05	1.34146	0.219512	3.05587
hsa-mir-518d	3.34455	0.00516211	0.878049	0.0243902	2.93668
hsa-mir-526a-1	3.32254	0.00321651	0.829268	0.0243902	2.75528
hsa-mir-892c	2.81531	0.00259294	0.95122	0	2.67797
hsa-mir-3691	1.01605	0.00915256	2.4878	1.31707	2.52772
hsa-mir-7974	2.06459	0.00713154	1.21951	0.365854	2.5178
hsa-mir-1276	1.39381	0.00399308	1.65854	0.707317	2.31169
hsa-mir-4523	1.37327	0.000939923	1.65854	0.585366	2.27762
hsa-mir-519e	3.14329	0.000470197	0.658537	0	2.06997
hsa-mir-6720	2.0235	0.000645385	0.97561	0.121951	1.97415
hsa-mir-1915	1.82741	0.00693652	0.95122	0.243902	1.73827
hsa-mir-6844	1.61474	0.00384244	1.04878	0.317073	1.69351
hsa-mir-1254-2	1.97902	0.000473912	0.853659	0.170732	1.68941
hsa-mir-1254-1	1.40669	0.00475922	1.04878	0.390244	1.47531
hsa-mir-3680-1	1.09541	0.00868824	1.29268	0.585366	1.41602
hsa-mir-513c	1.93829	0.00347041	0.609756	0.0731707	1.18189
hsa-mir-6728	1.71944	0.00216251	0.512195	0.0731707	0.880686
hsa-mir-548x-2	2.21177	0.000103791	0.390244	0	0.863131
hsa-mir-1293	2.07541	0.000637617	0.365854	0	0.759297
hsa-mir-4666a	1.78429	0.00743155	0.414634	0.0243902	0.739827
hsa-mir-3171	1.89488	0.00149489	0.341463	0	0.647032
hsa-mir-4793	1.818	0.00593453	0.341463	0.0243902	0.620781
hsa-mir-4435-1	1.72986	0.00157029	0.268293	0	0.464107
hsa-mir-548az	1.55062	0.00819941	0.292683	0.0243902	0.453839
hsa-mir-5007	1.66118	0.00277894	0.243902	0	0.405165
hsa-mir-513a-1	1.4471	0.00593453	0.243902	0	0.352951
hsa-mir-6512	1.55642	0.00392489	0.219512	0	0.341654
hsa-mir-6871	1.49834	0.00297603	0.219512	0	0.328904
hsa-mir-10a	-1.06624	6.7019e-07	93102.9	184233	99269.5
hsa-mir-101-2	-1.15665	2.20207e-16	54669	132264	63232.7
hsa-mir-101-1	-1.15955	2.20207e-16	54066.3	131236	62692.5
hsa-let-7c	-1.09637	2.27773e-06	16298.2	34874.1	17868.8
hsa-mir-142	-1.4194	2.051e-10	6749.9	19099.7	9580.81
hsa-mir-199b	-1.5758	4.90905e-07	5871.54	16067	9252.37
hsa-mir-199a-2	-1.63008	1.74179e-07	4944	14175.1	8059.1
hsa-mir-145	-1.26058	1.31595e-09	5555.63	13956.8	7003.34
hsa-mir-451a	-1.13511	0.00317077	5537.39	11995	6285.55
hsa-mir-199a-1	-1.63981	1.73788e-07	3008.95	8777.1	4934.1
hsa-mir-99a	-1.2049	3.65961e-07	3671.95	9298.8	4424.33
hsa-mir-150	-1.05776	0.00203415	2554.02	4573.32	2701.55
hsa-mir-424	-1.96325	3.58589e-18	1049.83	4283.59	2061.08
hsa-mir-125b-2	-1.11582	6.46369e-08	1595.17	3660.12	1779.93
hsa-mir-542	-1.1795	5.49954e-10	1497.9	3291.02	1766.78
hsa-mir-125b-1	-1.13611	3.29238e-08	1446.66	3362.29	1643.56
hsa-mir-139	-2.00361	5.05426e-22	618.683	2791.54	1239.6
hsa-mir-144	-1.15104	0.000141278	959.756	2257.73	1104.72
hsa-mir-223	-1.18085	2.76277e-07	731.122	1543.05	863.348
hsa-mir-3607	-1.13469	0.00412817	633.195	1717.9	718.482
hsa-mir-130a	-1.86453	3.13513e-24	195.927	792.463	365.311
hsa-mir-136	-1.0929	0.00011251	140.854	310.512	153.939
hsa-mir-214	-1.55597	7.5058e-07	82.6098	216.341	128.538
hsa-mir-378c	-1.2001	2.53035e-08	83.7073	225.366	100.457
hsa-mir-511	-1.49431	6.00949e-17	64.2927	198.439	96.0735
hsa-mir-450b	-1.61088	4.62915e-18	54.2439	167.073	87.3807
hsa-mir-369	-1.00581	0.00103328	77.3415	152.683	77.7911
hsa-mir-411	-1.13909	0.000109188	62.8293	137.098	71.5681
hsa-mir-33b	-1.10635	0.000131	61.9268	167.659	68.5127
hsa-mir-376c	-1.25405	9.74093e-06	38.3659	91.7805	48.1127
hsa-mir-450a-2	-1.69756	3.70231e-14	20.3171	69.2439	34.4894
hsa-mir-450a-1	-1.57916	9.52496e-14	21.5122	68.3171	33.9713
hsa-mir-3653	-1.10684	1.71101e-05	28.2683	70.1951	31.2884
hsa-mir-1258	-2.95466	2.37743e-10	9.80488	87.1707	28.9701
hsa-mir-3614	-1.14255	0.000103791	23.7073	56.6585	27.0868
hsa-mir-490	-3.58293	5.19513e-12	4.46341	53.5366	15.9921
hsa-mir-376b	-1.02177	0.000281281	10.6341	22.5854	10.8656
hsa-mir-627	-1.21368	1.12425e-09	7.02439	17.4878	8.52537
hsa-mir-23c	-1.29227	4.37837e-06	4.92683	14	6.3668
hsa-mir-376a-2	-1.28875	0.000113486	4	10.5366	5.15499
hsa-mir-378d-2	-1.2161	2.2124e-05	4.17073	11	5.07202
hsa-mir-4510	-1.17531	4.04022e-05	4.2439	9.87805	4.98789
hsa-mir-378d-1	-1.30322	1.0626e-05	3.12195	9.17073	4.06858
hsa-mir-6503	-1.76457	8.04336e-09	2.02439	7.21951	3.57218
hsa-mir-621	-1.65021	0.000182865	1.68293	5.60976	2.77719
hsa-mir-665	-1.33981	8.44119e-05	1.82927	5.04878	2.45087
hsa-mir-6502	-1.55616	2.08623e-06	1.29268	3.97561	2.01162
hsa-mir-4777	-1.27963	0.000103627	1.46341	3.95122	1.87263
hsa-mir-4686	-3.40137	8.54315e-15	0.487805	5.82927	1.6592
hsa-mir-4800	-1.55737	5.2172e-05	1.04878	3.41463	1.63334
hsa-mir-551a	-1.46948	0.000652794	1.02439	3.04878	1.50532
hsa-mir-4521	-1.02085	0.00252327	1.34146	2.92683	1.36943
hsa-mir-4683	-1.94045	6.6792e-05	0.487805	2.2439	0.946562
hsa-mir-378f	-1.30846	0.000600429	0.707317	2.04878	0.925496
hsa-mir-6087	-1.40111	0.00234009	0.609756	1.92683	0.854333
hsa-mir-7850	-1.09277	0.00670421	0.756098	1.85366	0.82624
hsa-mir-548aw	-1.06329	0.00879143	0.658537	1.56098	0.700214
hsa-mir-378b	-1.07363	0.00707675	0.609756	1.53659	0.65465
hsa-mir-600	-1.48476	0.00121769	0.439024	1.53659	0.651846
hsa-mir-7845	-1.352	0.00330576	0.439024	1.39024	0.593559
hsa-mir-934	-1.9219	0.000205968	0.268293	1.26829	0.515632
hsa-mir-873	-1.8461	0.000522964	0.121951	0.780488	0.225134
hsa-mir-876	-1.74922	0.00334552	0.0243902	0.365854	0.0426639
hsa-mir-7704	-1.58188	0.00286403	0	0.243902	0
hsa-mir-7849	-1.44503	0.0045556	0	0.219512	0
